# Supplementary material for: Visible-light mediated cross-coupling of aryl halides with sodium sulfinatesviacarbonyl-photoredox/nickel dual catalysis
Source: Royal Society of Chemistry journal article supplement (doi:10.1039/d1qo01850g), 2022-01-01

## Supporting Information

### **Visible-light mediated cross-coupling of aryl halides with sodium sulfinates via carbonyl-photoredox/nickel dual catalysis**

Shan Jiang,<sup>a</sup> Zi-Tong Zhang,<sup>a</sup> David James Young,<sup>b</sup> Lu-Lu Chai,<sup>a</sup> Qi Wu<sup>a</sup> and Hong-Xi Li<sup>\*a</sup>

<sup>a</sup> College of Chemistry, Chemical Engineering and Materials Science, Soochow University,  
Suzhou 215123, People's Republic of China

<sup>b</sup> College of Engineering, IT and Environment, Charles Darwin University, Darwin, NT 0909,  
Australia

## Table of Contents

|                             |                                                                                                                                                                                                                                                                                                                                                                              |     |
|-----------------------------|------------------------------------------------------------------------------------------------------------------------------------------------------------------------------------------------------------------------------------------------------------------------------------------------------------------------------------------------------------------------------|-----|
| <b>Fig. S1</b>              | Reaction set-up with a 45 W CFL (a), gram scale reaction set-up with 2×45 W CFLs (b), the absorbance spectrum of Cl-TXO in DMSO (c), the output spectrum of 45 W CFL (d). .....                                                                                                                                                                                              | S3  |
| <b>Fig. S2</b>              | (a) Emission spectra of Cl-TXO in DMSO ( $1 \times 10^{-4}$ mol·L <sup>-1</sup> ) in the presence of increasing <b>2a</b> concentrations excited at $\lambda = 374$ nm. (b) Stern-Volmer plot of $I_0/I$ versus <b>2a</b> concentration in Cl-TXO DMSO solution ( $I_0$ and $I$ represent the intensities of the emission in the absence and presence of the quencher) ..... | S3  |
| <b>Fig. S3</b>              | (a) Emission spectra of Cl-TXO in DMSO ( $1 \times 10^{-4}$ mol·L <sup>-1</sup> ) in the presence of increasing <b>1a</b> concentrations excited at $\lambda = 374$ nm. (b) Stern-Volmer plot of $I_0/I$ versus <b>1a</b> concentration in Cl-TXO DMSO solution ( $I_0$ and $I$ represent the intensities of the emission in the absence and presence of the quencher) ..... | S4  |
| <b>Fig. S4</b>              | The positive-ion ESI mass spectrum of 2,2,6,6-tetramethylpiperidin-1-yl benzenesulfonate .....                                                                                                                                                                                                                                                                               | S4  |
| <b>Fig. S5</b>              | The positive-ion ESI mass spectrum of (2-(phenylsulfonyl)ethene-1,1-diyl)dibenzene.                                                                                                                                                                                                                                                                                          | S5  |
| <b>Fig. S6</b>              | The positive-ion ESI mass spectrum of (2-(phenylsulfonyl)ethane-1,1-diyl)dibenzene.                                                                                                                                                                                                                                                                                          | S5  |
| <b>NMR data of products</b> | .....                                                                                                                                                                                                                                                                                                                                                                        | S6  |
| <b>References</b>           | .....                                                                                                                                                                                                                                                                                                                                                                        | S20 |
| <b>NMR spectra</b>          | .....                                                                                                                                                                                                                                                                                                                                                                        | S21 |

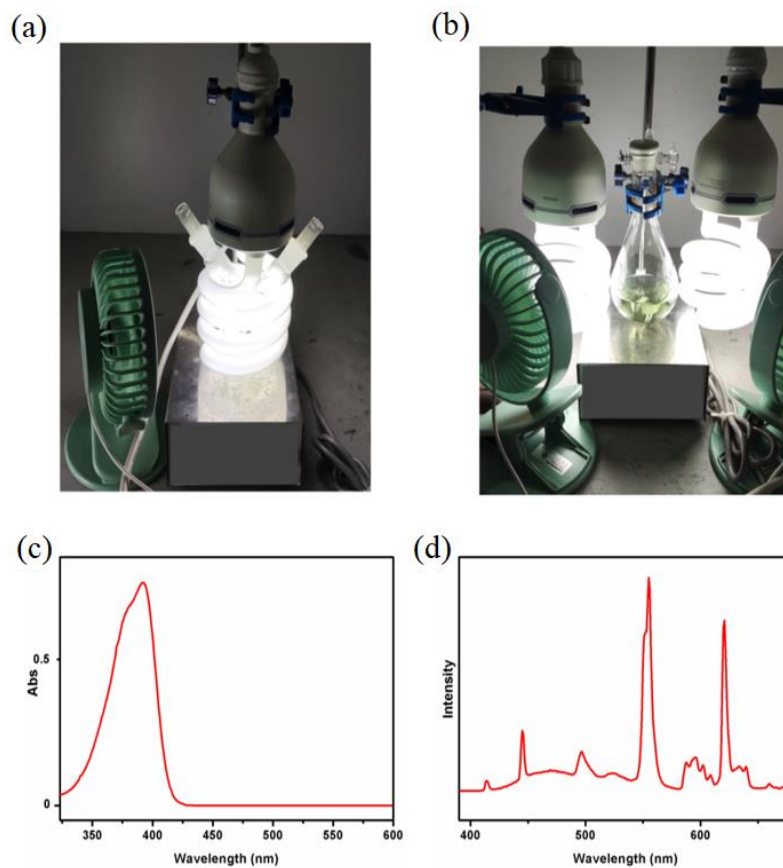

**Fig. S1** Reaction set-up with a 45 W CFL (a), gram scale reaction set-up with  $2 \times 45$  W CFLs (b), the absorbance spectrum of Cl-TXO in DMSO (c), the output spectrum of 45 W CFL (d).

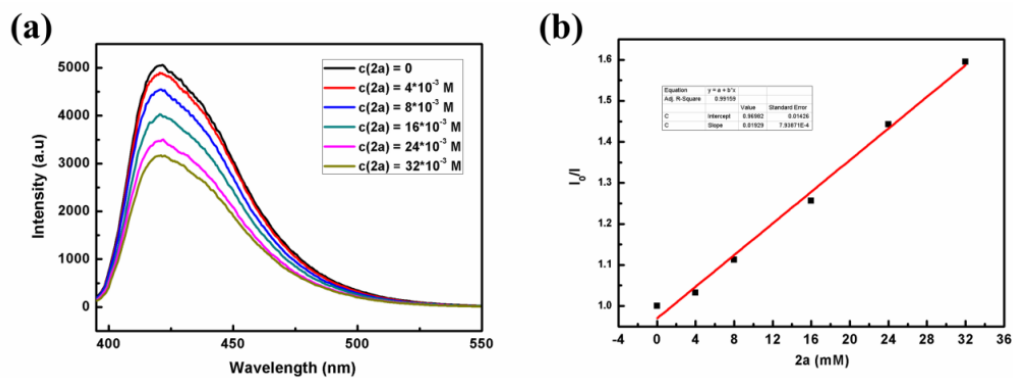

**Fig. S2** (a) Emission spectra of Cl-TXO in DMSO ( $1 \times 10^{-4}$  mol·L $^{-1}$ ) in the presence of increasing **2a** concentrations excited at  $\lambda = 374$  nm. (b) Stern-Volmer plot of  $I_0/I$  versus **2a** concentration in Cl-TXO DMSO solution ( $I_0$  and  $I$  represent the intensities of the emission in the absence and presence of the quencher).

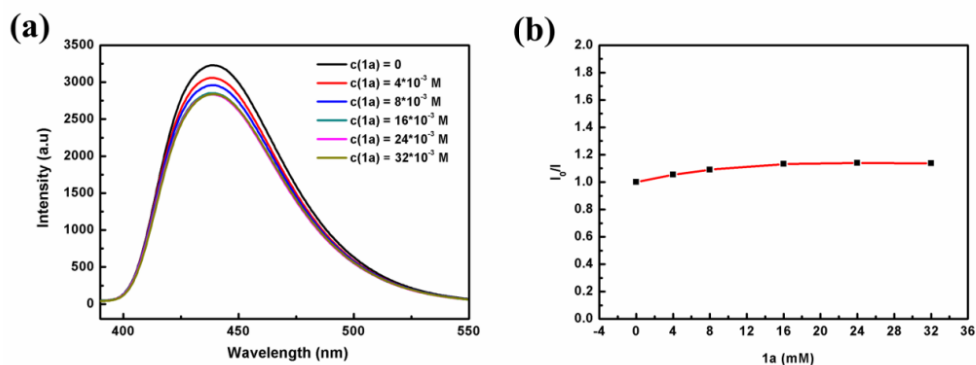

**Fig. S3** (a) Emission spectra of Cl-TXO in DMSO ( $1 \times 10^{-4} \text{ mol} \cdot \text{L}^{-1}$ ) in the presence of increasing **1a** concentrations excited at  $\lambda = 374 \text{ nm}$ . (b) Stern-Volmer plot of  $I_0/I$  versus **1a** concentration in Cl-TXO DMSO solution ( $I_0$  and  $I$  represent the intensities of the emission in the absence and presence of the quencher).

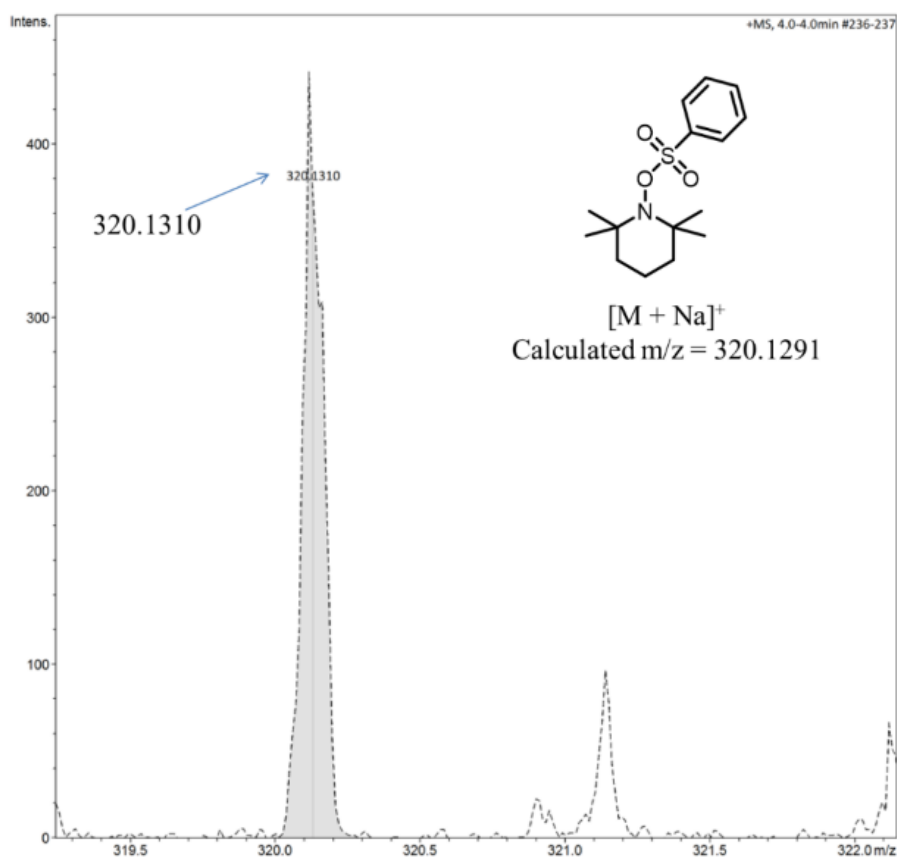

**Fig. S4** The positive-ion ESI mass spectrum of 2,2,6,6-tetramethylpiperidin-1-yl benzenesulfonate.

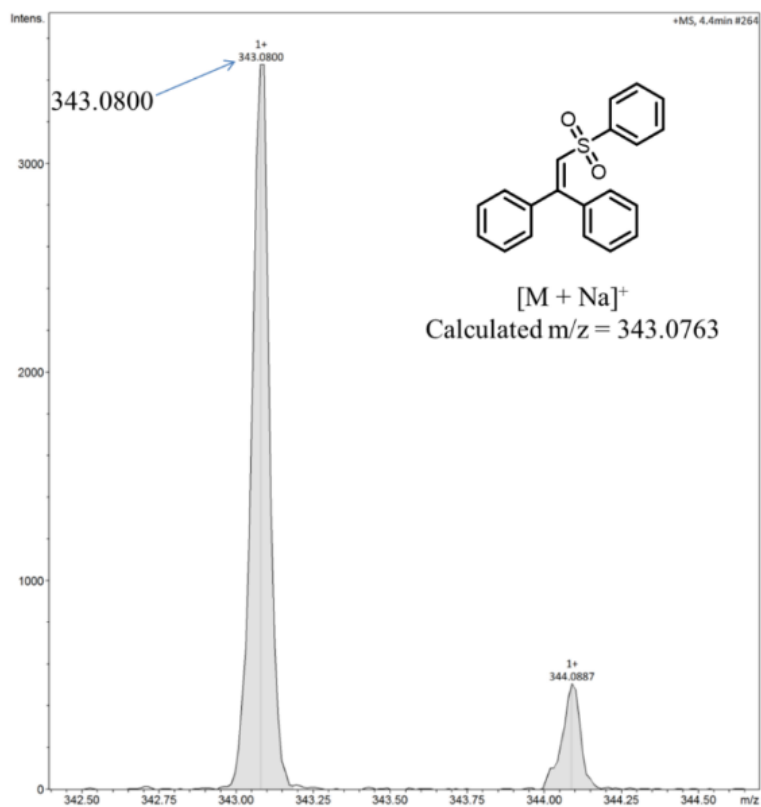

**Fig. S5** The positive-ion ESI mass spectrum of (2-(phenylsulfonyl)ethene-1,1-diyl)dibenzene.

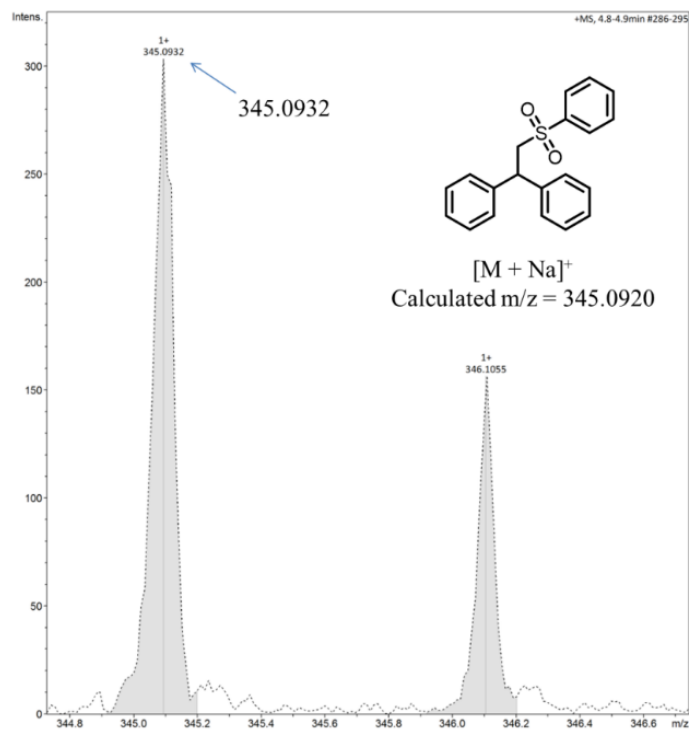

**Fig. S6** The positive-ion ESI mass spectrum of (2-(phenylsulfonyl)ethane-1,1-diyl)dibenzene.

## NMR data of products

### 4-(phenylsulfonyl)benzonitrile (**3aa**)<sup>S1</sup>

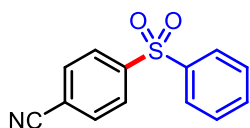

**3aa** was obtained in 90% yield (43.7 mg) according to the general procedure (petroleum ether/EtOAc, 10:1): white solid. <sup>1</sup>H NMR (400 MHz, CDCl<sub>3</sub>, ppm) δ 8.06 (d, *J* = 8.5 Hz, 2H), 7.96 (d, *J* = 7.2 Hz, 2H), 7.81 (d, *J* = 8.5 Hz, 2H), 7.64 (t, *J* = 7.4 Hz, 1H), 7.55 (t, *J* = 7.6 Hz, 2H). <sup>13</sup>C NMR (101 MHz, CDCl<sub>3</sub>, ppm) δ 145.9, 140.1, 134.1, 133.1, 129.7, 128.3, 128.0, 117.2, 116.9. QTOF-MS *m/z* [M + Na]<sup>+</sup> Calcd for C<sub>13</sub>H<sub>9</sub>NO<sub>2</sub>SNa<sup>+</sup> 266.0246; Found 266.0243.

### 1-(4-(phenylsulfonyl)phenyl)ethan-1-one (**3ba**)<sup>S1</sup>

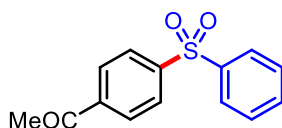

**3ba** was obtained in 86% yield (44.7 mg) according to the general procedure (petroleum ether/EtOAc, 10:1): white solid. <sup>1</sup>H NMR (400 MHz, CDCl<sub>3</sub>, ppm) δ 8.11-8.00 (m, 4H), 7.96 (d, *J* = 7.1 Hz, 2H), 7.60 (t, *J* = 7.4 Hz, 1H), 7.53 (t, *J* = 7.4 Hz, 2H), 2.62 (s, 3H). <sup>13</sup>C NMR (101 MHz, CDCl<sub>3</sub>, ppm) δ 196.7, 145.5, 140.8, 140.4, 133.7, 129.5, 129.1, 128.0, 127.9, 26.9. QTOF-MS *m/z* [M + Na]<sup>+</sup> Calcd for C<sub>14</sub>H<sub>12</sub>O<sub>3</sub>SNa<sup>+</sup> 283.0399; Found 283.0416.

### methyl 4-(phenylsulfonyl)benzoate (**3ca**)<sup>S1</sup>

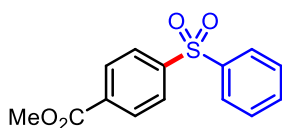

**3ca** was obtained in 87% yield (48.0 mg) according to the general procedure (petroleum ether/EtOAc, 10:1): white solid. <sup>1</sup>H NMR (400 MHz, CDCl<sub>3</sub>, ppm) δ 8.15 (d, *J* = 8.7 Hz, 2H), 8.01 (d, *J* = 8.7 Hz, 2H), 7.96 (d, *J* = 7.1 Hz, 2H), 7.60 (t, *J* = 7.4 Hz, 1H), 7.53 (t, *J* = 7.4 Hz, 2H), 3.94 (s, 3H). <sup>13</sup>C NMR (101 MHz, CDCl<sub>3</sub>, ppm) δ 165.5, 145.5, 140.8, 134.3, 133.6, 130.5, 129.5, 127.9, 127.7, 52.7. QTOF-MS *m/z* [M + Na]<sup>+</sup> Calcd for C<sub>14</sub>H<sub>12</sub>O<sub>4</sub>SNa<sup>+</sup> 299.0349; Found 299.0335.

### ethyl 4-(phenylsulfonyl)benzoate (**3da**)<sup>S1</sup>

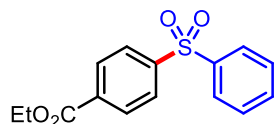

**3da** was obtained in 88% yield (51.0 mg) according to the general procedure (petroleum ether/EtOAc, 10:1): white solid.  $^1\text{H}$  NMR (400 MHz,  $\text{CDCl}_3$ , ppm)  $\delta$  8.16 (d,  $J = 8.7$  Hz, 2H), 8.01 (d,  $J = 8.7$  Hz, 2H), 7.96 (d,  $J = 7.1$  Hz, 2H), 7.60 (t,  $J = 7.4$  Hz, 1H), 7.53 (t,  $J = 7.4$  Hz, 2H), 4.39 (q,  $J = 7.1$  Hz, 2H), 1.39 (t,  $J = 7.1$  Hz, 3H).  $^{13}\text{C}$  NMR (101 MHz,  $\text{CDCl}_3$ , ppm)  $\delta$  165.0, 145.3, 140.8, 134.7, 133.6, 130.4, 129.5, 127.8, 127.7, 61.7, 14.2. QTOF-MS  $m/z$   $[\text{M} + \text{Na}]^+$  Calcd for  $\text{C}_{15}\text{H}_{14}\text{O}_4\text{SNa}^+$  313.0505; Found 313.0515.

#### 1-(phenylsulfonyl)-4-(trifluoromethyl)benzene (**3ea**)<sup>S2</sup>

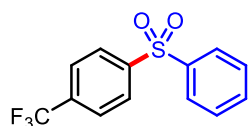

**3ea** was obtained in 61% yield (34.9 mg) according to the general procedure (petroleum ether/EtOAc, 10:1): white solid.  $^1\text{H}$  NMR (400 MHz,  $\text{CDCl}_3$ , ppm)  $\delta$  8.08 (d,  $J = 8.2$  Hz, 2H), 7.97 (dt,  $J = 3.5, 2.4$  Hz, 2H), 7.77 (d,  $J = 8.3$  Hz, 2H), 7.62 (t,  $J = 7.4$  Hz, 1H), 7.54 (t,  $J = 7.4$  Hz, 2H).  $^{13}\text{C}$  NMR (101 MHz,  $\text{CDCl}_3$ , ppm)  $\delta$  145.2, 140.6, 134.9 (q,  $^2J_{\text{C-F}} = 33.2$  Hz), 133.8, 129.6, 128.2, 127.9, 126.5 (q,  $^3J_{\text{C-F}} = 3.7$  Hz), 123.1 (d,  $^1J_{\text{C-F}} = 273.3$  Hz).  $^{19}\text{F}$  NMR (377 MHz,  $\text{CDCl}_3$ , ppm)  $\delta$  -63.2. QTOF-MS  $m/z$   $[\text{M} + \text{Na}]^+$  Calcd for  $\text{C}_{13}\text{H}_9\text{F}_3\text{O}_2\text{SNa}^+$  309.0168; Found 309.0177.

#### 4-(phenylsulfonyl)benzaldehyde (**3fa**)<sup>S1</sup>

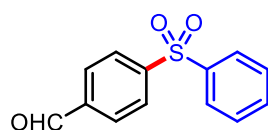

**3fa** was obtained in 58% yield (28.5 mg) according to the general procedure (petroleum ether/EtOAc, 10:1): white solid.  $^1\text{H}$  NMR (400 MHz,  $\text{CDCl}_3$ , ppm)  $\delta$  10.08 (s, 1H), 8.12 (d,  $J = 8.3$  Hz, 2H), 7.99 (dd,  $J = 13.2, 7.8$  Hz, 4H), 7.62 (t,  $J = 7.4$  Hz, 1H), 7.54 (t,  $J = 7.4$  Hz, 2H).  $^{13}\text{C}$  NMR (101 MHz,  $\text{CDCl}_3$ , ppm)  $\delta$  190.7, 146.7, 140.6, 139.1, 133.8, 130.3, 129.6, 128.4, 128.0. QTOF-MS  $m/z$   $[\text{M} + \text{Na}]^+$  Calcd for  $\text{C}_{13}\text{H}_{10}\text{O}_3\text{SNa}^+$  269.0243; Found 269.0268.

#### 1-nitro-4-(phenylsulfonyl)benzene (**3ga**)<sup>S1</sup>

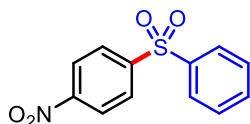

**3ga** was obtained in 90% yield (47.3 mg) according to the general procedure (petroleum ether/EtOAc, 10:1): white solid.  $^1\text{H}$  NMR (400 MHz,  $\text{CDCl}_3$ , ppm)  $\delta$  8.46-8.23 (m, 2H), 8.23-8.05 (m, 2H), 8.05-7.91 (m, 2H), 7.74-7.61 (m, 1H), 7.57 (dt,  $J = 8.3, 5.0$  Hz, 2H).  $^{13}\text{C}$  NMR (101 MHz,  $\text{CDCl}_3$ , ppm)  $\delta$  150.3, 147.4, 140.0, 134.1, 129.7, 129.0, 128.0, 124.5. QTOF-MS  $m/z$   $[\text{M} + \text{Na}]^+$  Calcd for  $\text{C}_{12}\text{H}_9\text{NO}_4\text{SNa}^+$  286.0144; Found 286.0173.

#### 4-(phenylsulfonyl)-1,1'-biphenyl (**3ha**)<sup>S1</sup>

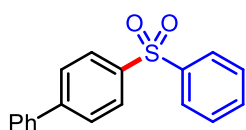

**3ha** was obtained in 64% yield (37.6 mg) according to the general procedure (petroleum ether/EtOAc, 10:1): white solid.  $^1\text{H}$  NMR (400 MHz,  $\text{CDCl}_3$ , ppm)  $\delta$  8.00 (t,  $J = 7.5$  Hz, 4H), 7.70 (d,  $J = 8.5$  Hz, 2H), 7.63-7.49 (m, 5H), 7.43 (dt,  $J = 22.2, 7.1$  Hz, 3H).  $^{13}\text{C}$  NMR (101 MHz,  $\text{CDCl}_3$ , ppm)  $\delta$  146.2, 141.7, 140.1, 139.2, 133.2, 129.3, 129.1, 128.6, 128.2, 128.0, 127.7, 127.4. QTOF-MS  $m/z$   $[\text{M} + \text{Na}]^+$  Calcd for  $\text{C}_{18}\text{H}_{14}\text{O}_2\text{SNa}^+$  317.0607; Found 317.0614.

#### 1-(tert-butyl)-4-(phenylsulfonyl)benzene (**3ia**)<sup>S3</sup>

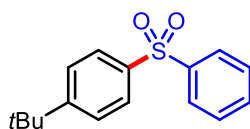

**3ia** was obtained in 54% yield (29.6 mg) according to the general procedure (petroleum ether/EtOAc, 10:1): white solid.  $^1\text{H}$  NMR (400 MHz,  $\text{CDCl}_3$ , ppm)  $\delta$  7.95 (d,  $J = 6.9$  Hz, 2H), 7.86 (d,  $J = 8.7$  Hz, 2H), 7.55 (t,  $J = 7.3$  Hz, 1H), 7.53-7.47 (m, 4H), 1.31 (s, 9H).  $^{13}\text{C}$  NMR (101 MHz,  $\text{CDCl}_3$ , ppm)  $\delta$  157.1, 142.0, 138.6, 133.0, 129.2, 127.6, 127.5, 126.3, 35.2, 31.0. QTOF-MS  $m/z$   $[\text{M} + \text{Na}]^+$  Calcd for  $\text{C}_{16}\text{H}_{18}\text{O}_2\text{SNa}^+$  297.0920; Found 297.0895.

#### 1-fluoro-4-(phenylsulfonyl)benzene (**3ja**)<sup>S4</sup>

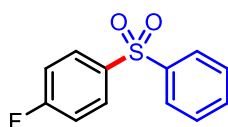

**3ja** was obtained in 75% yield (35.4 mg) according to the general procedure (petroleum



ether/EtOAc, 10:1): white solid.  $^1\text{H}$  NMR (400 MHz,  $\text{CDCl}_3$ , ppm)  $\delta$  8.02-7.87 (m, 4H), 7.58 (t,  $J = 7.3$  Hz, 1H), 7.51 (t,  $J = 7.4$  Hz, 2H), 7.22-7.14 (m, 2H).  $^{13}\text{C}$  NMR (101 MHz,  $\text{CDCl}_3$ , ppm)  $\delta$  165.5 (d,  $^1J_{\text{C-F}} = 256.1$  Hz), 141.5, 137.7 (d,  $^4J_{\text{C-F}} = 3.0$  Hz), 133.3, 130.5 (d,  $^3J_{\text{C-F}} = 9.6$  Hz), 129.4, 127.6, 116.6 (d,  $^2J_{\text{C-F}} = 22.7$  Hz).  $^{19}\text{F}$  NMR (377 MHz,  $\text{CDCl}_3$ , ppm)  $\delta$  -104.2. QTOF-MS  $m/z$  [ $\text{M} + \text{Na}$ ] $^+$  Calcd for  $\text{C}_{12}\text{H}_9\text{FO}_2\text{SNa}^+$  259.0199; Found 259.0184.

### 1-methoxy-4-(phenylsulfonyl)benzene (3ka)<sup>S1</sup>

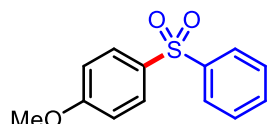

**3ka** was obtained in 35% yield (17.4 mg) based on 1-bromo-4-methoxybenzene, 57% yield (28.3 mg) based on 1-iodo-4-methoxybenzene according to the general procedure (petroleum ether/EtOAc, 10:1): white solid.  $^1\text{H}$  NMR (400 MHz,  $\text{CDCl}_3$ , ppm)  $\delta$  7.90 (dd,  $J = 14.8, 8.0$  Hz, 4H), 7.54 (t,  $J = 7.3$  Hz, 1H), 7.49 (t,  $J = 7.3$  Hz, 2H), 6.97 (d,  $J = 8.9$  Hz, 2H), 3.84 (s, 3H).  $^{13}\text{C}$  NMR (101 MHz,  $\text{CDCl}_3$ , ppm)  $\delta$  163.4, 142.3, 133.1, 132.8, 130.0, 129.2, 127.3, 114.5, 55.6. QTOF-MS  $m/z$  [ $\text{M} + \text{Na}$ ] $^+$  Calcd for  $\text{C}_{13}\text{H}_{12}\text{O}_3\text{SNa}^+$  271.0399; Found 271.0396.

### 3-(phenylsulfonyl)benzonitrile (3la)<sup>S1</sup>

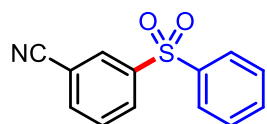

**3la** was obtained in 61% yield (29.6 mg) according to the general procedure (petroleum ether/EtOAc, 10:1): white solid.  $^1\text{H}$  NMR (400 MHz,  $\text{CDCl}_3$ , ppm)  $\delta$  8.22 (s, 1H), 8.18 (d,  $J = 8.0$  Hz, 1H), 7.96 (d,  $J = 7.2$  Hz, 2H), 7.84 (d,  $J = 7.8$  Hz, 1H), 7.65 (dd,  $J = 15.1, 7.5$  Hz, 2H), 7.57 (t,  $J = 7.5$  Hz, 2H).  $^{13}\text{C}$  NMR (101 MHz,  $\text{CDCl}_3$ , ppm)  $\delta$  143.5, 140.2, 136.2, 134.0, 131.5, 131.3, 130.4, 129.7, 127.9, 117.0, 114.0. QTOF-MS  $m/z$  [ $\text{M} + \text{Na}$ ] $^+$  Calcd for  $\text{C}_{13}\text{H}_9\text{NO}_2\text{SNa}^+$  266.0246; Found 266.0258.

### methyl 3-(phenylsulfonyl)benzoate (3ma)

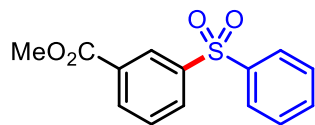

**3ma** was obtained in 49% yield (27.0 mg) according to the general procedure (petroleum ether/EtOAc, 10:1): white solid. M.P. = 60.5-61.9 °C.  $^1\text{H}$  NMR (400 MHz,  $\text{CDCl}_3$ , ppm)  $\delta$  8.60 (s,

1H), 8.23 (d,  $J = 7.8$  Hz, 1H), 8.14 (d,  $J = 8.5$  Hz, 1H), 7.97 (d,  $J = 7.1$  Hz, 2H), 7.74-7.56 (m, 2H), 7.53 (t,  $J = 7.4$  Hz, 2H), 3.95 (s, 3H).  $^{13}\text{C}$  NMR (101 MHz,  $\text{CDCl}_3$ , ppm)  $\delta$  165.3, 142.4, 141.0, 134.1, 133.5, 131.6, 131.6, 129.6, 129.5, 128.8, 127.8, 52.6. IR (KBr disk) 3076, 2954, 2918, 2850, 1716, 1597, 1444, 1317, 1266, 1153, 1125, 1094, 1023, 999, 974, 925, 847, 820, 744, 712, 684  $\text{cm}^{-1}$ . QTOF-MS  $m/z$   $[\text{M} + \text{Na}]^+$  Calcd for  $\text{C}_{14}\text{H}_{12}\text{O}_4\text{SNa}^+$  299.0349; Found 299.0343.

### 2-(phenylsulfonyl)benzotrile (3na)<sup>S1</sup>

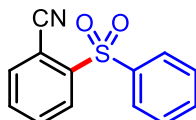

**3na** was obtained in 47% yield (22.8 mg) according to the general procedure (petroleum ether/EtOAc, 10:1): white solid.  $^1\text{H}$  NMR (400 MHz,  $\text{CDCl}_3$ , ppm)  $\delta$  8.35 (d,  $J = 7.1$  Hz, 1H), 8.09 (d,  $J = 7.2$  Hz, 2H), 7.81 (t,  $J = 6.8$  Hz, 2H), 7.69 (t,  $J = 7.6$  Hz, 1H), 7.65 (t,  $J = 7.4$  Hz, 1H), 7.57 (t,  $J = 7.5$  Hz, 2H).  $^{13}\text{C}$  NMR (101 MHz,  $\text{CDCl}_3$ , ppm)  $\delta$  143.7, 139.5, 135.7, 134.2, 133.4, 133.3, 129.8, 129.4, 128.7, 115.6, 111.5. QTOF-MS  $m/z$   $[\text{M} + \text{Na}]^+$  Calcd for  $\text{C}_{13}\text{H}_9\text{NO}_2\text{SNa}^+$  266.0246; Found 266.0251.

### 1-(2-(phenylsulfonyl)phenyl)ethan-1-one (3oa)<sup>S5</sup>

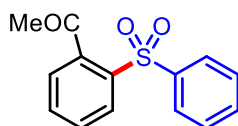

**3oa** was obtained in 56% yield (29.1 mg) according to the general procedure (petroleum ether/EtOAc, 10:1): colorless oil.  $^1\text{H}$  NMR (400 MHz,  $\text{CDCl}_3$ , ppm)  $\delta$  8.05 (d,  $J = 7.8$  Hz, 1H), 7.95 (d,  $J = 7.0$  Hz, 2H), 7.65-7.47 (m, 5H), 7.30 (d,  $J = 7.5$  Hz, 1H), 2.69 (s, 3H).  $^{13}\text{C}$  NMR (101 MHz,  $\text{CDCl}_3$ , ppm)  $\delta$  203.3, 142.4, 141.3, 138.1, 133.4, 133.4, 130.0, 129.9, 129.1, 128.0, 126.0, 32.0. QTOF-MS  $m/z$   $[\text{M} + \text{Na}]^+$  Calcd for  $\text{C}_{14}\text{H}_{12}\text{O}_3\text{SNa}^+$  283.0399; Found 283.0424.

### phenyl(2-(phenylsulfonyl)phenyl)methanone (3pa)<sup>S1</sup>

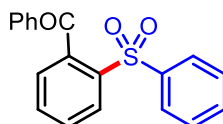

**3pa** was obtained in 59% yield (38.0 mg) according to the general procedure (petroleum ether/EtOAc, 10:1): white solid.  $^1\text{H}$  NMR (400 MHz,  $\text{CDCl}_3$ , ppm)  $\delta$  8.22-8.09 (m, 1H), 7.92 (d,  $J = 7.2$  Hz, 2H), 7.79 (d,  $J = 7.1$  Hz, 2H), 7.64 (d,  $J = 9.1$  Hz, 2H), 7.62-7.53 (m, 2H), 7.53-7.42 (m,

4H), 7.38-7.28 (m, 1H).  $^{13}\text{C}$  NMR (101 MHz,  $\text{CDCl}_3$ , ppm)  $\delta$  195.7, 141.3, 140.0, 139.7, 136.8, 133.7, 133.3, 132.9, 130.2, 130.2, 130.1, 129.1, 128.5, 128.2, 128.1. QTOF-MS  $m/z$   $[\text{M} + \text{Na}]^+$  Calcd for  $\text{C}_{19}\text{H}_{14}\text{O}_3\text{SNa}^+$  345.0556; Found 345.0551.

**methyl 2-(phenylsulfonyl)benzoate (3qa)**<sup>S6</sup>

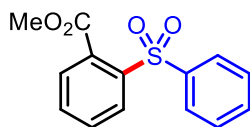

**3qa** was obtained in 53% yield (29.2 mg) according to the general procedure (petroleum ether/EtOAc, 10:1): white solid.  $^1\text{H}$  NMR (400 MHz,  $\text{CDCl}_3$ , ppm)  $\delta$  8.20-8.10 (m, 1H), 7.97 (d,  $J = 7.1$  Hz, 2H), 7.67-7.61 (m, 2H), 7.61-7.55 (m, 2H), 7.52 (t,  $J = 7.4$  Hz, 2H), 3.92 (s, 3H).  $^{13}\text{C}$  NMR (101 MHz,  $\text{CDCl}_3$ , ppm)  $\delta$  167.7, 141.5, 139.0, 133.3, 133.2, 130.9, 130.2, 129.2, 129.0, 127.8, 53.0, 29.7. QTOF-MS  $m/z$   $[\text{M} + \text{Na}]^+$  Calcd for  $\text{C}_{14}\text{H}_{12}\text{O}_4\text{SNa}^+$  299.0349; Found 299.0349.

**4-(phenylsulfonyl)-2-(trifluoromethyl)benzonitrile (3ra)**<sup>S1</sup>

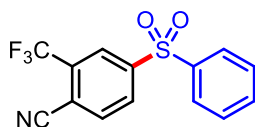

**3ra** was obtained in 91% yield (56.6 mg) according to the general procedure (petroleum ether/EtOAc, 10:1): white solid.  $^1\text{H}$  NMR (400 MHz,  $\text{CDCl}_3$ , ppm)  $\delta$  8.33 (s, 1H), 8.24 (d,  $J = 8.1$  Hz, 1H), 8.10-7.88 (m, 3H), 7.68 (t,  $J = 7.4$  Hz, 1H), 7.59 (t,  $J = 7.6$  Hz, 2H).  $^{13}\text{C}$  NMR (101 MHz,  $\text{CDCl}_3$ , ppm)  $\delta$  146.6, 139.3, 135.8, 134.6, 134.3 (d,  $^2J_{\text{C-F}} = 33.7$  Hz), 131.3, 130.0, 128.2, 125.8 (q,  $^3J_{\text{C-F}} = 4.5$  Hz), 121.5 (d,  $^1J_{\text{C-F}} = 274.9$  Hz), 114.5, 114.0.  $^{19}\text{F}$  NMR (377 MHz,  $\text{CDCl}_3$ , ppm)  $\delta$  -62.1. QTOF-MS  $m/z$   $[\text{M} + \text{Na}]^+$  Calcd for  $\text{C}_{14}\text{H}_8\text{F}_3\text{NO}_2\text{SNa}^+$  334.0120; Found 334.0133.

**3-(phenylsulfonyl)-5-(trifluoromethyl)benzonitrile (3sa)**<sup>S1</sup>

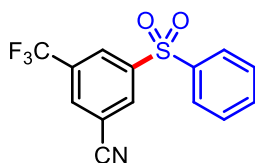

**3sa** was obtained in 71% yield (44.2 mg) according to the general procedure (petroleum ether/EtOAc, 10:1): white solid.  $^1\text{H}$  NMR (400 MHz,  $\text{CDCl}_3$ , ppm)  $\delta$  8.39 (d,  $J = 12.6$  Hz, 2H), 8.08 (s, 1H), 7.99 (d,  $J = 7.1$  Hz, 2H), 7.69 (t,  $J = 7.4$  Hz, 1H), 7.61 (t,  $J = 7.5$  Hz, 2H).  $^{13}\text{C}$  NMR (101 MHz,  $\text{CDCl}_3$ , ppm)  $\delta$  145.1, 139.3, 134.6, 134.3, 133.5 (d,  $^2J_{\text{C-F}} = 34.9$  Hz), 133.0 (q,  $^3J_{\text{C-F}} = 3.4$  Hz), 130.0, 128.3 (q,  $^3J_{\text{C-F}} = 3.6$  Hz), 128.2, 122.0 (q,  $^1J_{\text{C-F}} = 273.8$  Hz), 115.7, 115.2.  $^{19}\text{F}$

NMR (377 MHz, CDCl<sub>3</sub>, ppm)  $\delta$  -63.1. QTOF-MS  $m/z$  [M + Na]<sup>+</sup> Calcd for C<sub>14</sub>H<sub>8</sub>F<sub>3</sub>NO<sub>2</sub>SNa<sup>+</sup> 334.0120; Found 334.0137.

**5-(phenylsulfonyl)benzo[d][1,3]dioxole (3ta)**<sup>S1</sup>

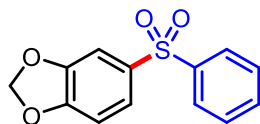

**3ta** was obtained in 26% yield (13.6 mg) based on 5-bromobenzo[d][1,3]dioxole, 43% yield (22.5 mg) based on 5-iodobenzo[d][1,3]dioxole according to the general procedure (petroleum ether/EtOAc, 10:1): white solid. <sup>1</sup>H NMR (400 MHz, CDCl<sub>3</sub>, ppm)  $\delta$  7.91 (d,  $J$  = 7.0 Hz, 2H), 7.59-7.53 (m, 2H), 7.50 (t,  $J$  = 7.3 Hz, 2H), 7.32 (d,  $J$  = 1.8 Hz, 1H), 6.88 (d,  $J$  = 8.2 Hz, 1H), 6.05 (s, 2H). <sup>13</sup>C NMR (101 MHz, CDCl<sub>3</sub>, ppm)  $\delta$  151.9, 148.4, 142.0, 134.9, 133.0, 129.2, 127.4, 123.6, 108.5, 107.9, 102.4. QTOF-MS  $m/z$  [M + Na]<sup>+</sup> Calcd for C<sub>13</sub>H<sub>10</sub>O<sub>4</sub>SNa<sup>+</sup> 285.0192; Found 285.0197.

**2-(phenylsulfonyl)naphthalene (3ua)**<sup>S1</sup>

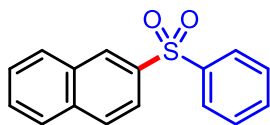

**3ua** was obtained in 54% yield (28.9 mg) according to the general procedure (petroleum ether/EtOAc, 10:1): white solid. <sup>1</sup>H NMR (400 MHz, CDCl<sub>3</sub>, ppm)  $\delta$  8.58 (s, 1H), 8.00 (t,  $J$  = 7.1 Hz, 3H), 7.93 (d,  $J$  = 8.7 Hz, 1H), 7.87 (t,  $J$  = 7.8 Hz, 2H), 7.63 (ddd,  $J$  = 14.4, 7.1, 1.5 Hz, 2H), 7.57-7.46 (m, 3H). <sup>13</sup>C NMR (101 MHz, CDCl<sub>3</sub>, ppm)  $\delta$  141.6, 138.4, 135.0, 133.2, 132.2, 129.7, 129.4, 129.3, 129.2, 129.1, 127.9, 127.7, 127.6, 122.7. QTOF-MS  $m/z$  [M + Na]<sup>+</sup> Calcd for C<sub>16</sub>H<sub>12</sub>O<sub>2</sub>SNa<sup>+</sup> 291.0450; Found 291.0454.

**2-(phenylsulfonyl)pyridine (3va)**<sup>S7</sup>

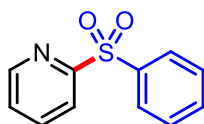

**3va** was obtained in 63% yield (27.6 mg) according to the general procedure (petroleum ether/EtOAc, 10:1): white solid. <sup>1</sup>H NMR (400 MHz, CDCl<sub>3</sub>, ppm)  $\delta$  8.68 (d,  $J$  = 4.7 Hz, 1H), 8.21 (d,  $J$  = 7.9 Hz, 1H), 8.07 (d,  $J$  = 7.1 Hz, 2H), 7.93 (td,  $J$  = 7.8, 1.7 Hz, 1H), 7.62 (t,  $J$  = 7.4 Hz, 1H), 7.54 (t,  $J$  = 7.5 Hz, 2H), 7.46 (ddd,  $J$  = 7.7, 4.7, 1.1 Hz, 1H). <sup>13</sup>C NMR (101 MHz, CDCl<sub>3</sub>,

ppm)  $\delta$  158.9, 150.5, 139.0, 138.1, 133.8, 129.1, 128.9, 126.9, 122.2. QTOF-MS  $m/z$   $[M + Na]^+$   
Calcd for  $C_{11}H_9NO_2SNa^+$  242.0246; Found 242.0251.

#### 6-(phenylsulfonyl)picolinonitrile (**3wa**)<sup>S1</sup>

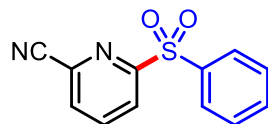

**3wa** was obtained in 50% yield (24.4 mg) according to the general procedure (petroleum ether/EtOAc, 10:1): white solid. <sup>1</sup>H NMR (400 MHz, CDCl<sub>3</sub>, ppm)  $\delta$  8.42 (dd,  $J$  = 8.0, 1.0 Hz, 1H), 8.20-7.98 (m, 3H), 7.84 (dd,  $J$  = 7.8, 1.0 Hz, 1H), 7.69 (t,  $J$  = 7.5 Hz, 1H), 7.59 (t,  $J$  = 7.7 Hz, 2H). <sup>13</sup>C NMR (101 MHz, CDCl<sub>3</sub>, ppm)  $\delta$  160.5, 139.7, 137.4, 134.5, 134.3, 131.1, 129.4, 129.4, 124.8, 115.7. QTOF-MS  $m/z$   $[M + Na]^+$  Calcd for  $C_{12}H_8N_2O_2SNa^+$  267.0199; Found 267.0187.

#### 2-phenyl-6-(phenylsulfonyl)pyridine (**3xa**)<sup>S8</sup>

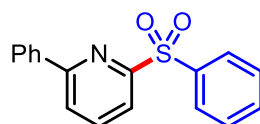

**3xa** was obtained in 42% yield (24.8 mg) according to the general procedure (petroleum ether/EtOAc, 10:1): white solid. <sup>1</sup>H NMR (400 MHz, CDCl<sub>3</sub>, ppm)  $\delta$  8.16 (d,  $J$  = 7.1 Hz, 2H), 8.11 (d,  $J$  = 7.2 Hz, 1H), 8.02-7.91 (m, 3H), 7.87 (d,  $J$  = 7.4 Hz, 1H), 7.62 (t,  $J$  = 7.4 Hz, 1H), 7.56 (t,  $J$  = 7.5 Hz, 2H), 7.49-7.40 (m, 3H). <sup>13</sup>C NMR (101 MHz, CDCl<sub>3</sub>, ppm)  $\delta$  158.7, 158.0, 138.9, 138.7, 137.1, 133.7, 130.1, 129.2, 128.9, 128.8, 127.0, 123.1, 119.8. QTOF-MS  $m/z$   $[M + Na]^+$  Calcd for  $C_{17}H_{13}NO_2SNa^+$  318.0559; Found 318.0544.

#### 4-(phenylsulfonyl)pyridine (**3ya**)<sup>S1</sup>

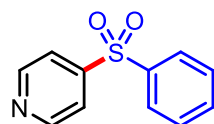

**3ya** was obtained in 72% yield (31.5 mg) according to the general procedure (petroleum ether/EtOAc, 10:1): white solid. <sup>1</sup>H NMR (400 MHz, CDCl<sub>3</sub>, ppm)  $\delta$  8.83 (dd,  $J$  = 4.5, 1.6 Hz, 2H), 7.98 (d,  $J$  = 7.1 Hz, 2H), 7.77 (dd,  $J$  = 4.5, 1.6 Hz, 2H), 7.65 (t,  $J$  = 7.4 Hz, 1H), 7.57 (t,  $J$  = 7.5 Hz, 2H). <sup>13</sup>C NMR (101 MHz, CDCl<sub>3</sub>, ppm)  $\delta$  151.2, 149.8, 139.7, 134.2, 129.7, 128.2, 120.6. QTOF-MS  $m/z$   $[M + Na]^+$  Calcd for  $C_{11}H_9NO_2SNa^+$  242.0246; Found 242.0253.

### 2-methyl-4-(phenylsulfonyl)pyridine (**3za**)<sup>S9</sup>

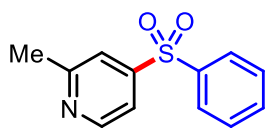

**3za** was obtained in 52% yield (24.2 mg) according to the general procedure (petroleum ether/EtOAc, 10:1): white solid. <sup>1</sup>H NMR (400 MHz, CDCl<sub>3</sub>, ppm) δ 8.69 (d, *J* = 5.2 Hz, 1H), 7.97 (d, *J* = 8.3 Hz, 2H), 7.64 (t, *J* = 8.0 Hz, 2H), 7.56 (t, *J* = 7.8 Hz, 3H), 2.64 (s, 3H). <sup>13</sup>C NMR (101 MHz, CDCl<sub>3</sub>, ppm) δ 160.7, 150.6, 149.9, 139.9, 134.1, 129.6, 128.1, 120.1, 117.7, 24.7. QTOF-MS *m/z* [M + Na]<sup>+</sup> Calcd for C<sub>12</sub>H<sub>11</sub>NO<sub>2</sub>SNa<sup>+</sup> 256.0403; Found 256.0432.

### 3-(phenylsulfonyl)quinoline (**3a'a**)<sup>S2</sup>

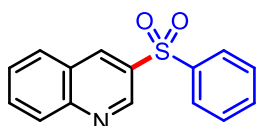

**3a'a** was obtained in 88% yield (47.3 mg) according to the general procedure (petroleum ether/EtOAc, 10:1): white solid. <sup>1</sup>H NMR (400 MHz, CDCl<sub>3</sub>, ppm) δ 9.28 (d, *J* = 2.3 Hz, 1H), 8.83 (d, *J* = 2.1 Hz, 1H), 8.17 (d, *J* = 8.5 Hz, 1H), 8.04 (d, *J* = 7.1 Hz, 2H), 7.98 (d, *J* = 8.2 Hz, 1H), 7.89 (ddd, *J* = 8.5, 7.0, 1.4 Hz, 1H), 7.69 (ddd, *J* = 8.1, 7.1, 1.0 Hz, 1H), 7.61 (t, *J* = 7.3 Hz, 1H), 7.55 (t, *J* = 7.3 Hz, 2H). <sup>13</sup>C NMR (101 MHz, CDCl<sub>3</sub>, ppm) δ 149.4, 147.1, 141.0, 137.0, 134.7, 133.8, 132.8, 129.6, 129.6, 129.2, 128.4, 127.8, 126.4. QTOF-MS *m/z* [M + Na]<sup>+</sup> Calcd for C<sub>15</sub>H<sub>11</sub>NO<sub>2</sub>SNa<sup>+</sup> 292.0403; Found 292.0380.

### 2-(phenylsulfonyl)quinoline (**3b'a**)<sup>S1</sup>

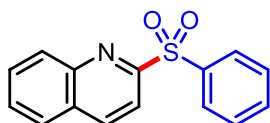

**3b'a** was obtained in 45% yield (24.1 mg) according to the general procedure (petroleum ether/EtOAc, 10:1): white solid. <sup>1</sup>H NMR (400 MHz, CDCl<sub>3</sub>, ppm) δ 8.39 (d, *J* = 8.5 Hz, 1H), 8.30-8.07 (m, 4H), 7.89 (d, *J* = 8.1 Hz, 1H), 7.80 (t, *J* = 7.7 Hz, 1H), 7.67 (t, *J* = 7.5 Hz, 1H), 7.61 (t, *J* = 7.3 Hz, 1H), 7.54 (t, *J* = 7.5 Hz, 2H). <sup>13</sup>C NMR (101 MHz, CDCl<sub>3</sub>, ppm) δ 158.1, 147.5, 139.1, 138.7, 133.7, 131.0, 130.4, 129.2, 129.1, 129.1, 128.9, 127.7, 117.7. QTOF-MS *m/z* [M + Na]<sup>+</sup> Calcd for C<sub>15</sub>H<sub>11</sub>NO<sub>2</sub>SNa<sup>+</sup> 292.0403; Found 292.0378.

### 4-((4-fluorophenyl)sulfonyl)benzotrile (**3ab**)<sup>S1</sup>

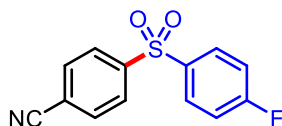

**3ab** was obtained in 83% yield (43.3 mg) according to the general procedure (petroleum ether/EtOAc, 10:1): white solid.  $^1\text{H}$  NMR (400 MHz,  $\text{CDCl}_3$ , ppm)  $\delta$  8.04 (d,  $J = 8.6$  Hz, 2H), 7.97 (dd,  $J = 8.9, 5.0$  Hz, 2H), 7.81 (d,  $J = 8.6$  Hz, 2H), 7.26-7.19 (m, 2H).  $^{13}\text{C}$  NMR (101 MHz,  $\text{CDCl}_3$ , ppm)  $\delta$  166.0 (d,  $^1J_{\text{C-F}} = 257.6$  Hz), 145.7, 136.2, 133.2, 130.9 (d,  $^3J_{\text{C-F}} = 9.6$  Hz), 128.2, 117.1, 117.1 (d,  $^2J_{\text{C-F}} = 22.7$  Hz), 117.1.  $^{19}\text{F}$  NMR (377 MHz,  $\text{CDCl}_3$ , ppm)  $\delta$  -102.3. QTOF-MS  $m/z$   $[\text{M} + \text{Na}]^+$  Calcd for  $\text{C}_{13}\text{H}_8\text{FNO}_2\text{SNa}^+$  284.0152; Found 284.0167.

#### 4-((4-chlorophenyl)sulfonyl)benzonitrile (**3ac**)<sup>S2</sup>

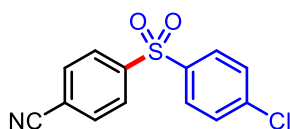

**3ac** was obtained in 57% yield (31.6 mg) according to the general procedure (petroleum ether/EtOAc, 10:1): white solid.  $^1\text{H}$  NMR (400 MHz,  $\text{CDCl}_3$ , ppm)  $\delta$  8.04 (d,  $J = 8.7$  Hz, 2H), 7.89 (d,  $J = 8.8$  Hz, 2H), 7.81 (d,  $J = 8.7$  Hz, 2H), 7.52 (d,  $J = 8.8$  Hz, 2H).  $^{13}\text{C}$  NMR (101 MHz,  $\text{CDCl}_3$ , ppm)  $\delta$  145.5, 141.0, 138.6, 133.2, 130.0, 129.4, 128.3, 117.2, 117.0. QTOF-MS  $m/z$   $[\text{M} + \text{Na}]^+$  Calcd for  $\text{C}_{13}\text{H}_8\text{ClNO}_2\text{SNa}^+$  299.9856; Found 299.9878.

#### 4-tosylbenzonitrile (**3ad**)<sup>S1</sup>

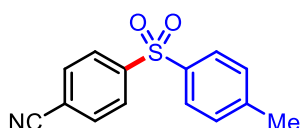

**3ad** was obtained in 65% yield (33.4 mg) according to the general procedure (petroleum ether/EtOAc, 10:1): white solid.  $^1\text{H}$  NMR (400 MHz,  $\text{CDCl}_3$ , ppm)  $\delta$  8.04 (d,  $J = 8.6$  Hz, 2H), 7.83 (d,  $J = 8.3$  Hz, 2H), 7.79 (d,  $J = 8.6$  Hz, 2H), 7.34 (d,  $J = 8.1$  Hz, 2H), 2.42 (s, 3H).  $^{13}\text{C}$  NMR (101 MHz,  $\text{CDCl}_3$ , ppm)  $\delta$  146.3, 145.3, 137.1, 133.0, 130.3, 128.1, 128.0, 117.2, 116.7, 21.6. QTOF-MS  $m/z$   $[\text{M} + \text{Na}]^+$  Calcd for  $\text{C}_{14}\text{H}_{11}\text{NO}_2\text{SNa}^+$  280.0403; Found 280.0431.

#### 4-((4-(tert-butyl)phenyl)sulfonyl)benzonitrile (**3ae**)<sup>S1</sup>

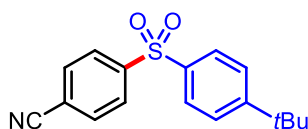

**3ae** was obtained in 89% yield (53.2mg) according to the general procedure (petroleum ether/EtOAc, 10:1): white solid. <sup>1</sup>H NMR (400 MHz, CDCl<sub>3</sub>, ppm) δ 8.05 (d, *J* = 8.5 Hz, 2H), 7.86 (d, *J* = 8.6 Hz, 2H), 7.79 (d, *J* = 8.5 Hz, 2H), 7.55 (d, *J* = 8.6 Hz, 2H), 1.32 (s, 9H). <sup>13</sup>C NMR (101 MHz, CDCl<sub>3</sub>, ppm) δ 158.2, 146.2, 137.0, 133.0, 128.2, 127.9, 126.7, 117.2, 116.7, 35.3, 31.0. QTOF-MS *m/z* [M + Na]<sup>+</sup> Calcd for C<sub>17</sub>H<sub>17</sub>NO<sub>2</sub>SNa<sup>+</sup> 322.0872; Found 322.0859.

#### 4-((4-methoxyphenyl)sulfonyl)benzonitrile (**3af**)<sup>S1</sup>

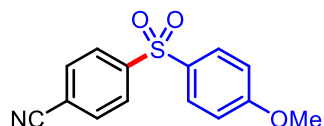

**3af** was obtained in 59% yield (32.2 mg) according to the general procedure (petroleum ether/EtOAc, 10:1): white solid. <sup>1</sup>H NMR (400 MHz, CDCl<sub>3</sub>, ppm) δ 8.02 (d, *J* = 8.7 Hz, 2H), 7.88 (d, *J* = 9.0 Hz, 2H), 7.78 (d, *J* = 8.7 Hz, 2H), 7.00 (d, *J* = 9.0 Hz, 2H), 3.86 (s, 3H). <sup>13</sup>C NMR (101 MHz, CDCl<sub>3</sub>, ppm) δ 164.1, 146.6, 133.0, 131.4, 130.3, 128.0, 117.2, 116.5, 114.9, 55.8. QTOF-MS *m/z* [M + Na]<sup>+</sup> Calcd for C<sub>14</sub>H<sub>11</sub>NO<sub>3</sub>SNa<sup>+</sup> 296.0352; Found 296.0359.

#### 4-((m-tolyl)sulfonyl)benzonitrile (**3ag**)<sup>S1</sup>

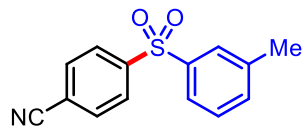

**3ag** was obtained in 55% yield (28.3 mg) according to the general procedure (petroleum ether/EtOAc, 10:1): white solid. <sup>1</sup>H NMR (400 MHz, CDCl<sub>3</sub>, ppm) δ 8.05 (d, *J* = 8.4 Hz, 2H), 7.80 (d, *J* = 8.5 Hz, 2H), 7.75 (s, 2H), 7.47-7.39 (m, 2H), 2.42 (s, 3H). <sup>13</sup>C NMR (101 MHz, CDCl<sub>3</sub>, ppm) δ 146.0, 140.0, 139.9, 134.9, 133.1, 129.5, 128.3, 128.2, 125.2, 117.2, 116.8, 21.4. QTOF-MS *m/z* [M + Na]<sup>+</sup> Calcd for C<sub>14</sub>H<sub>11</sub>NO<sub>2</sub>SNa<sup>+</sup> 280.0403; Found 280.0386.

#### 4-((3-(trifluoromethyl)phenyl)sulfonyl)benzonitrile (**3ah**)<sup>S1</sup>

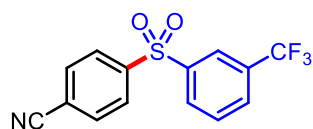

**3ah** was obtained in 62% yield (38.6 mg) according to the general procedure (petroleum ether/EtOAc, 10:1): white solid. <sup>1</sup>H NMR (400 MHz, CDCl<sub>3</sub>, ppm) δ 8.22 (s, 1H), 8.14 (d, *J* = 7.9 Hz, 1H), 8.08 (d, *J* = 8.7 Hz, 2H), 7.89 (d, *J* = 7.8 Hz, 1H), 7.84 (d, *J* = 8.7 Hz, 2H), 7.72 (t, *J* = 7.9 Hz, 1H). <sup>13</sup>C NMR (101 MHz, CDCl<sub>3</sub>, ppm) δ 144.9, 141.6, 133.3, 132.5 (d, <sup>2</sup>*J*<sub>C-F</sub> = 33.7 Hz),



131.2, 130.7 (q,  $^3J_{C-F} = 3.5$  Hz), 130.5, 128.5, 125.0 (q,  $^3J_{C-F} = 3.9$  Hz), 122.9 (d,  $^1J_{C-F} = 273.1$  Hz), 117.6, 116.9.  $^{19}\text{F}$  NMR (377 MHz,  $\text{CDCl}_3$ , ppm)  $\delta$  -62.9. QTOF-MS  $m/z$   $[\text{M} + \text{Na}]^+$  Calcd for  $\text{C}_{14}\text{H}_8\text{F}_3\text{NO}_2\text{SNa}^+$  334.0120; Found 334.0134.

#### 4-((3,5-difluorophenyl)sulfonyl)benzotrile (3ai)<sup>S1</sup>

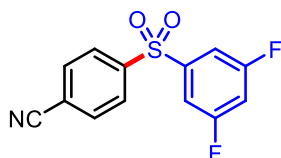

**3ai** was obtained in 82% yield (45.8 mg) according to the general procedure (petroleum ether/EtOAc, 10:1): white solid.  $^1\text{H}$  NMR (400 MHz,  $\text{CDCl}_3$ , ppm)  $\delta$  8.06 (d,  $J = 8.6$  Hz, 2H), 7.85 (d,  $J = 8.6$  Hz, 2H), 7.48 (d,  $J = 3.9$  Hz, 2H), 7.07 (t,  $J = 8.3$  Hz, 1H).  $^{13}\text{C}$  NMR (101 MHz,  $\text{CDCl}_3$ , ppm)  $\delta$  163.1 (dd,  $^1J_{C-F} = 256.9$  Hz), 144.5, 143.5 (t,  $^3J_{C-F} = 8.2$  Hz), 133.4, 128.6, 117.8, 116.9, 111.6 (dd,  $^2J_{C-F} = 28.4$  Hz), 109.8 (t,  $^2J_{C-F} = 24.9$  Hz).  $^{19}\text{F}$  NMR (377 MHz,  $\text{CDCl}_3$ , ppm)  $\delta$  -103.9. QTOF-MS  $m/z$   $[\text{M} + \text{Na}]^+$  Calcd for  $\text{C}_{13}\text{H}_7\text{F}_2\text{NO}_2\text{SNa}^+$  302.0058; Found 302.0074.

#### 4-(mesitylsulfonyl)benzotrile (3aj)<sup>S1</sup>

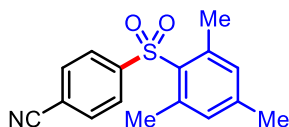

**3aj** was obtained in 58% yield (33.1 mg) according to the general procedure (petroleum ether/EtOAc, 10:1): white solid.  $^1\text{H}$  NMR (400 MHz,  $\text{CDCl}_3$ , ppm)  $\delta$  7.88 (d,  $J = 8.5$  Hz, 2H), 7.77 (d,  $J = 8.5$  Hz, 2H), 6.98 (s, 2H), 2.57 (s, 6H), 2.32 (s, 3H).  $^{13}\text{C}$  NMR (101 MHz,  $\text{CDCl}_3$ , ppm)  $\delta$  147.6, 144.4, 140.3, 132.8, 132.5, 132.3, 126.8, 117.3, 116.3, 22.8, 21.1. QTOF-MS  $m/z$   $[\text{M} + \text{Na}]^+$  Calcd for  $\text{C}_{16}\text{H}_{15}\text{NO}_2\text{SNa}^+$  308.0716; Found 308.0733.

#### 4-(naphthalen-2-ylsulfonyl)benzotrile (3ak)<sup>S1</sup>

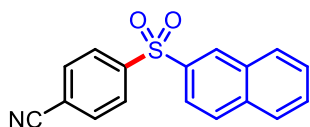

**3ak** was obtained in 60% yield (35.2 mg) according to the general procedure (petroleum ether/EtOAc, 10:1): white solid.  $^1\text{H}$  NMR (400 MHz,  $\text{CDCl}_3$ , ppm)  $\delta$  8.59 (s, 1H), 8.11 (d,  $J = 8.6$  Hz, 2H), 7.99 (dd,  $J = 13.4, 8.3$  Hz, 2H), 7.90 (d,  $J = 8.0$  Hz, 1H), 7.84 (dd,  $J = 8.7, 1.9$  Hz, 1H), 7.79 (d,  $J = 8.6$  Hz, 2H), 7.73-7.60 (m, 2H).  $^{13}\text{C}$  NMR (101 MHz,  $\text{CDCl}_3$ , ppm)  $\delta$  145.9, 136.8, 135.3, 133.1, 132.2, 130.1, 129.9, 129.7, 129.5, 128.3, 128.0, 128.0, 122.4, 117.2, 116.9.

QTOF-MS  $m/z$   $[M + Na]^+$  Calcd for  $C_{17}H_{11}NO_2SNa^+$  316.0403; Found 316.0434.

#### 4-(pyridin-3-ylsulfonyl)benzotrile (3a)<sup>S10</sup>

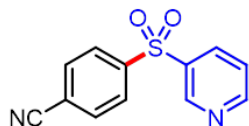

**3a** was obtained in 50% yield (24.4 mg) according to the general procedure (petroleum ether/EtOAc, 10:1): white solid.  $^1H$  NMR (400 MHz,  $CDCl_3$ , ppm)  $\delta$  9.16 (d,  $J = 2.0$  Hz, 1H), 8.85 (dd,  $J = 4.8, 1.4$  Hz, 1H), 8.23 (ddd,  $J = 8.1, 2.3, 1.7$  Hz, 1H), 8.09 (d,  $J = 8.7$  Hz, 2H), 7.85 (d,  $J = 8.7$  Hz, 2H), 7.51 (ddd,  $J = 8.1, 4.9, 0.6$  Hz, 1H).  $^{13}C$  NMR (101 MHz,  $CDCl_3$ , ppm)  $\delta$  154.4, 148.9, 144.9, 137.0, 135.5, 133.4, 128.4, 124.1, 117.6, 116.9. QTOF-MS  $m/z$   $[M + Na]^+$  Calcd for  $C_{12}H_8N_2O_2SNa^+$  267.0199; Found 267.0187.

#### 8-chloro-3-(phenylsulfonyl)quinolone (3c'a)<sup>S1</sup>

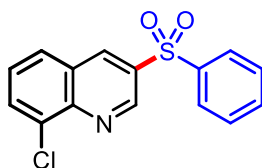

**3c'a** was obtained in 80% yield (48.5 mg) according to the general procedure (petroleum ether/EtOAc, 5:1): white solid.  $^1H$  NMR (400 MHz,  $CDCl_3$ , ppm)  $\delta$  9.37 (d,  $J = 2.2$  Hz, 1H), 8.85 (d,  $J = 2.2$  Hz, 1H), 8.03 (dd,  $J = 5.3, 3.4$  Hz, 2H), 7.99 (dd,  $J = 7.5, 1.2$  Hz, 1H), 7.91 (dd,  $J = 8.2, 1.1$  Hz, 1H), 7.70-7.58 (m, 2H), 7.58-7.51 (m, 2H).  $^{13}C$  NMR (101 MHz,  $CDCl_3$ , ppm)  $\delta$  147.8, 145.5, 140.6, 137.2, 135.8, 134.1, 134.0, 132.7, 129.7, 128.4, 128.2, 127.9, 127.8. QTOF-MS  $m/z$   $[M + Na]^+$  Calcd for  $C_{15}H_{10}ClNO_2SNa^+$  326.0013; Found 326.0028.

#### N-phenyl-2-(phenylsulfonyl)benzamide (3d'a)

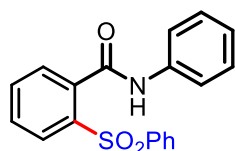

**3d'a** was obtained in 83% yield (56.0 mg) according to the general procedure (petroleum ether/EtOAc, 3:1): white solid. M.P. = 185.6-187.2 °C.  $^1H$  NMR (400 MHz,  $CDCl_3$ , ppm)  $\delta$  8.24-8.12 (m, 2H), 7.97-7.78 (m, 2H), 7.70-7.59 (m, 3H), 7.55 (dd,  $J = 14.6, 7.5$  Hz, 3H), 7.41 (t,

$J = 7.8$  Hz, 2H), 7.36 (t,  $J = 7.9$  Hz, 2H), 7.17 (t,  $J = 7.4$  Hz, 1H).  $^{13}\text{C}$  NMR (101 MHz,  $\text{CDCl}_3$ , ppm)  $\delta$  164.9, 140.2, 138.1, 137.6, 136.7, 133.8, 133.7, 130.5, 130.0, 129.2, 129.1, 129.1, 128.1, 124.9, 120.2. IR (KBr disk) 3255, 3197, 3134, 3066, 2353, 2165, 1962, 1662, 1598, 1540, 1492, 1441, 1315, 1264, 1156, 1120, 1085, 1055, 1024, 998, 971, 924, 888, 840, 754, 684  $\text{cm}^{-1}$ . QTOF-MS  $m/z$   $[\text{M} + \text{Na}]^+$  Calcd for  $\text{C}_{19}\text{H}_{15}\text{NO}_3\text{SNa}^+$  360.0665; Found 360.0687.

#### 4-((4-(9H-carbazol-9-yl)phenyl)sulfonyl)benzonitrile (4)

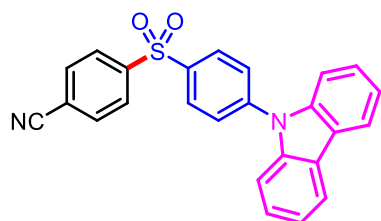

A 10 mL test tube was charged with 4-((4-fluorophenyl)sulfonyl)benzonitrile (0.4 mmol), carbazole (0.4 mmol),  $\text{K}_2\text{CO}_3$  (0.6 mmol) in degassed, dry DMF (6 mL). The reaction was stirred under a nitrogen atmosphere at 100 °C for 24 h. Next, the mixture was cooled to room temperature and poured into ice water slowly, stirred for 30 min. After that, this mixture was filtered. The filter cake was dried via suction filtration, washed with water, distilled water, anhydrous methanol, respectively. The crude product was obtained in 91% yield (148.5 mg), white solid. M.P. = 202.8-204.7 °C.  $^1\text{H}$  NMR (400 MHz,  $\text{CDCl}_3$ , ppm)  $\delta$  8.14 (dd,  $J = 15.7, 8.0$  Hz, 6H), 7.84 (d,  $J = 8.4$  Hz, 2H), 7.78 (d,  $J = 8.6$  Hz, 2H), 7.41 (q,  $J = 8.3$  Hz, 4H), 7.32 (t,  $J = 7.2$  Hz, 2H).  $^{13}\text{C}$  NMR (101 MHz,  $\text{CDCl}_3$ , ppm)  $\delta$  145.6, 143.3, 139.8, 138.0, 133.3, 129.9, 128.4, 127.3, 126.4, 124.1, 121.2, 120.6, 117.2, 117.1, 109.6. IR (KBr disk) 3098, 3057, 2231, 1587, 1500, 1443, 1312, 1240, 1212, 1148, 1100, 1011, 972, 934, 909, 839, 794, 746, 721, 679, 626  $\text{cm}^{-1}$ . QTOF-MS  $m/z$   $[\text{M} + \text{Na}]^+$  Calcd for  $\text{C}_{25}\text{H}_{16}\text{N}_2\text{O}_2\text{SNa}^+$  431.0825; Found 431.0841.

## References

- S1 D. L. Zhu, Q. Wu, H. Y. Li, H. X. Li and J. P. Lang, Hantzsch ester as a visible-light photoredox catalyst for transition-metal-free coupling of arylhalides and arylsulfonates. *Chem. Eur. J.*, 2020, **26**, 3484-3488.
- S2 M. J. Cabrera-Afonso, Z. P. Lu, C. B. Kelly, S. B. Lang, R. Dykstra, O. Gutierrez and G. A. Molander, Engaging sulfinate salts via Ni/photoredox dual catalysis enables facile Csp<sup>2</sup>-SO<sub>2</sub>R coupling, *Chem. Sci.*, 2018, **9**, 3186-3191.
- S3 N. Umierski and G. Manolikakes, Metal-free synthesis of diaryl sulfones from arylsulfonic acid salts and diaryliodonium salts, *Org. Lett.*, 2013, **15**, 188-191.
- S4 D. H. Kim, J. Lee and A. Lee, Visible-light-driven silver-catalyzed one-pot approach: A selective synthesis of diaryl sulfoxides and diaryl sulfones, *Org. Lett.*, 2018, **20**, 764-767.
- S5 R. Leardini, H. McNab, M. Minozzi and D. Nanni, Thermal decomposition of tert-butyl ortho-(phenylsulfanyl)- and ortho-(phenylsulfonyl)phenyliminoxyperacetates: The reactivity of thio-substituted iminyl radicals, *J. Chem. Soc. Perkin Trans. 1*, 2001, **9**, 1072-1078.
- S6 C. Shen, J. Xu, W. Yu and P. Zhang, A highly active and easily recoverable chitosan@copper catalyst for the C-S coupling and its application in the synthesis of zolimidine, *Green Chem.*, 2014, **16**, 3007-3012.
- S7 T. Thierry, E. Pfund and T. Lequeux, Metal-free aminomethylation of aromatic sulfones promoted by Eosin Y, *Chem. Eur. J.*, 2021, **27**, 14826-14830.
- S8 B. Qu, L. P. Samankumara, J. Savoie, D. R. Fandrick, N. Haddad, X. Wei, S. Ma, H. Lee, S. Rodriguez, C. A. Busacca, N. K. Yee, J. J. Song and C. H. Senanayake, Synthesis of pyridyl-dihydrobenzoxaphosphole ligands and their application in asymmetric hydrogenation of unfunctionalized alkenes, *J. Org. Chem.*, 2014, **79**, 993-1000.
- S9 D. Moser, Y. Duan, F. Wang, Y. Ma, M. J. O'Neill and J. Cornella, Selective functionalization of aminoheterocycles by a pyrylium salt, *Angew. Chem. Int. Ed.*, 2018, **57**, 11035-11039.
- S10 H. Yue, C. Zhu and M. Rueping, Cross-coupling of sodium sulfonates with aryl, heteroaryl, and vinyl halides by nickel/photoredox dual catalysis, *Angew. Chem. Int. Ed.*, 2018, **57**, 1371-1375.

## NMR spectra

**Fig. S7** The  $^1\text{H}$  (400 MHz),  $^{13}\text{C}$  (101 MHz) NMR spectra for 4-(phenylsulfonyl)benzonitrile (**3aa**) in  $\text{CDCl}_3$

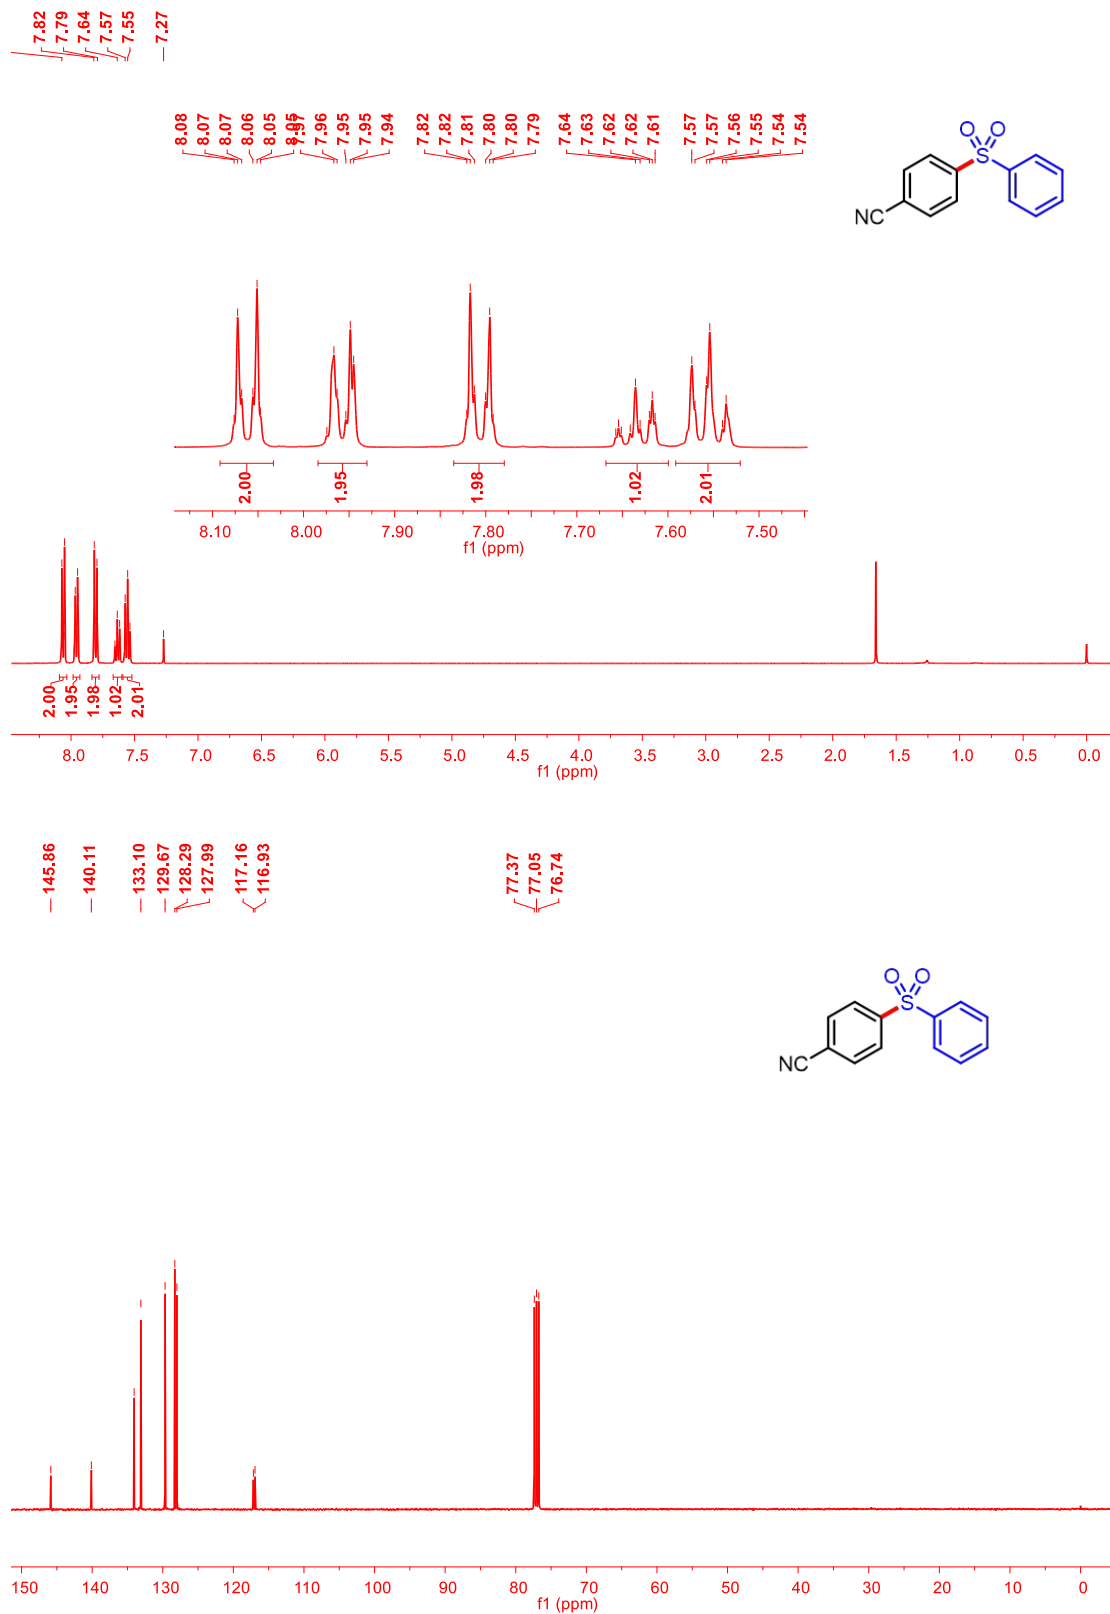

**Fig. S8** The  $^1\text{H}$  (400 MHz),  $^{13}\text{C}$  (101 MHz) NMR spectra for 1-(4-(phenylsulfonyl)phenyl)ethan-1-one (**3ba**) in  $\text{CDCl}_3$

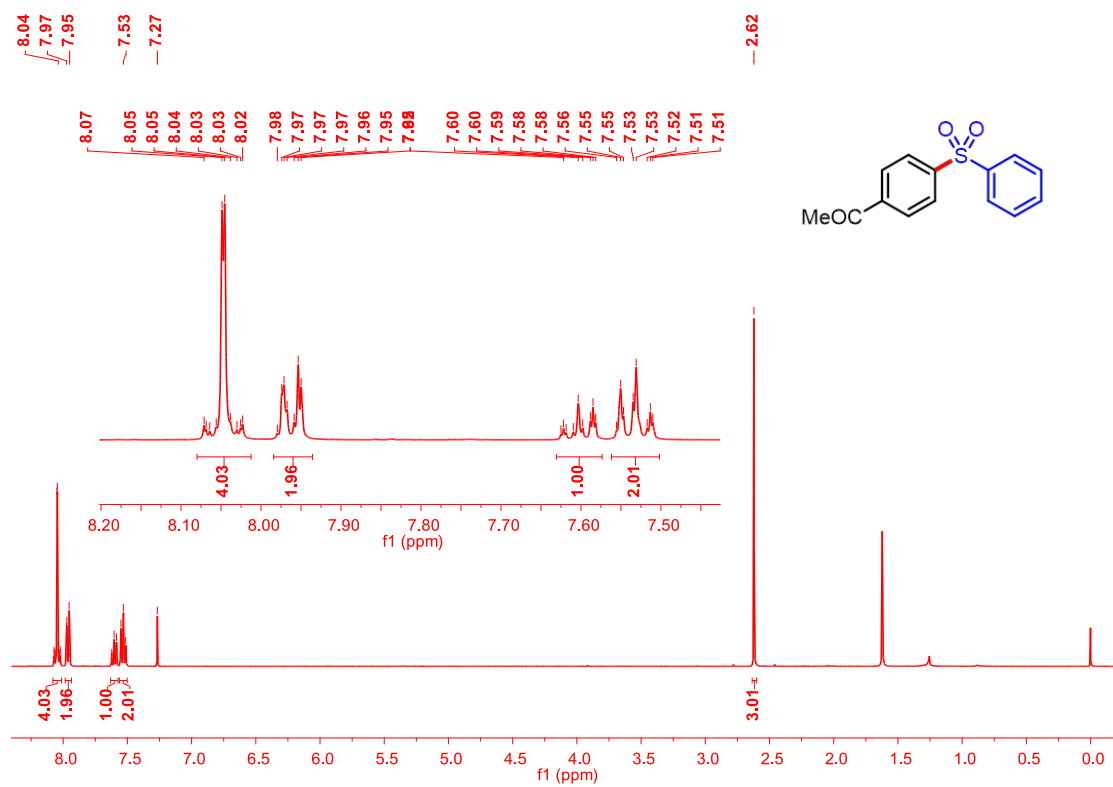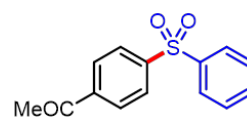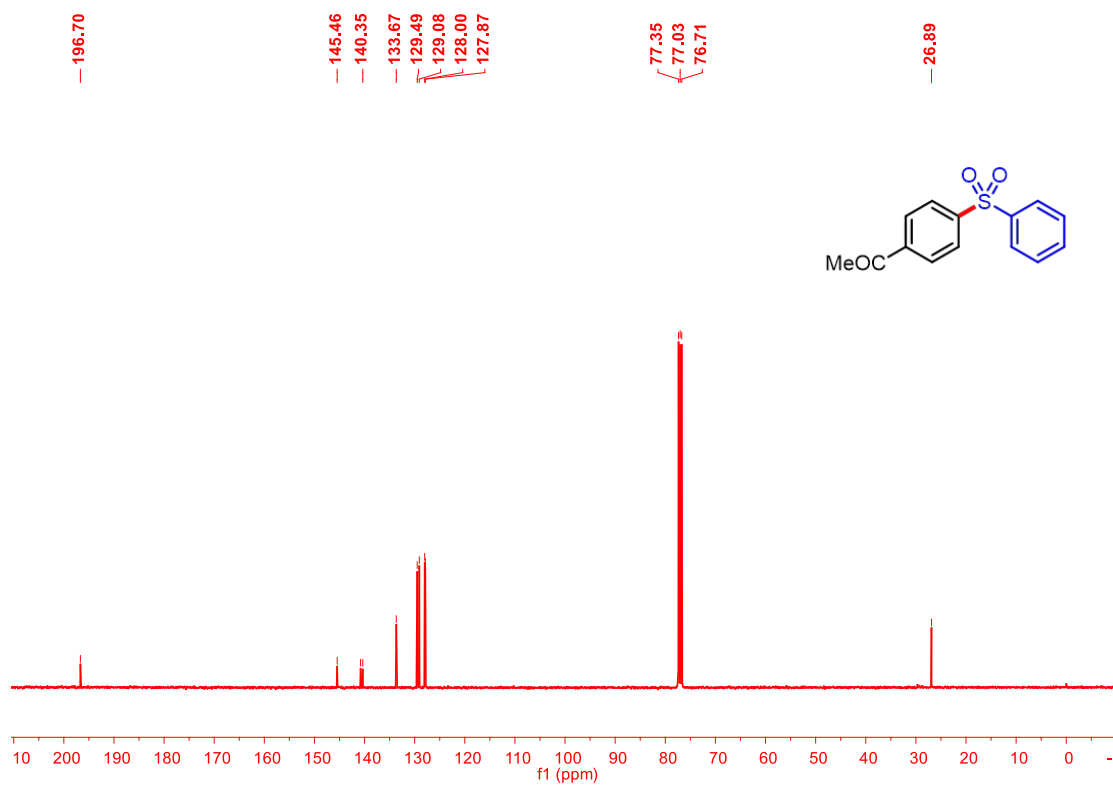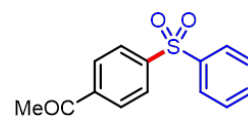

**Fig. S9** The  $^1\text{H}$  (400 MHz),  $^{13}\text{C}$  (101 MHz) NMR spectra for methyl 4-(phenylsulfonyl)benzoate (**3ca**) in  $\text{CDCl}_3$

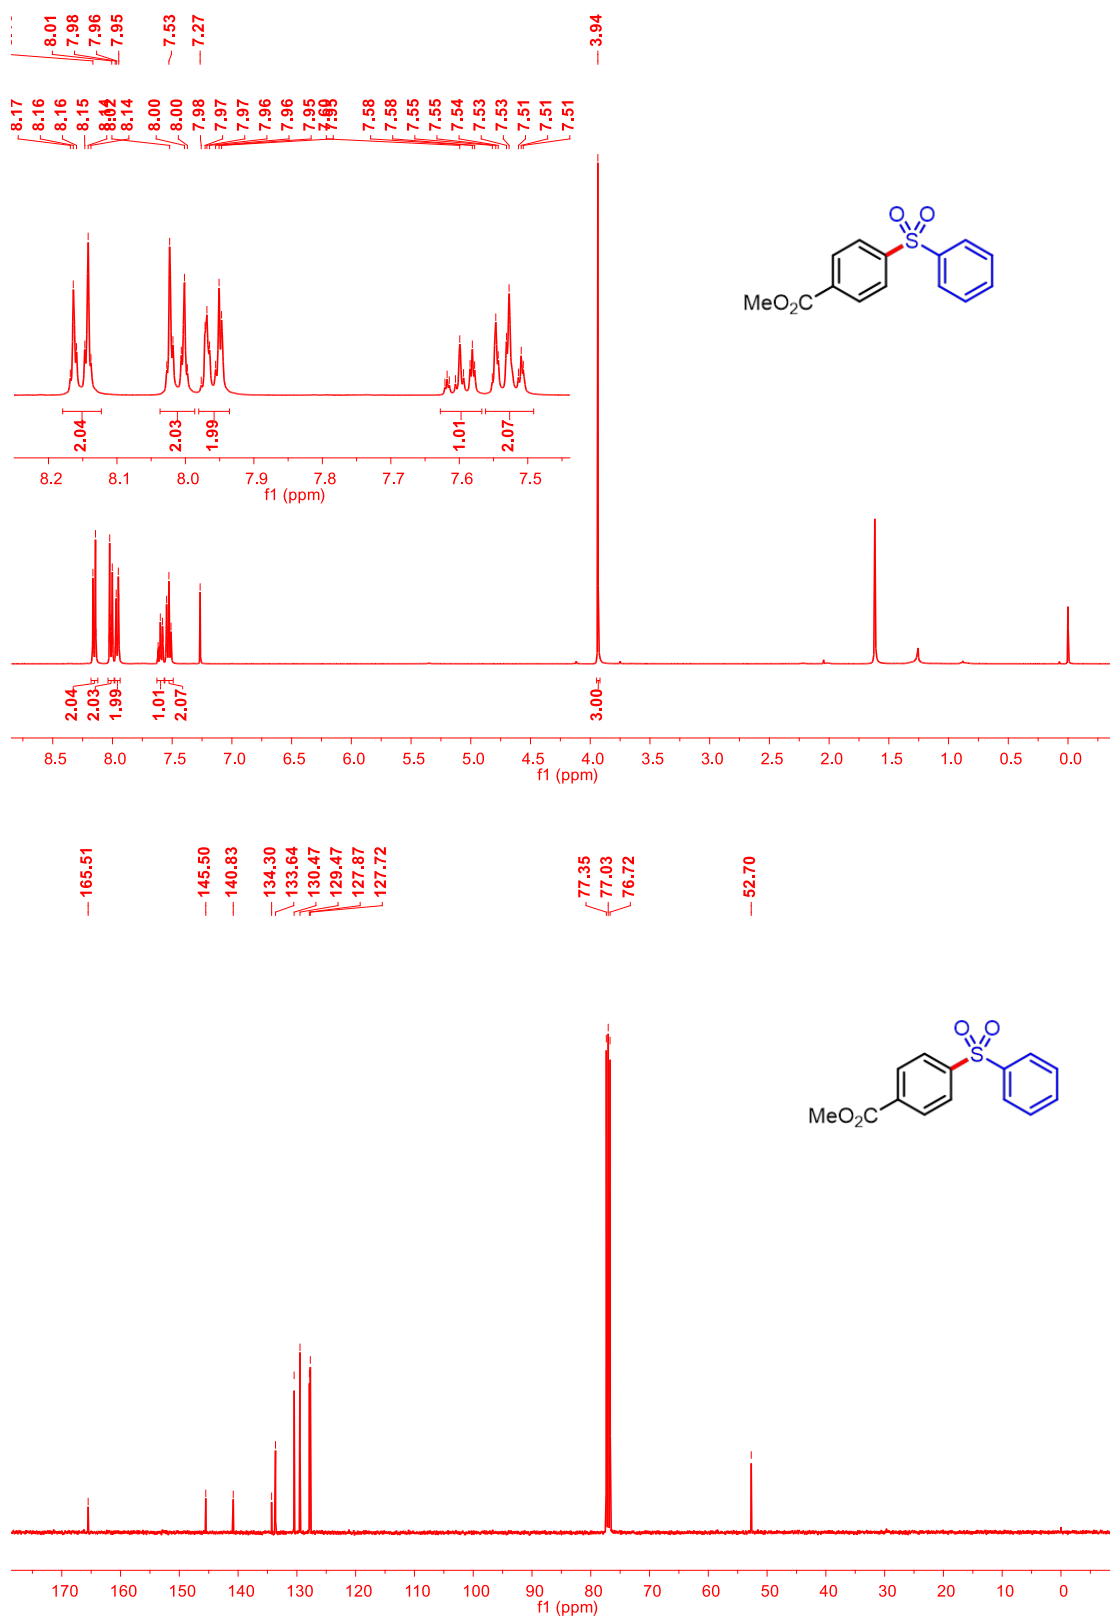

**Fig. S10** The  $^1\text{H}$  (400 MHz),  $^{13}\text{C}$  (101 MHz) NMR spectra for ethyl 4-(phenylsulfonyl)benzoate (**3da**) in  $\text{CDCl}_3$

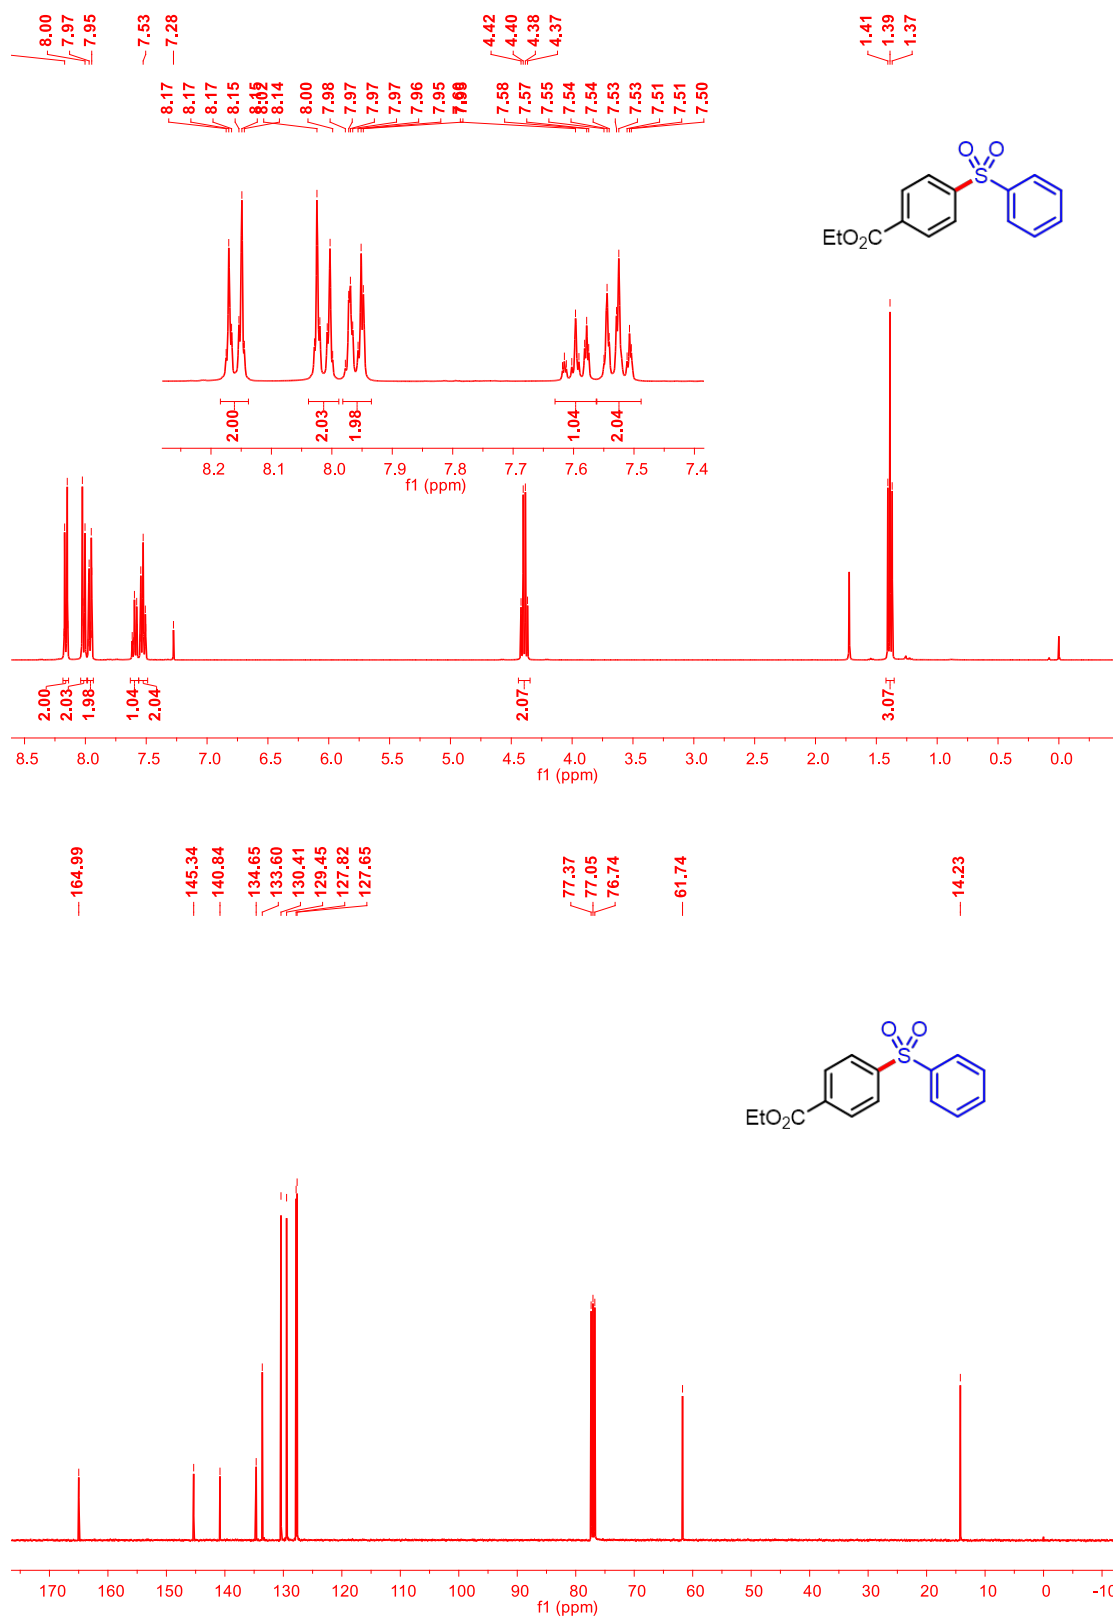



**Fig. S11** The  $^1\text{H}$  (400 MHz),  $^{13}\text{C}$  (101 MHz),  $^{19}\text{F}$  (377 MHz) NMR spectra for 1-(phenylsulfonyl)-4-(trifluoromethyl)benzene (**3ea**) in  $\text{CDCl}_3$

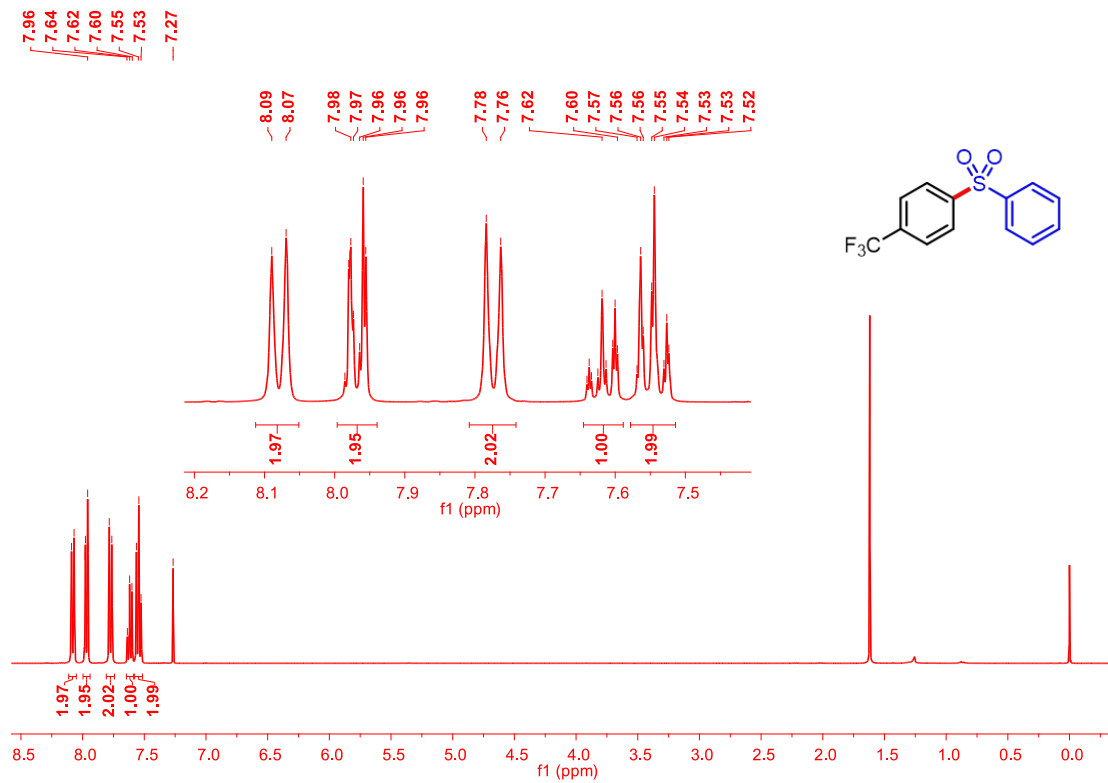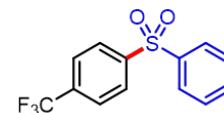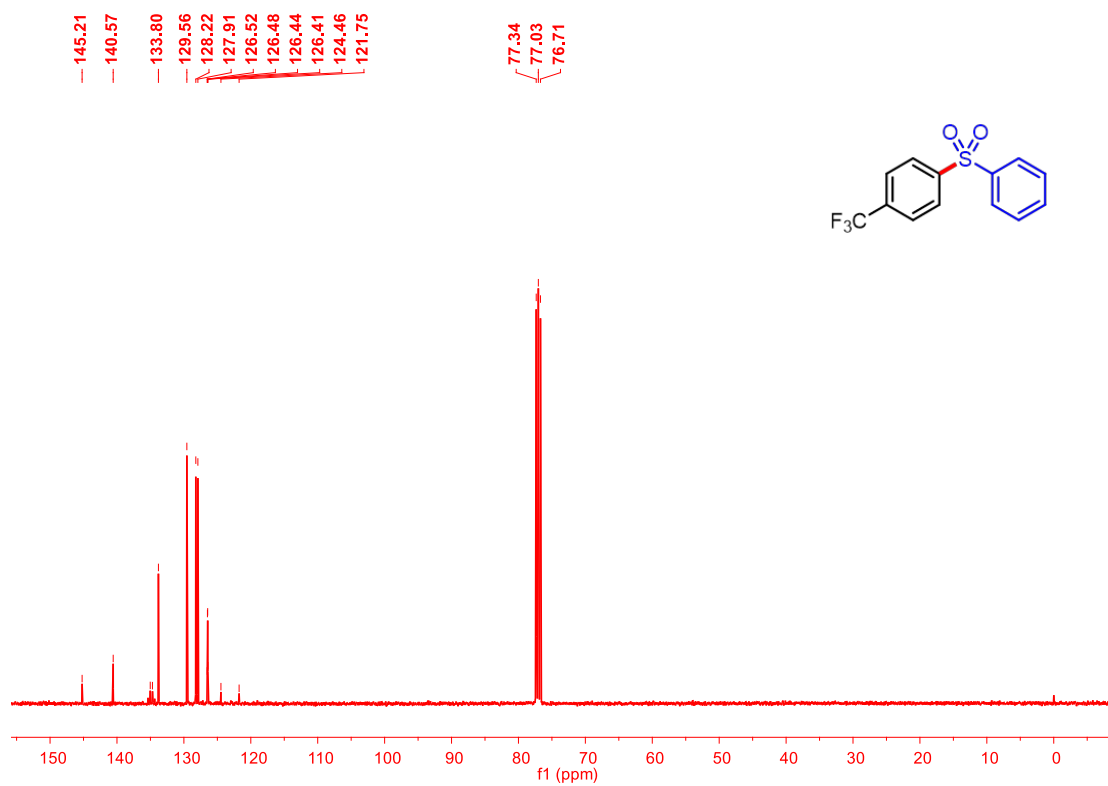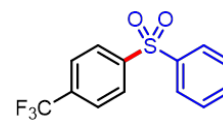

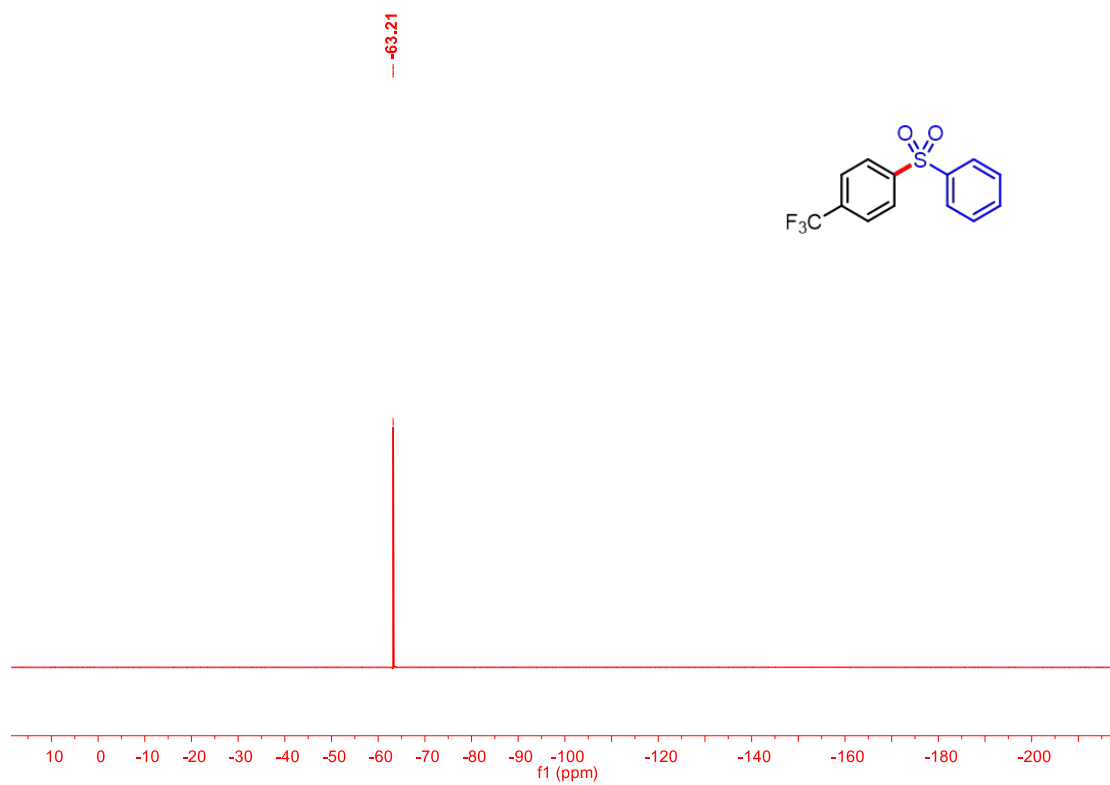

**Fig. S12** The  $^1\text{H}$  (400 MHz),  $^{13}\text{C}$  (101 MHz) NMR spectra for 4-(phenylsulfonyl)benzaldehyde (**3fa**) in  $\text{CDCl}_3$

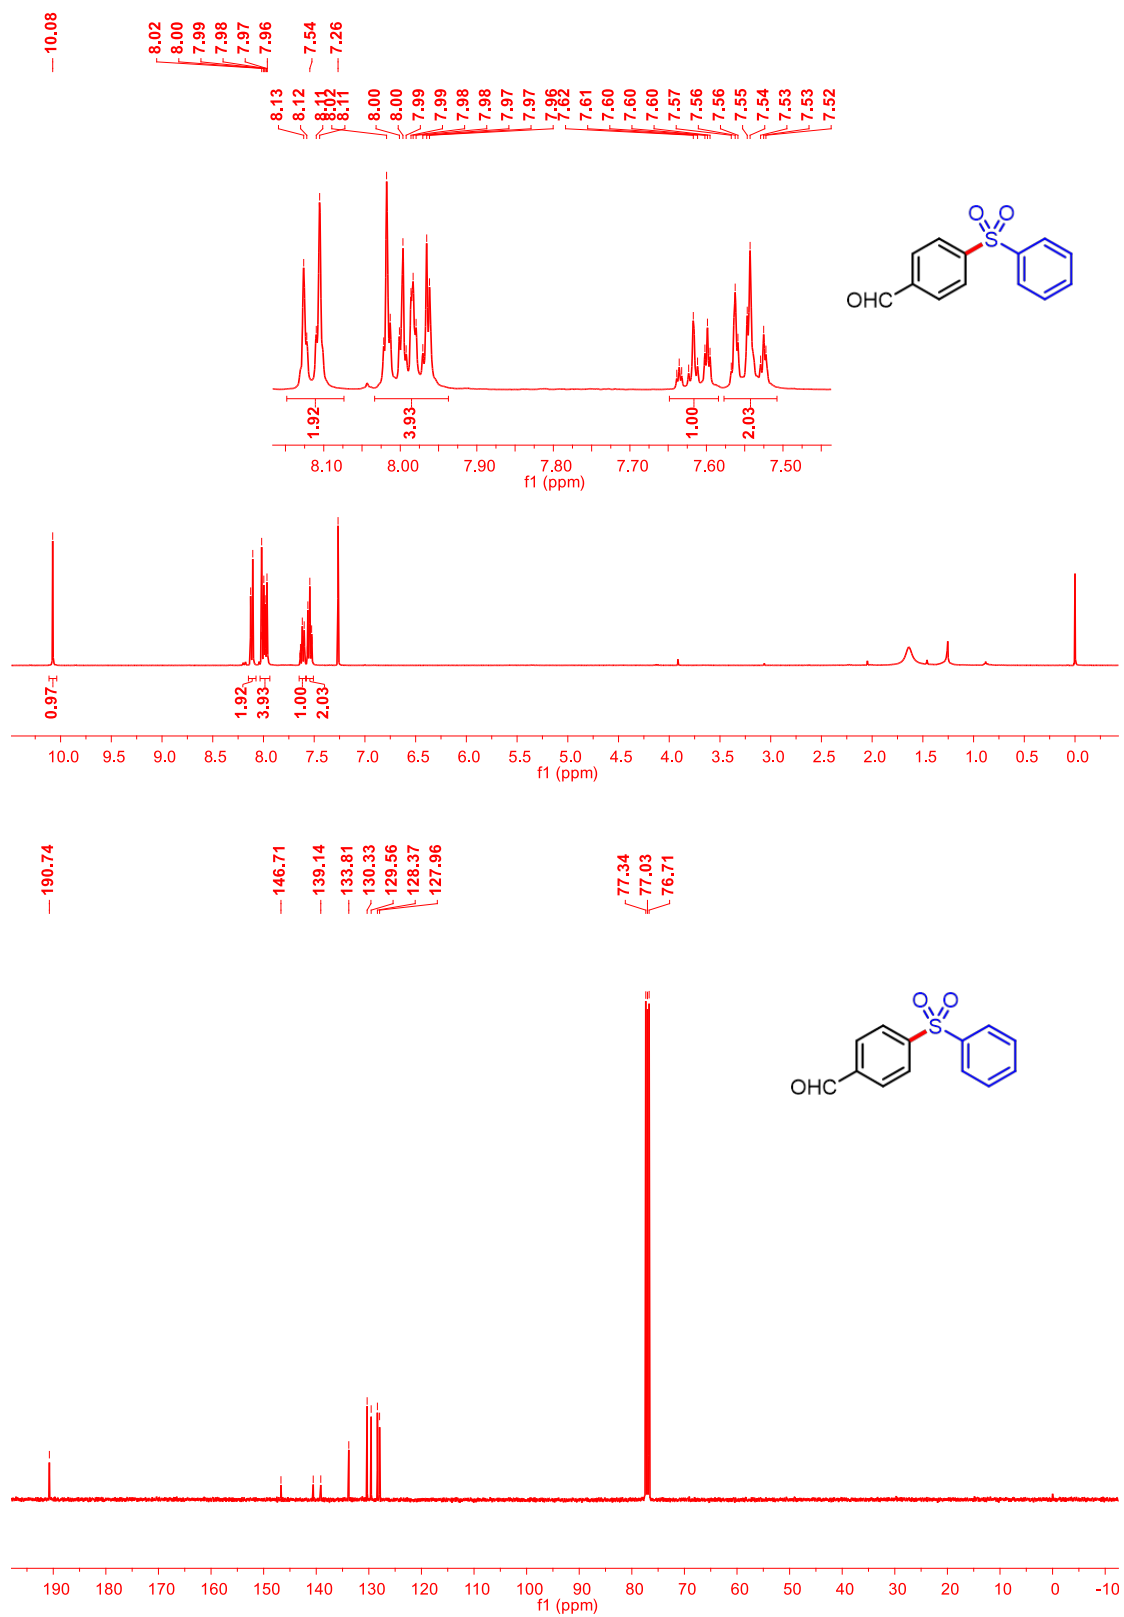

**Fig. S13** The  $^1\text{H}$  (400 MHz),  $^{13}\text{C}$  (101 MHz) NMR spectra for 1-nitro-4-(phenylsulfonyl)benzene (**3ga**) in  $\text{CDCl}_3$

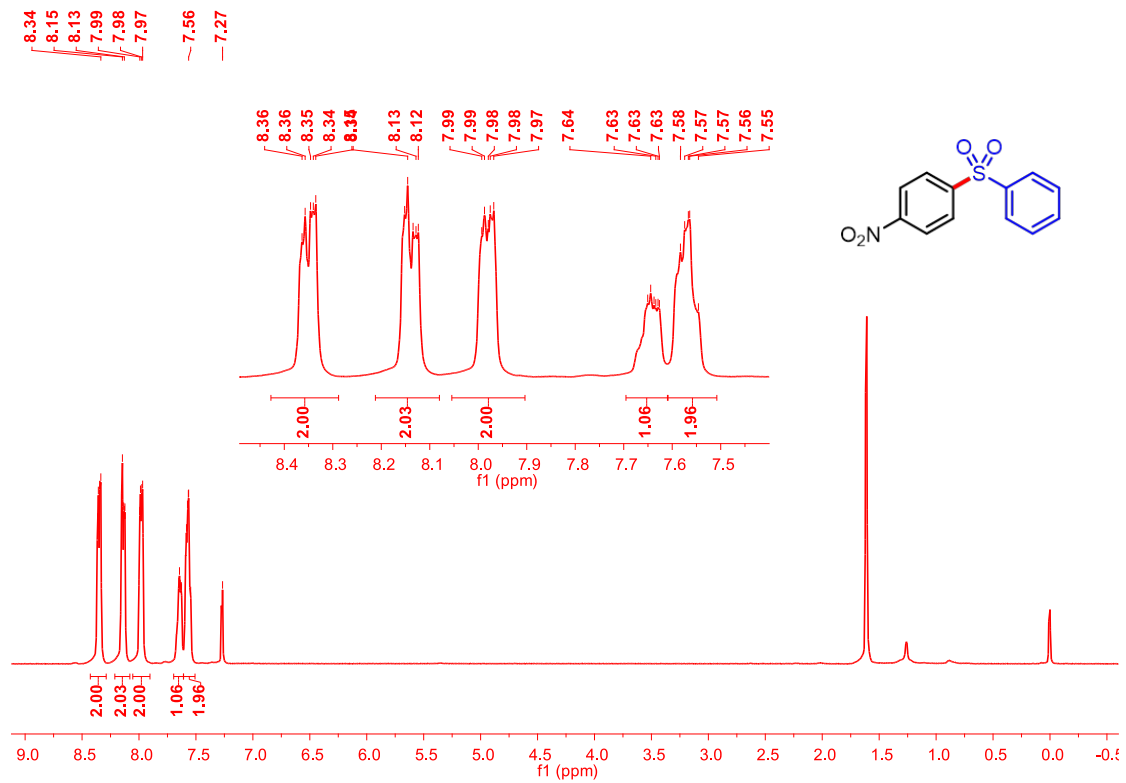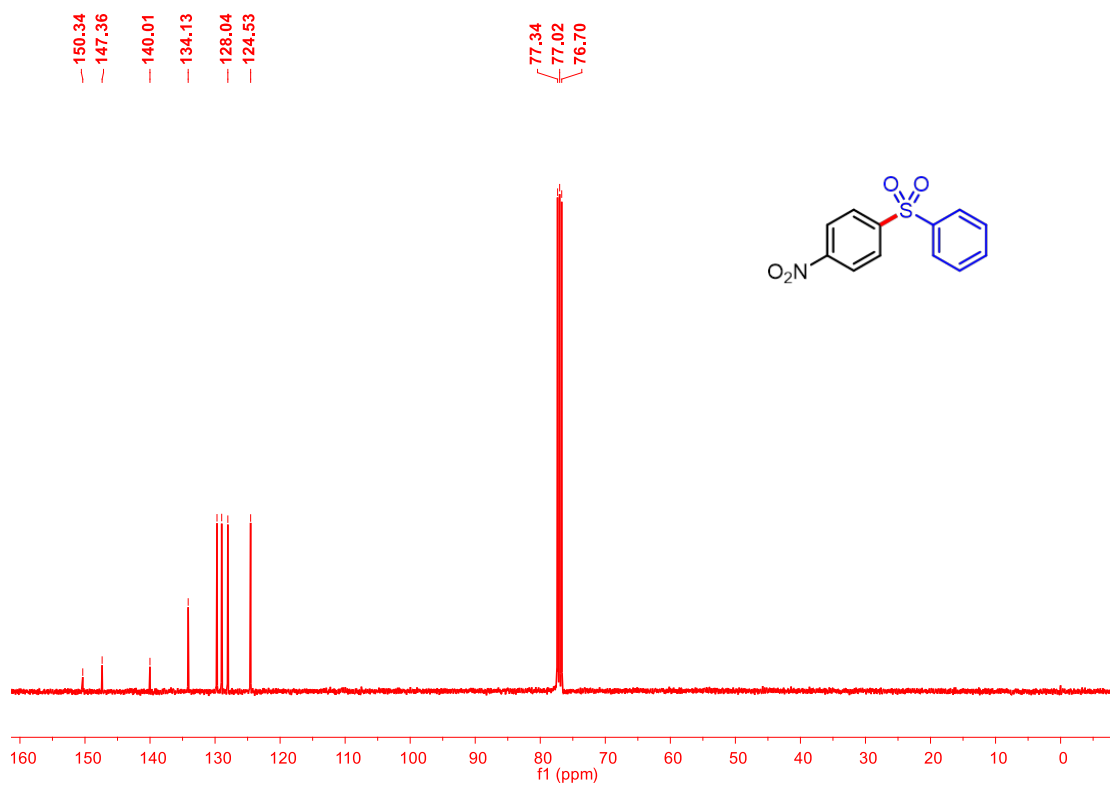

**Fig. S14** The  $^1\text{H}$  (400 MHz),  $^{13}\text{C}$  (101 MHz) NMR spectra for 4-(phenylsulfonyl)-1,1'-biphenyl (**3ha**) in  $\text{CDCl}_3$

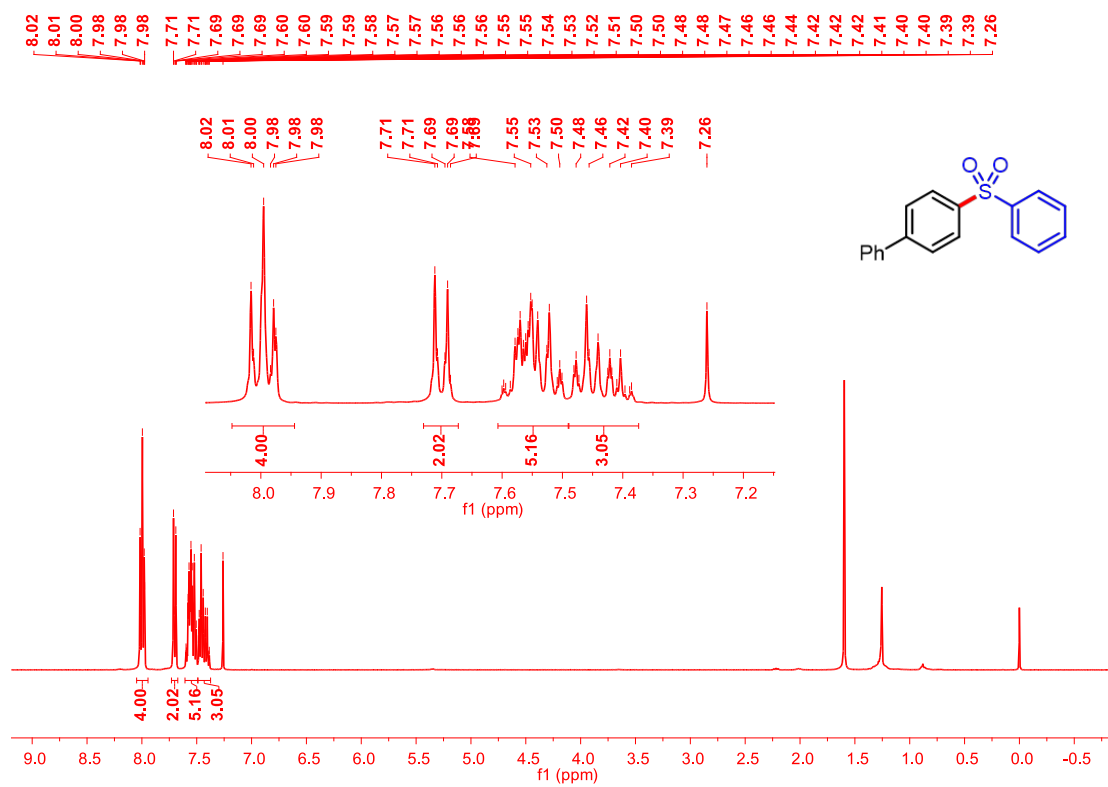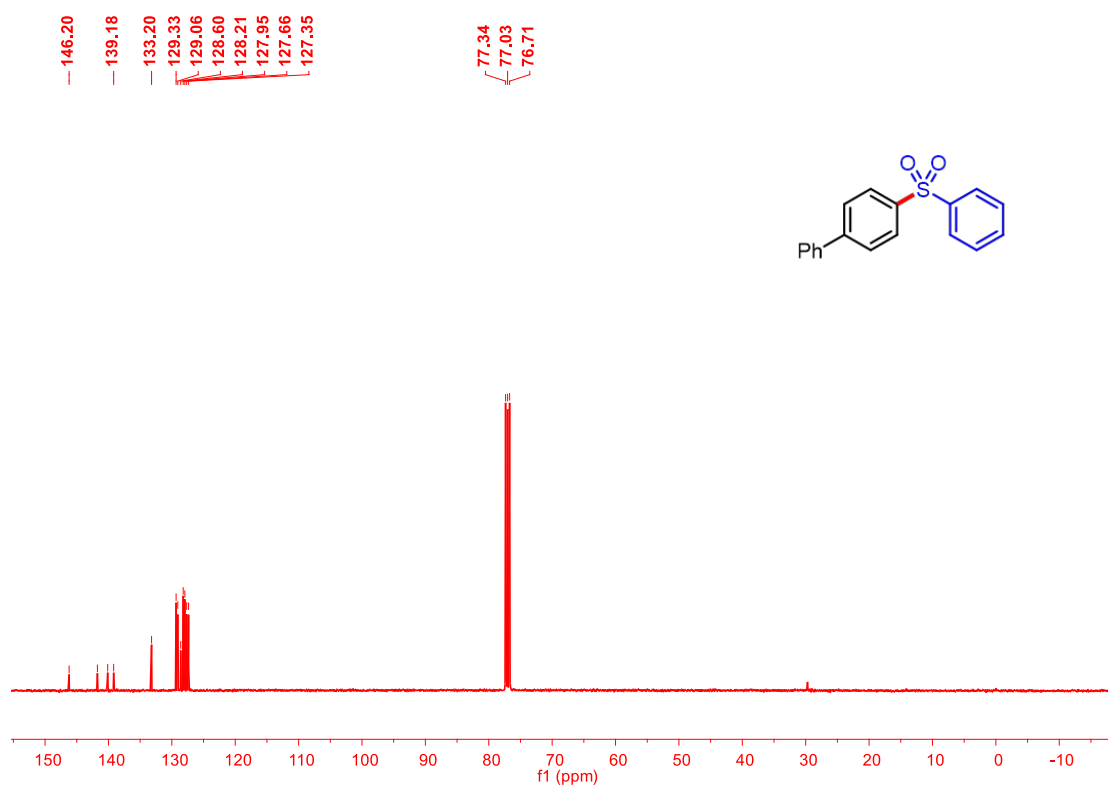

**Fig. S15** The  $^1\text{H}$  (400 MHz),  $^{13}\text{C}$  (101 MHz) NMR spectra for 1-(tert-butyl)-4-(phenylsulfonyl)benzene (**3ia**) in  $\text{CDCl}_3$

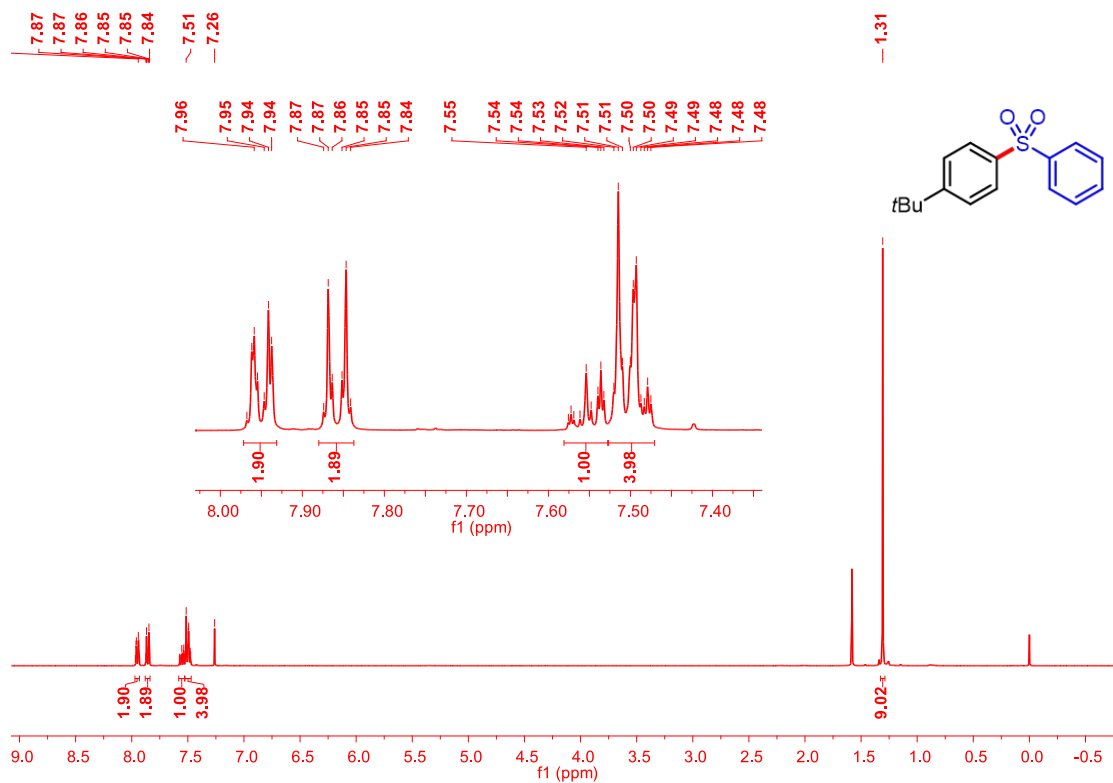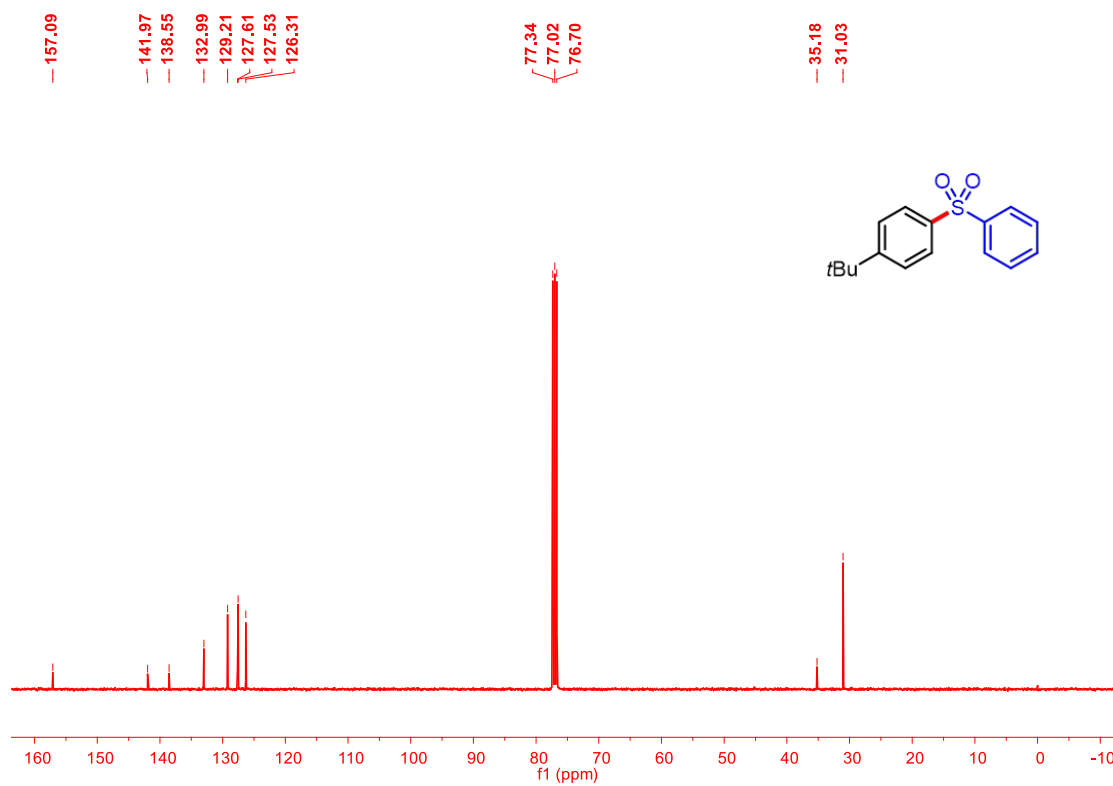

**Fig. S16** The  $^1\text{H}$  (400 MHz),  $^{13}\text{C}$  (101 MHz),  $^{19}\text{F}$  (377 MHz) NMR spectra for 1-fluoro-4-(phenylsulfonyl)benzene (**3ja**) in  $\text{CDCl}_3$

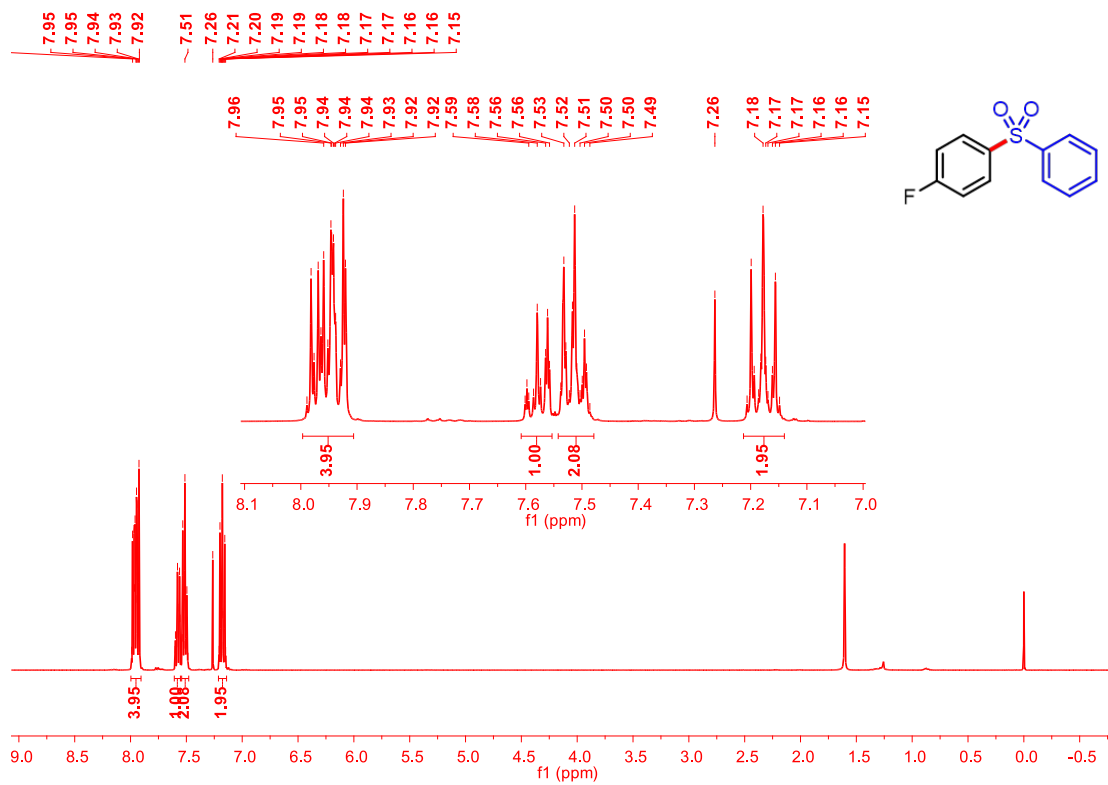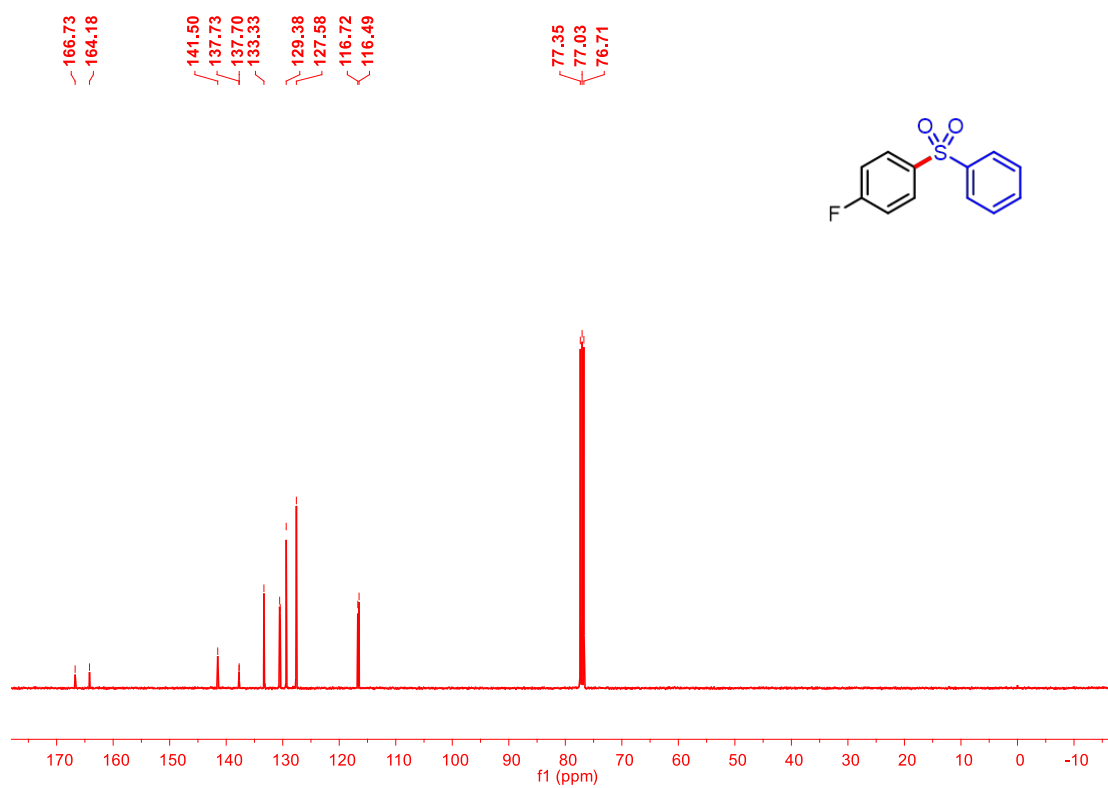

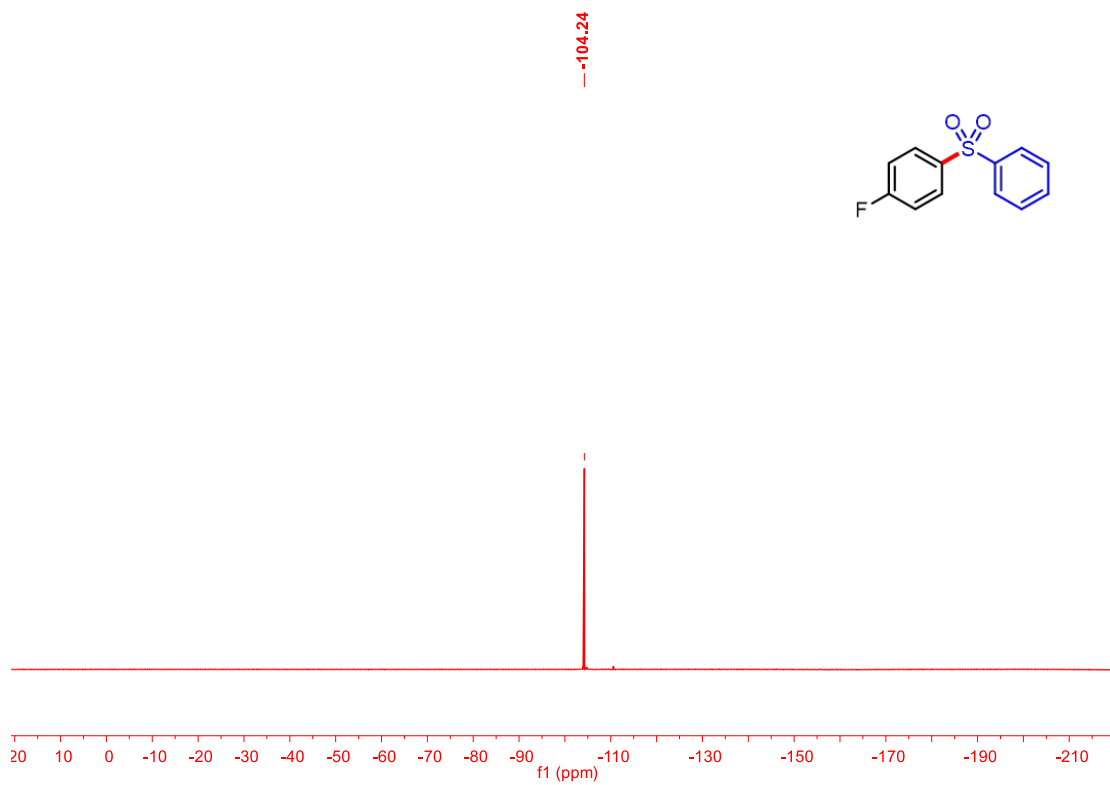



**Fig. S17** The  $^1\text{H}$  (400 MHz),  $^{13}\text{C}$  (101 MHz) NMR spectra for 1-methoxy-4-(phenylsulfonyl)benzene (**3ka**) in  $\text{CDCl}_3$

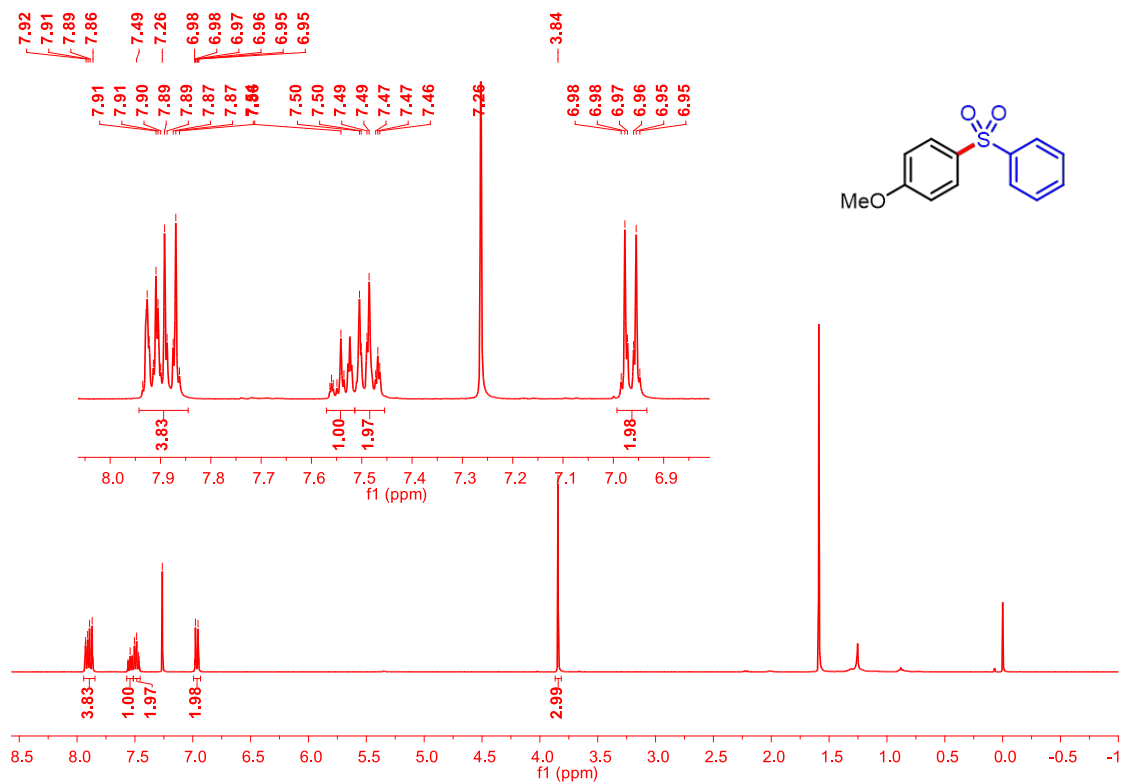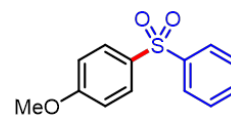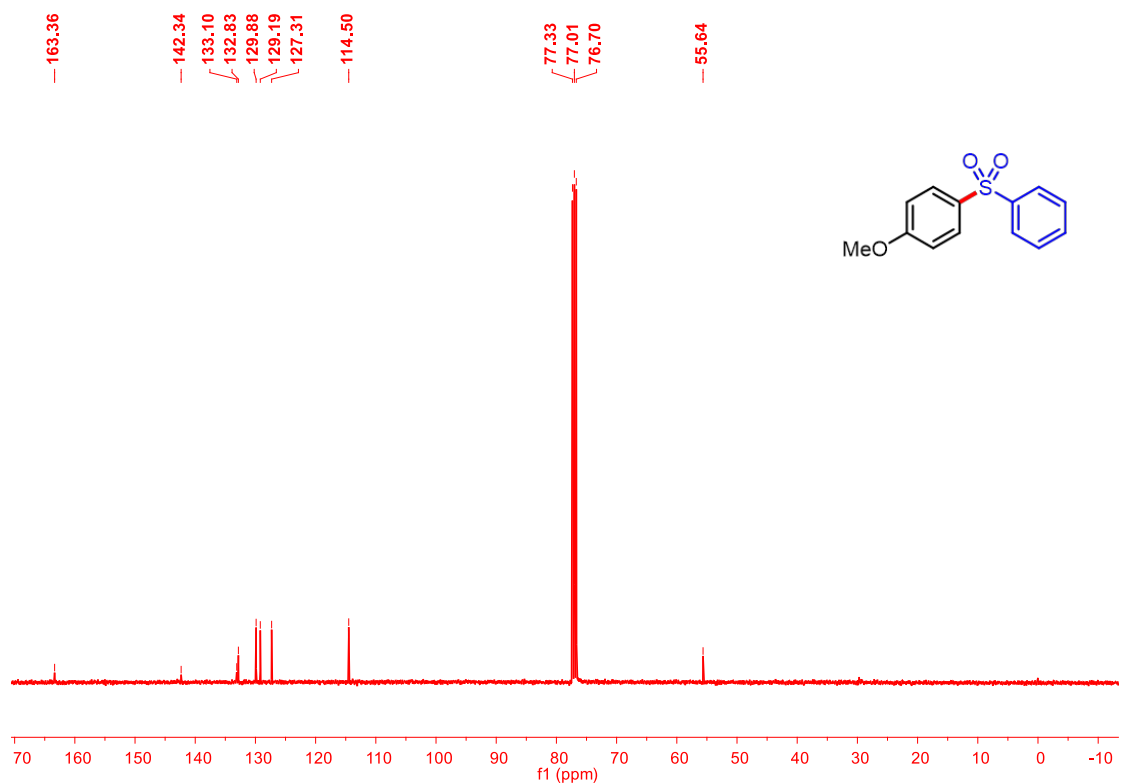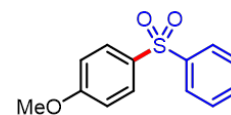

**Fig. S18** The  $^1\text{H}$  (400 MHz),  $^{13}\text{C}$  (101 MHz) NMR spectra for 3-(phenylsulfonyl)benzonitrile (**3la**) in  $\text{CDCl}_3$

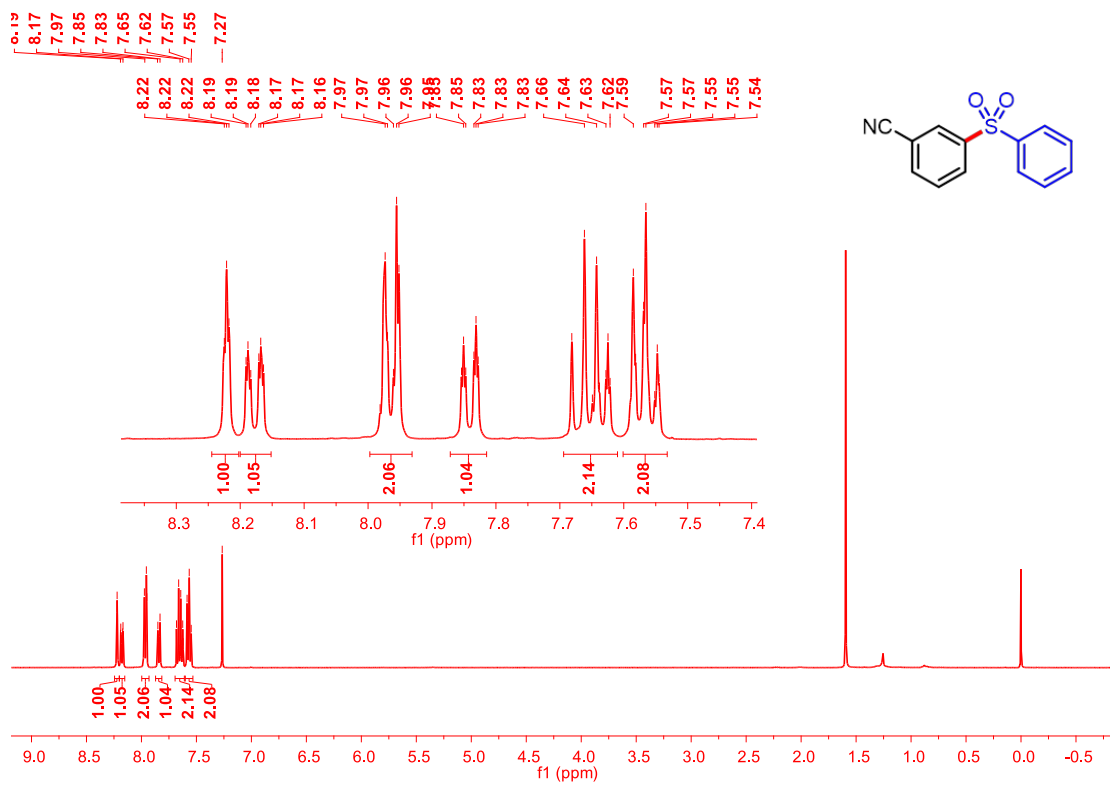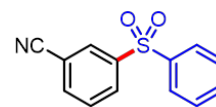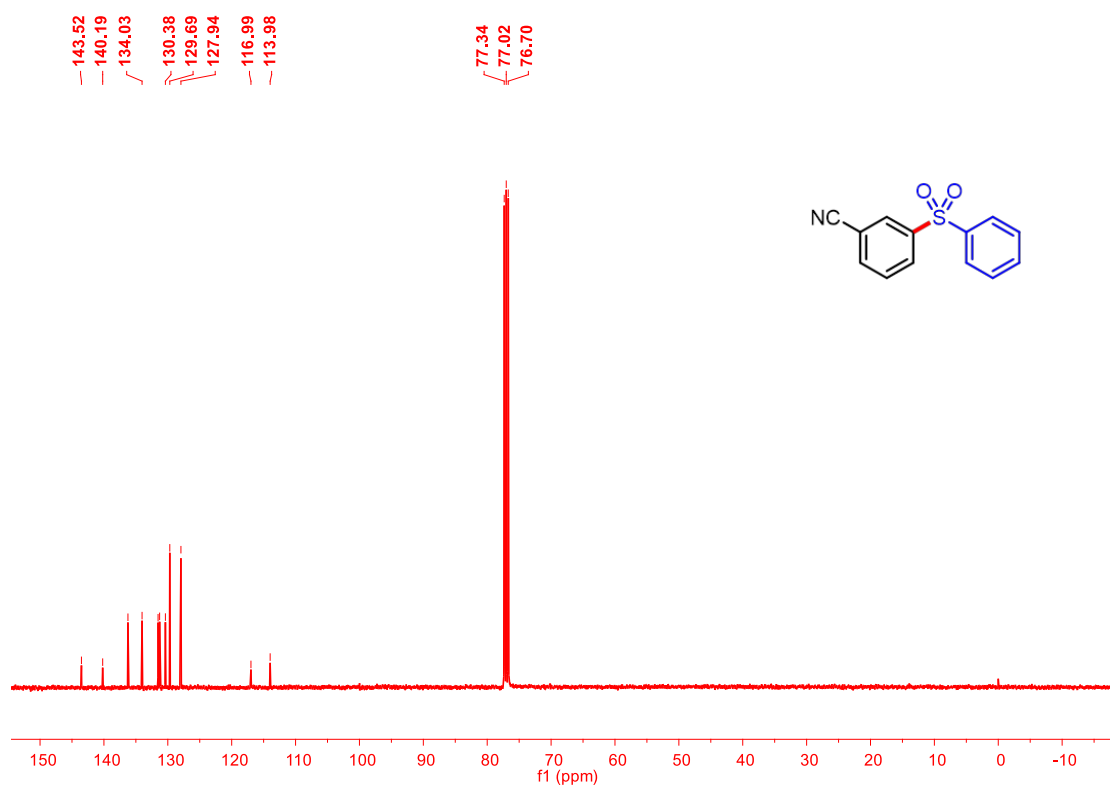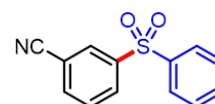

**Fig. S19** The  $^1\text{H}$  (400 MHz),  $^{13}\text{C}$  (101 MHz) NMR spectra for methyl 3-(phenylsulfonyl)benzoate (**3ma**) in  $\text{CDCl}_3$

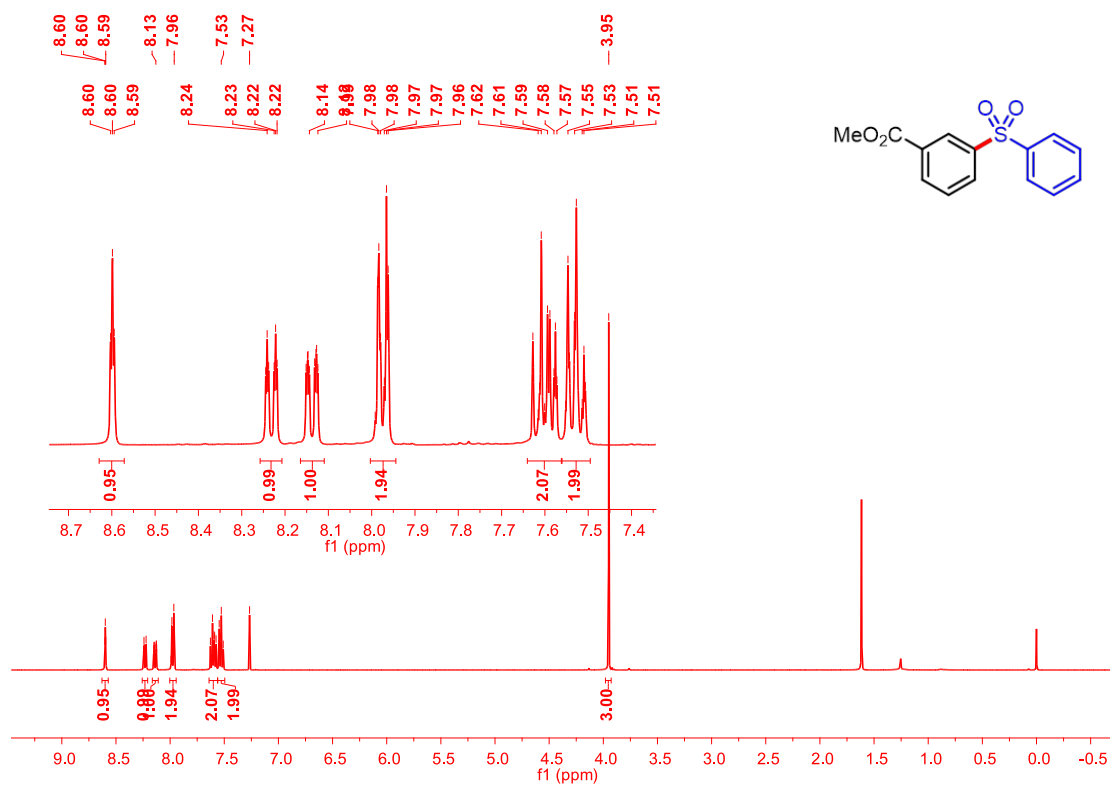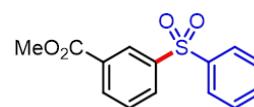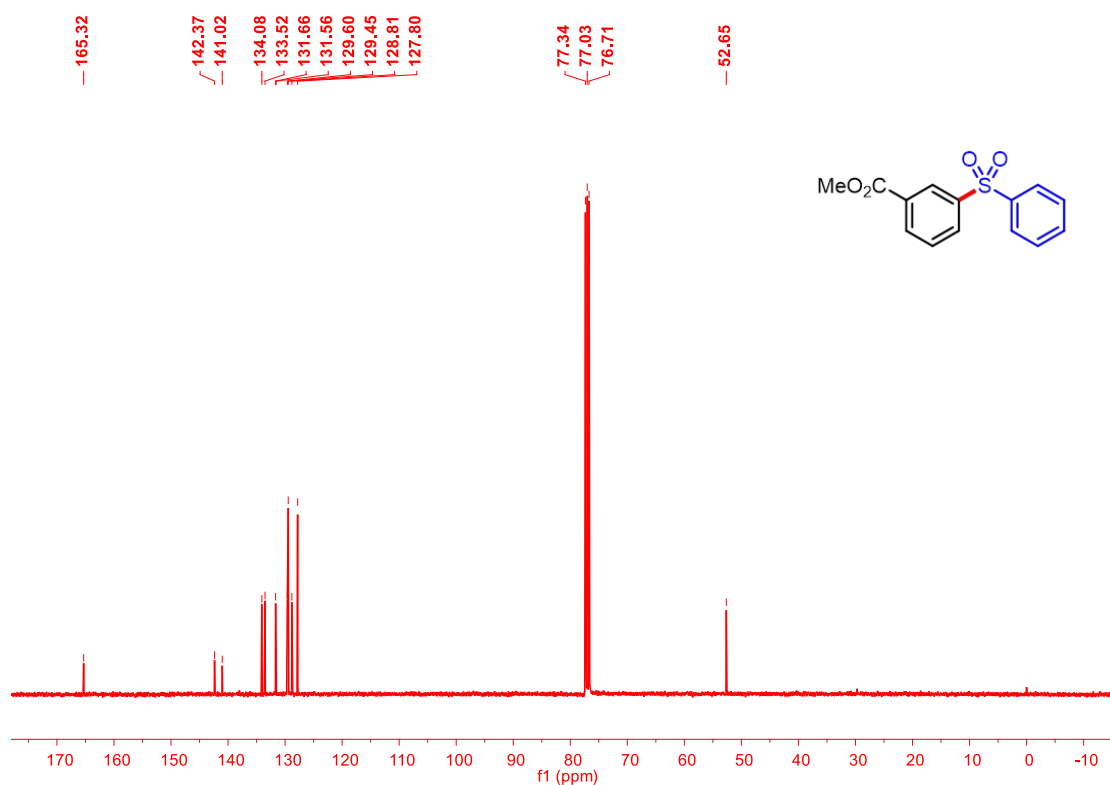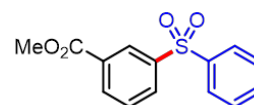

**Fig. S20** The  $^1\text{H}$  (400 MHz),  $^{13}\text{C}$  (101 MHz) NMR spectra for 2-(phenylsulfonyl)benzonitrile (**3na**) in  $\text{CDCl}_3$

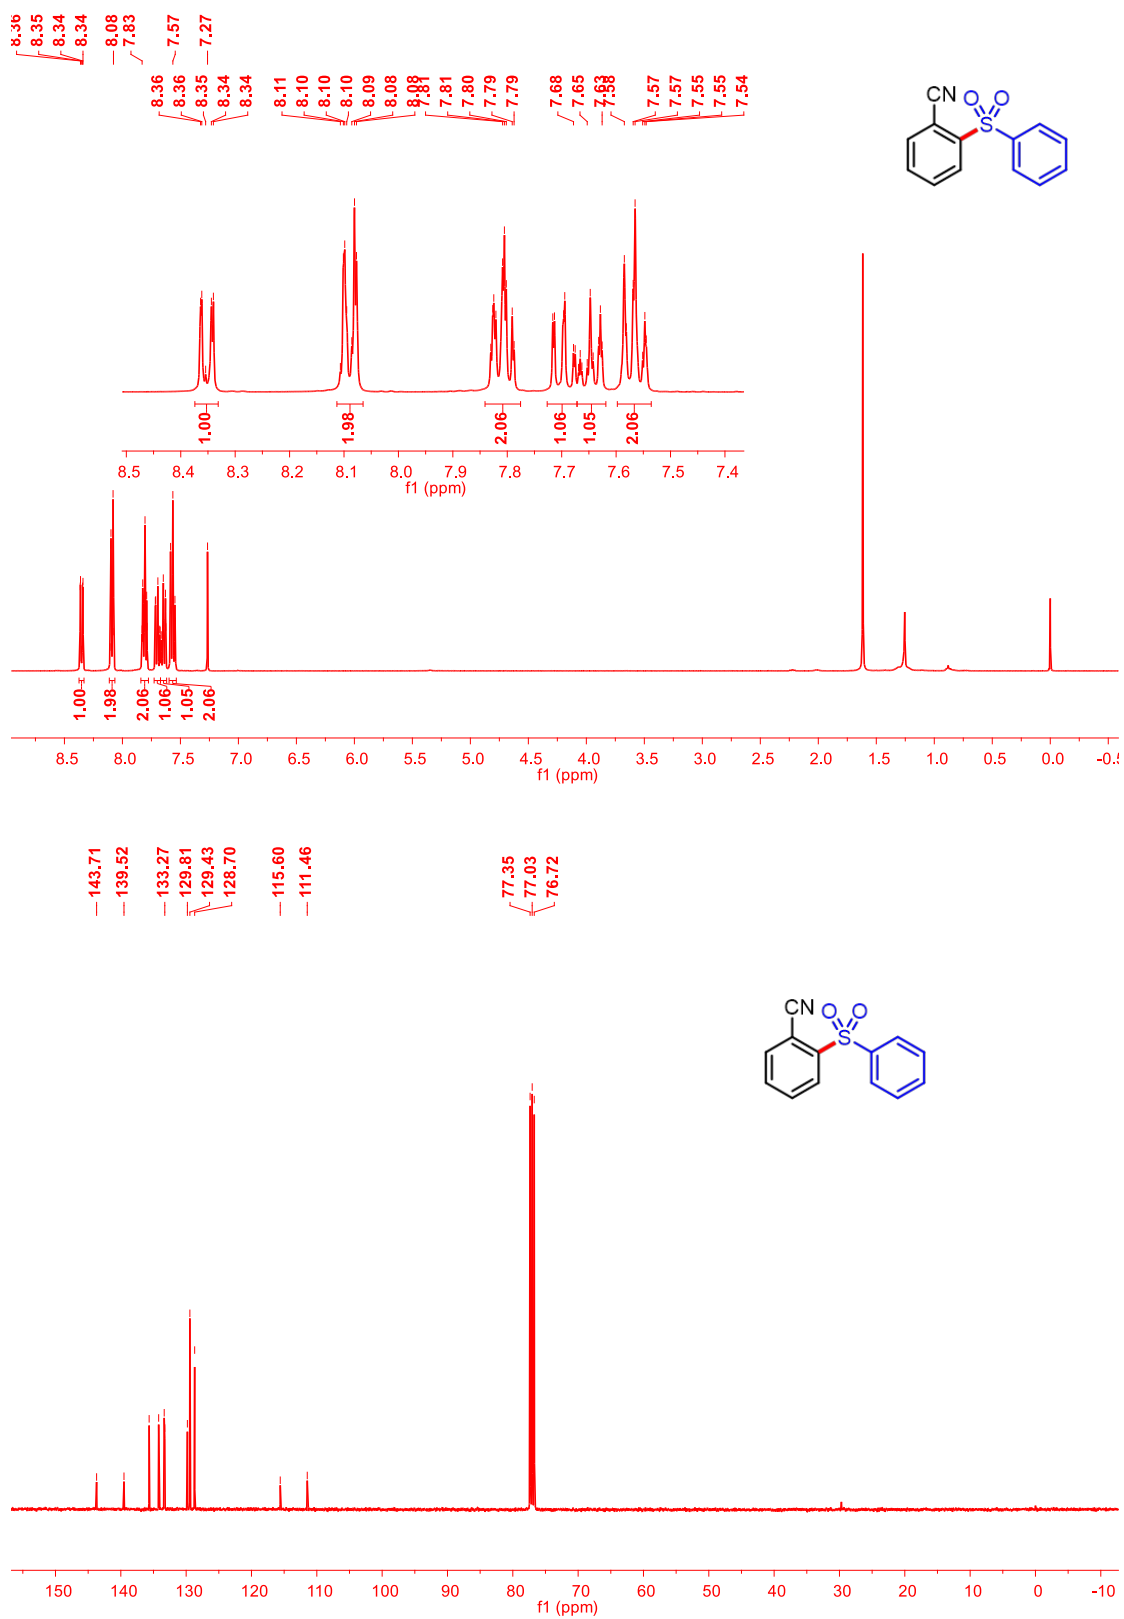

**Fig. S21** The  $^1\text{H}$  (400 MHz),  $^{13}\text{C}$  (101 MHz) NMR spectra for 1-(2-(phenylsulfonyl)phenyl)ethan-1-one (**30a**) in  $\text{CDCl}_3$

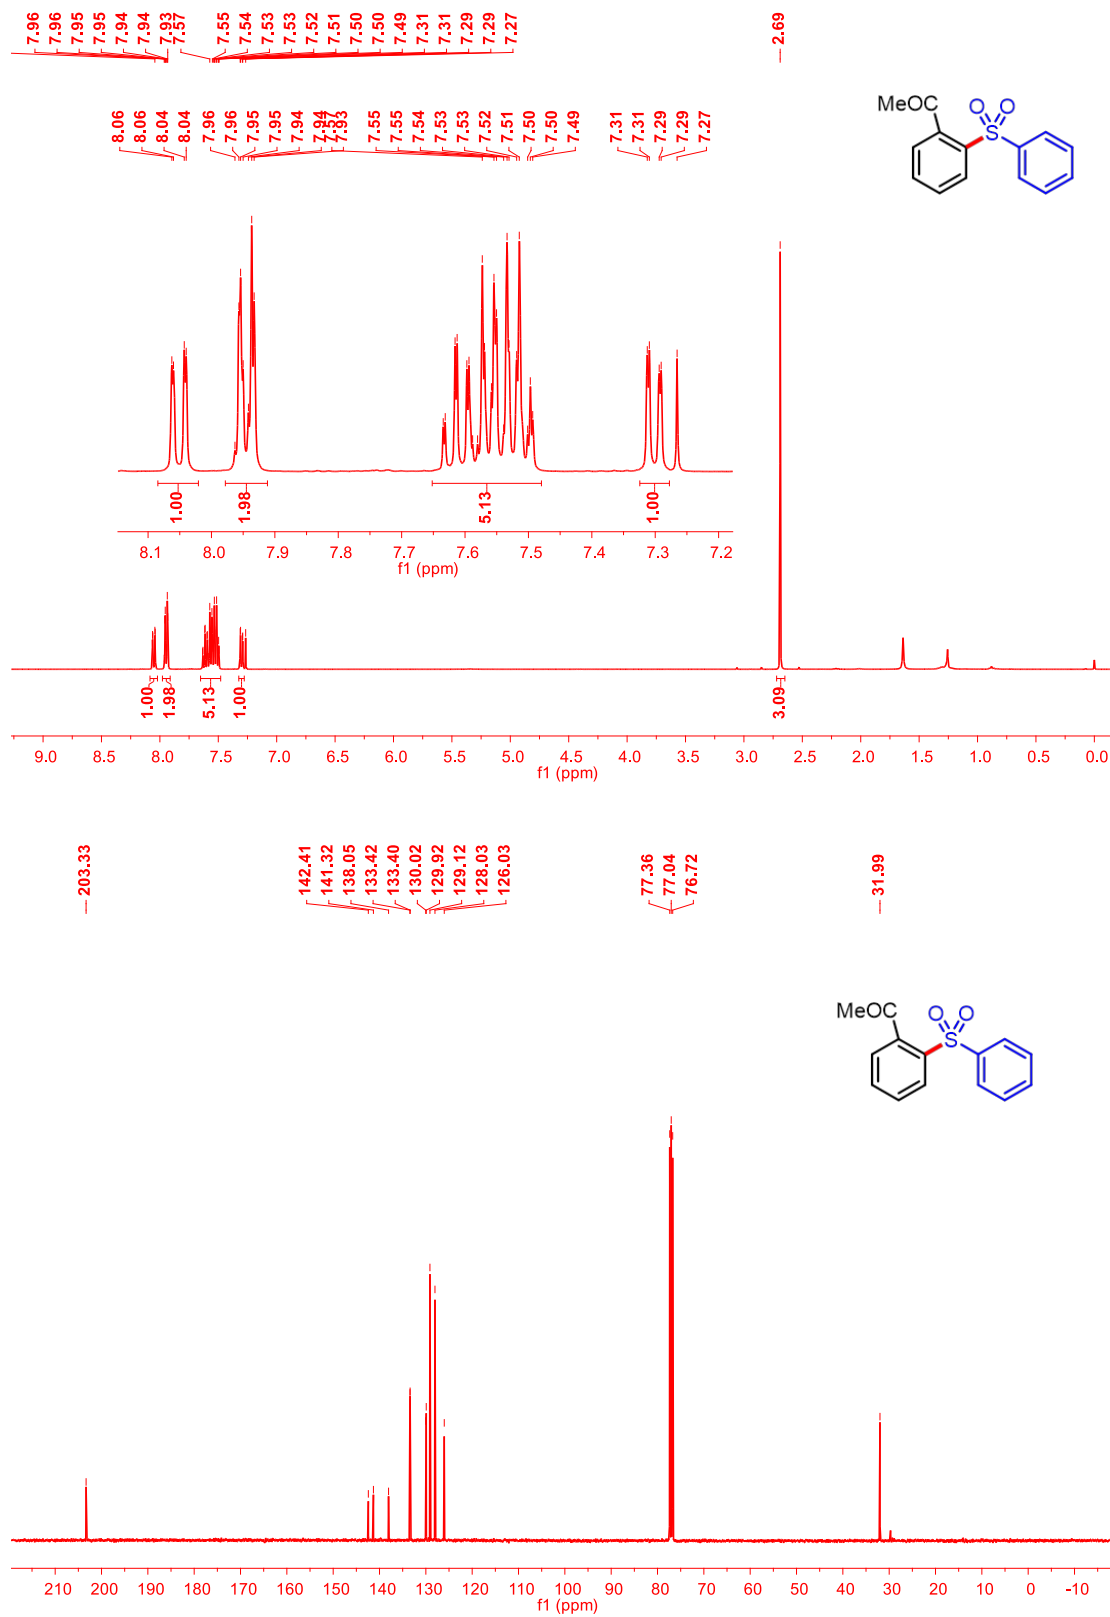

**Fig. S22** The  $^1\text{H}$  (400 MHz),  $^{13}\text{C}$  (101 MHz) NMR spectra for phenyl(2-(phenylsulfonyl)phenyl)methanone (**3pa**) in  $\text{CDCl}_3$

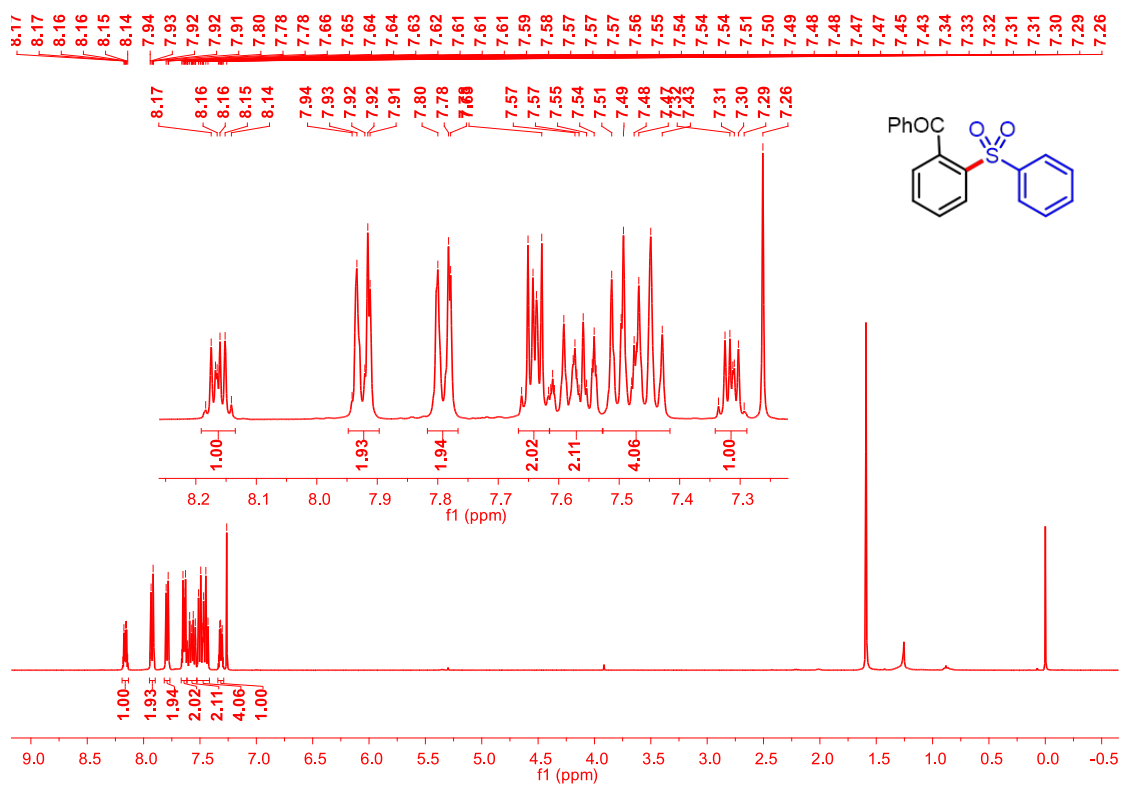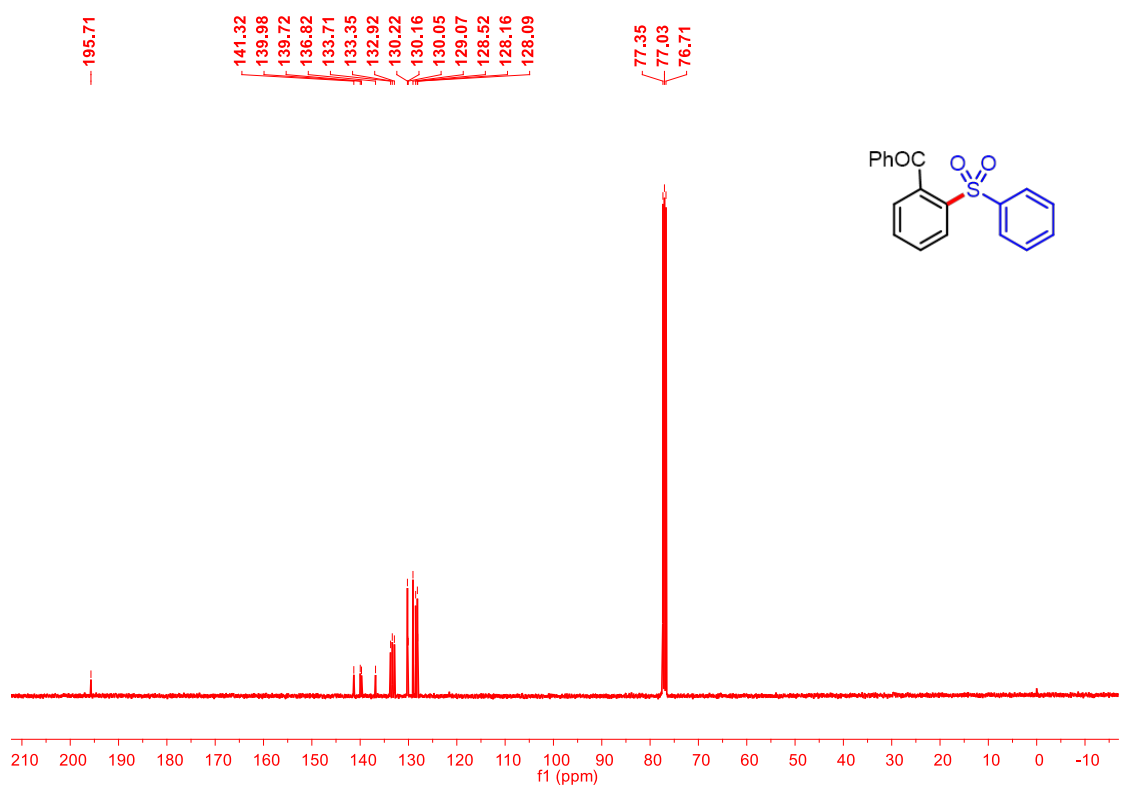

**Fig. S23** The  $^1\text{H}$  (400 MHz),  $^{13}\text{C}$  (101 MHz) NMR spectra for methyl 2-(phenylsulfonyl)benzoate (**3qa**) in  $\text{CDCl}_3$

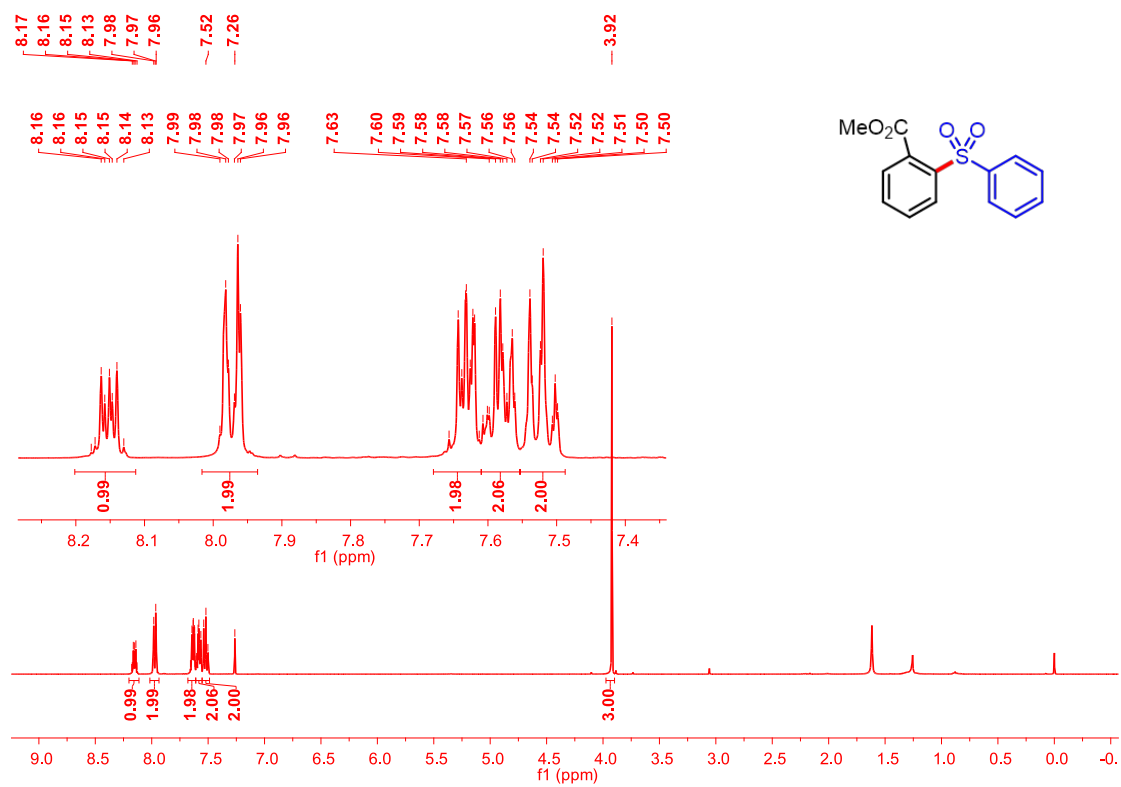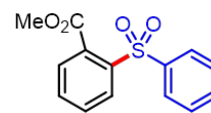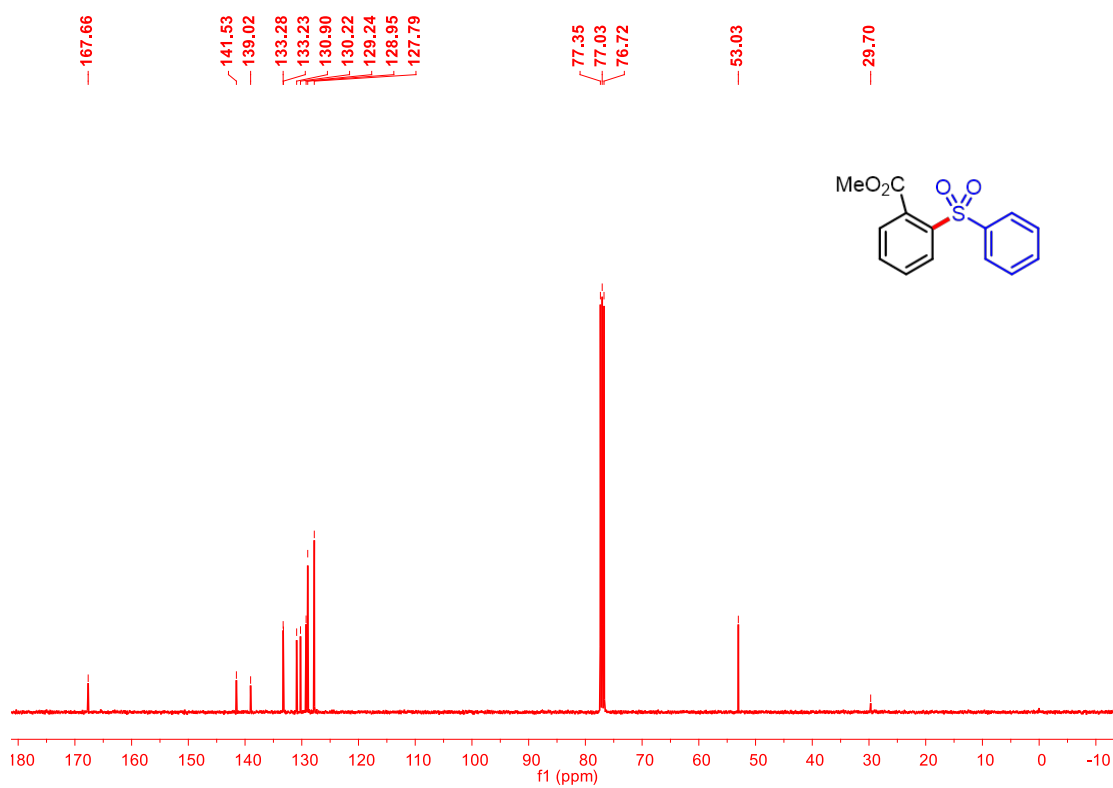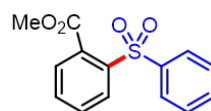

**Fig. S24** The  $^1\text{H}$  (400 MHz),  $^{13}\text{C}$  (101 MHz),  $^{19}\text{F}$  (377 MHz) NMR spectra for 4-(phenylsulfonyl)-2-(trifluoromethyl)benzonitrile (**3ra**) in  $\text{CDCl}_3$

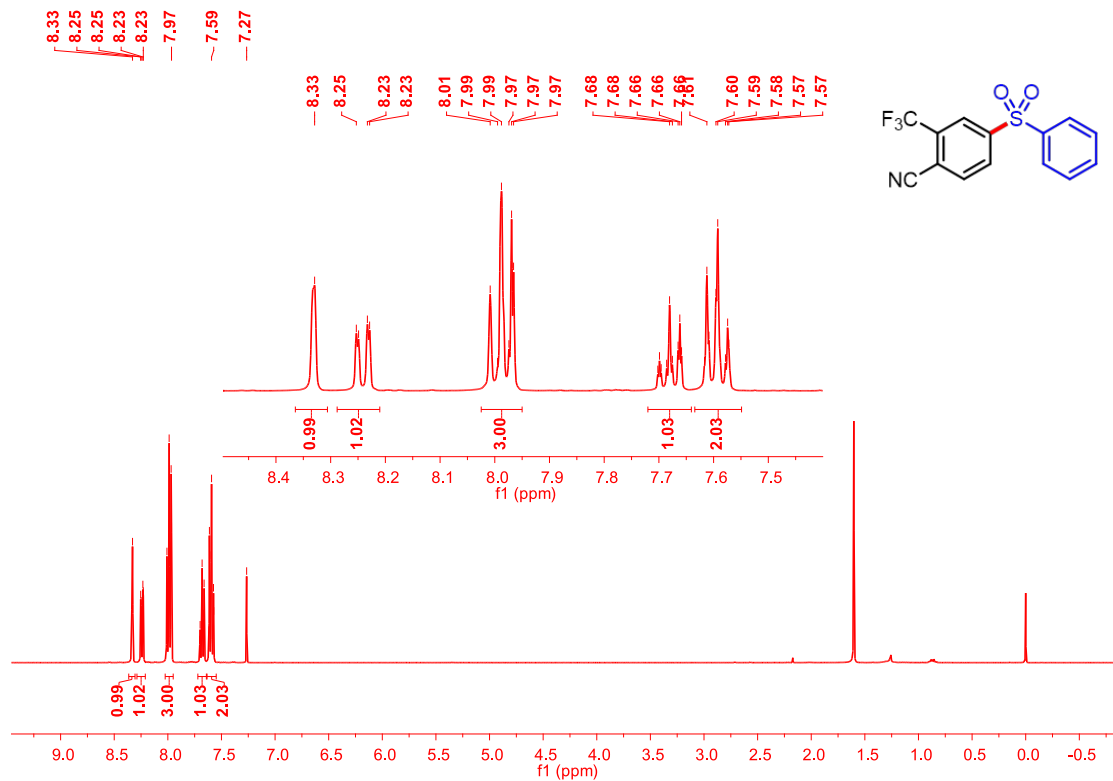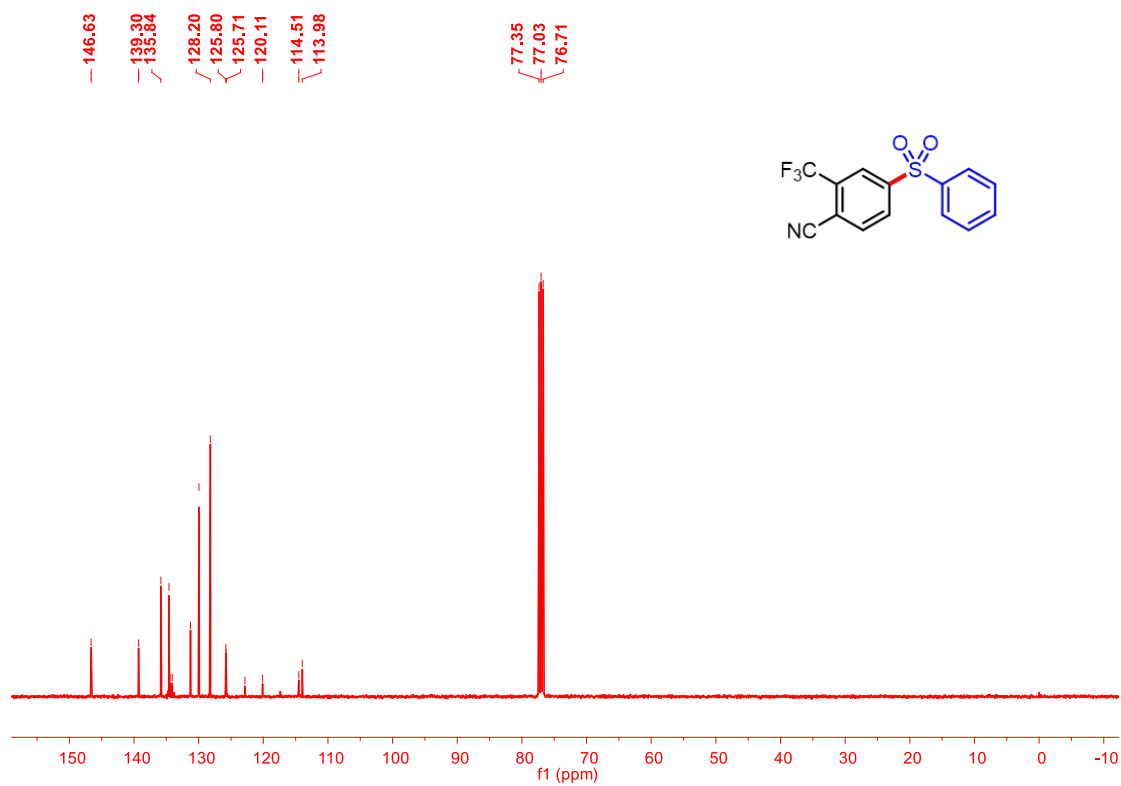



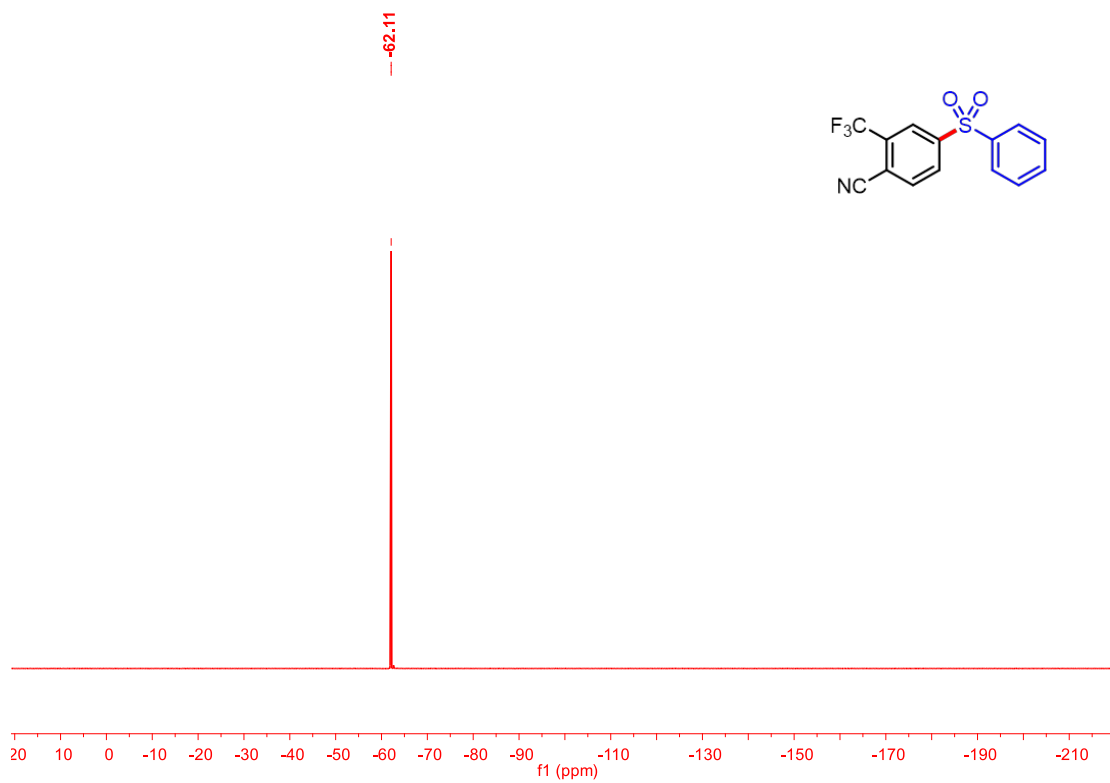

**Fig. S25** The  $^1\text{H}$  (400 MHz),  $^{13}\text{C}$  (101 MHz),  $^{19}\text{F}$  (377 MHz) NMR spectra for 3-(phenylsulfonyl)-5-(trifluoromethyl)benzonitrile (**3sa**) in  $\text{CDCl}_3$

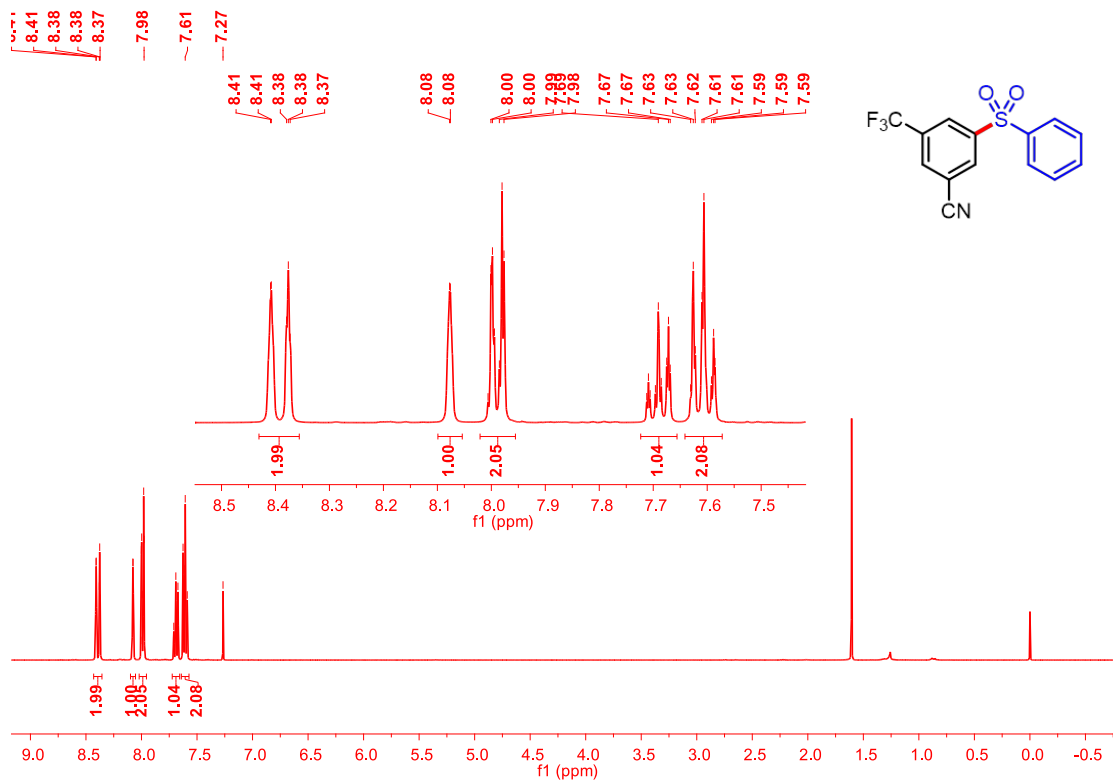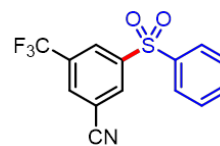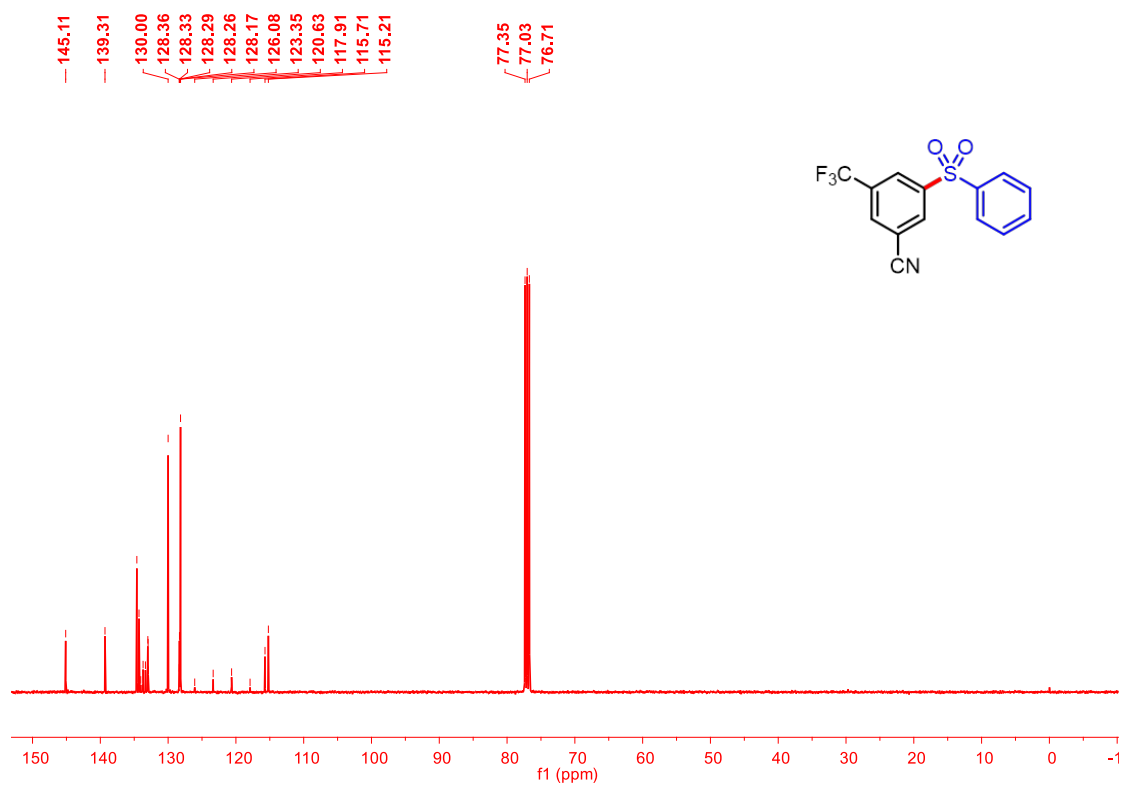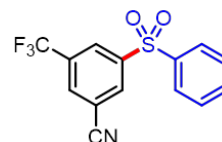

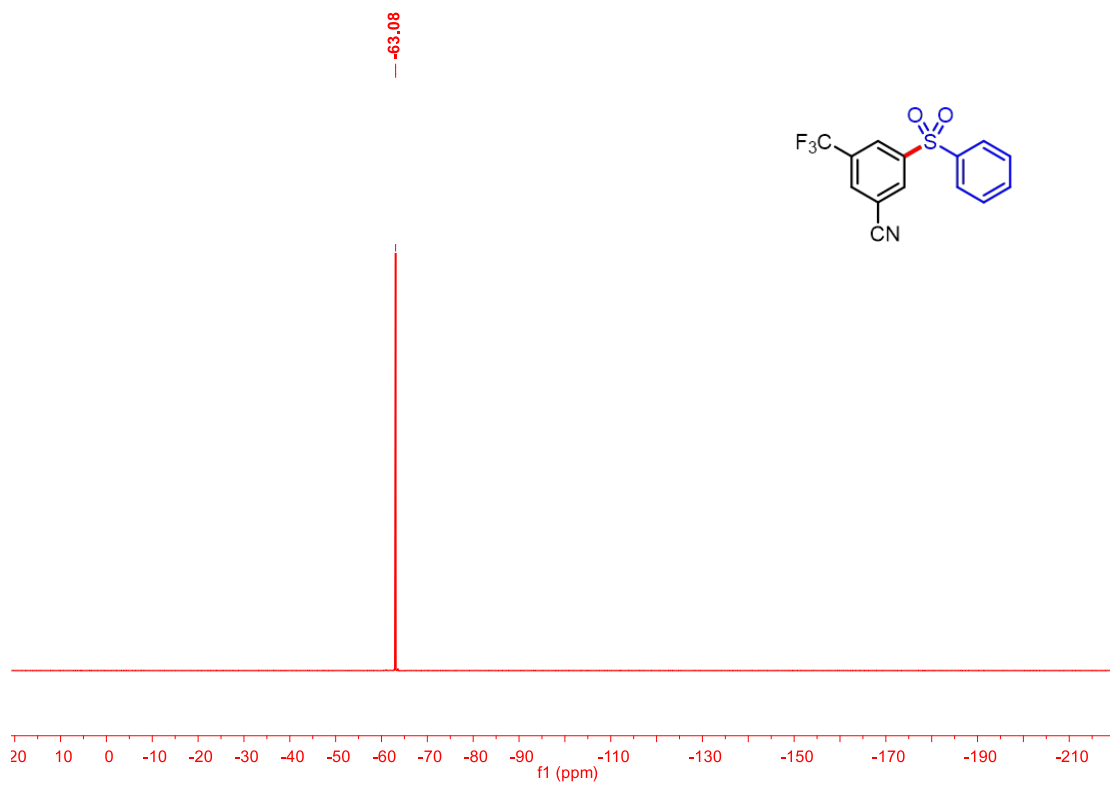

**Fig. S26** The  $^1\text{H}$  (400 MHz),  $^{13}\text{C}$  (101 MHz) NMR spectra for 5-(phenylsulfonyl)benzo[d][1,3]dioxole (**3ta**) in  $\text{CDCl}_3$

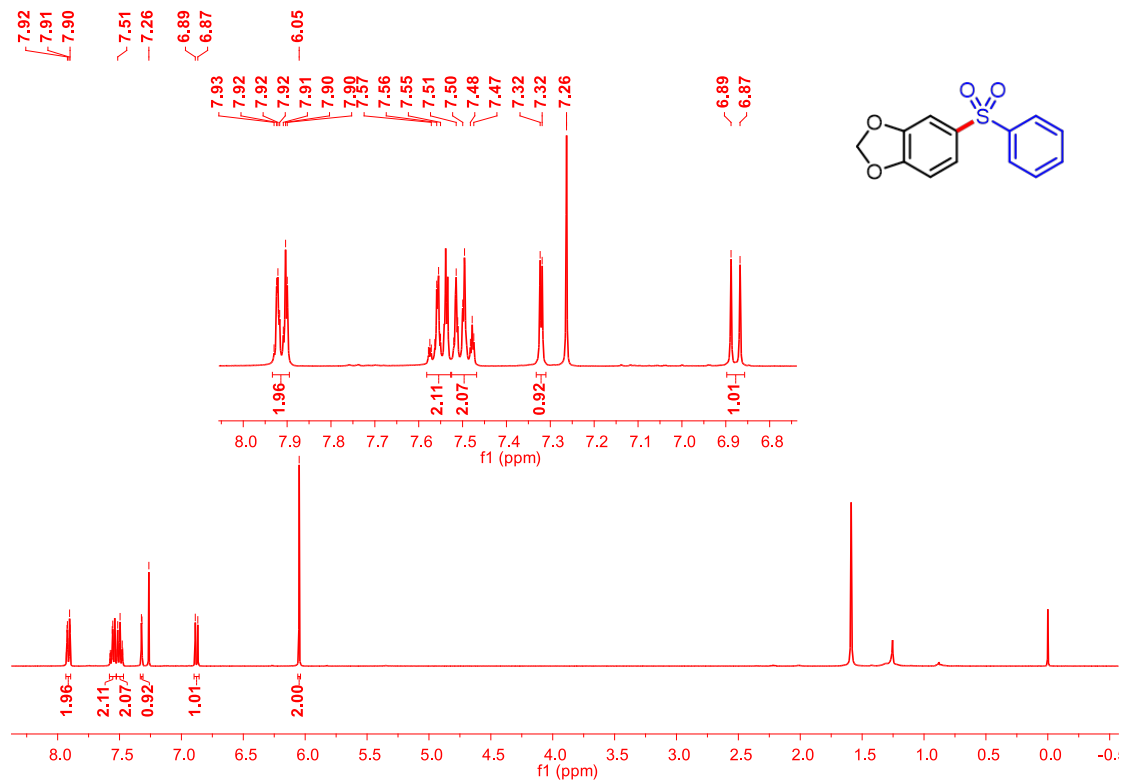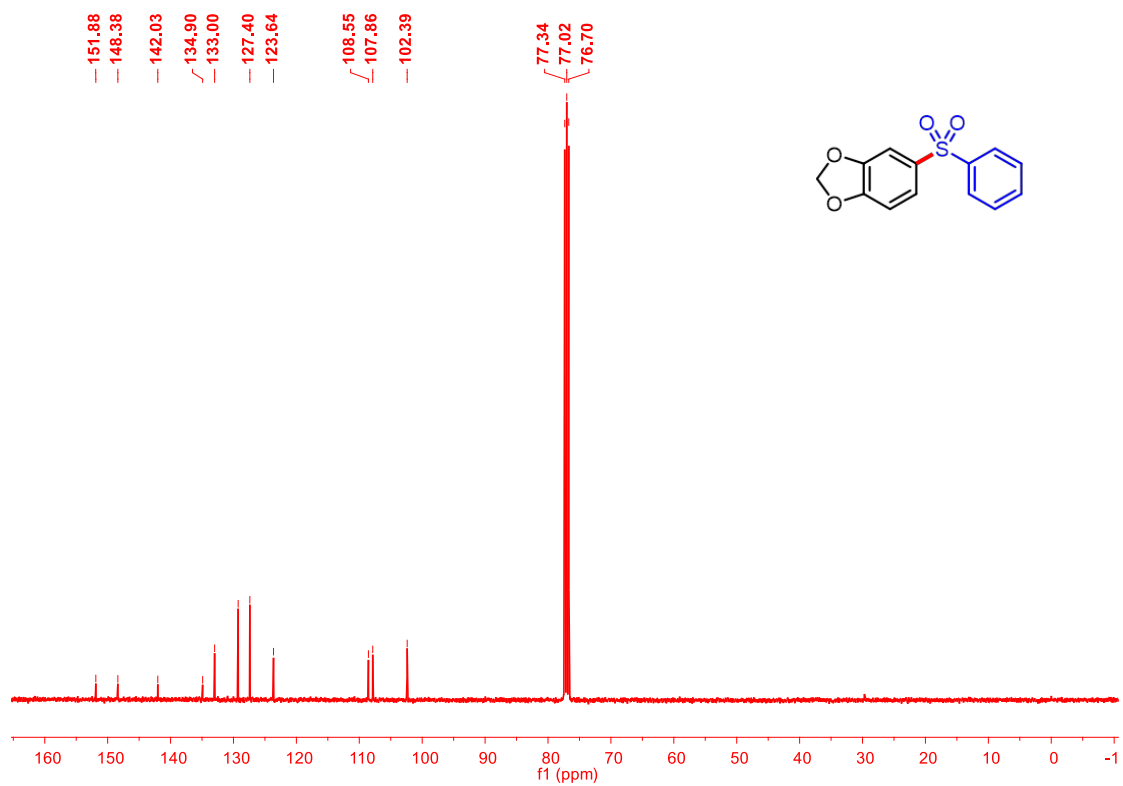

**Fig. S27** The  $^1\text{H}$  (400 MHz),  $^{13}\text{C}$  (101 MHz) NMR spectra for 2-(phenylsulfonyl)naphthalene (**3ua**) in  $\text{CDCl}_3$

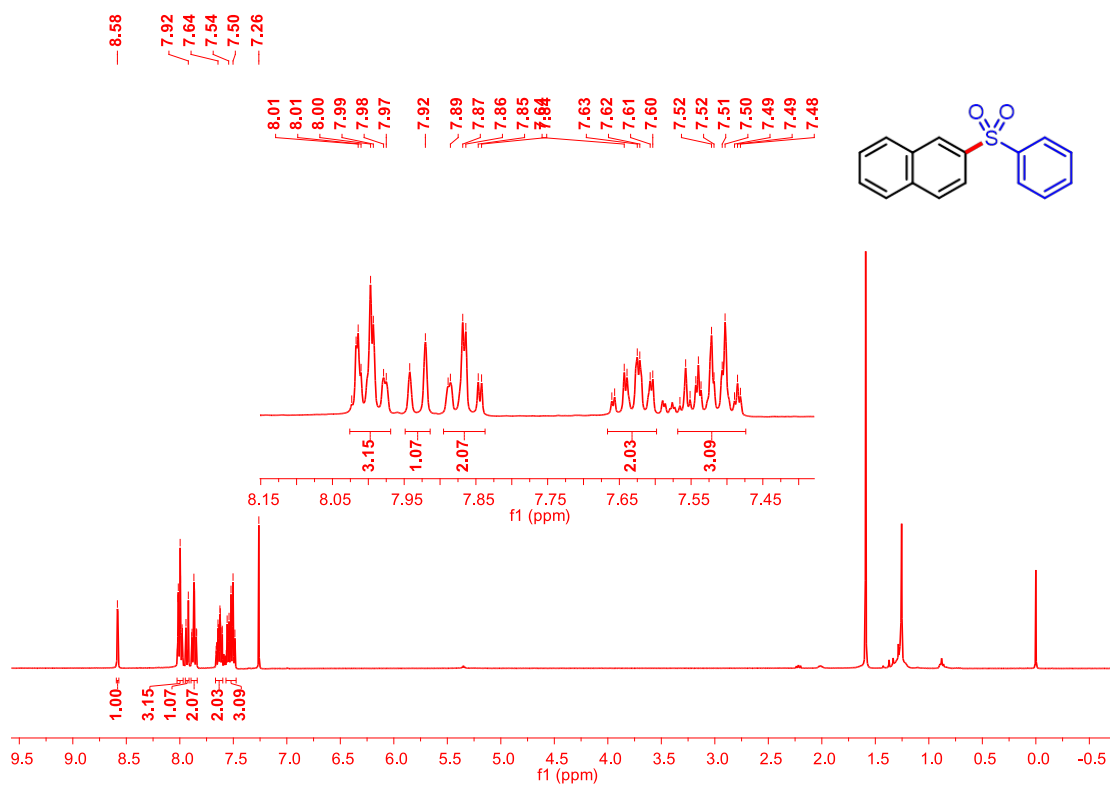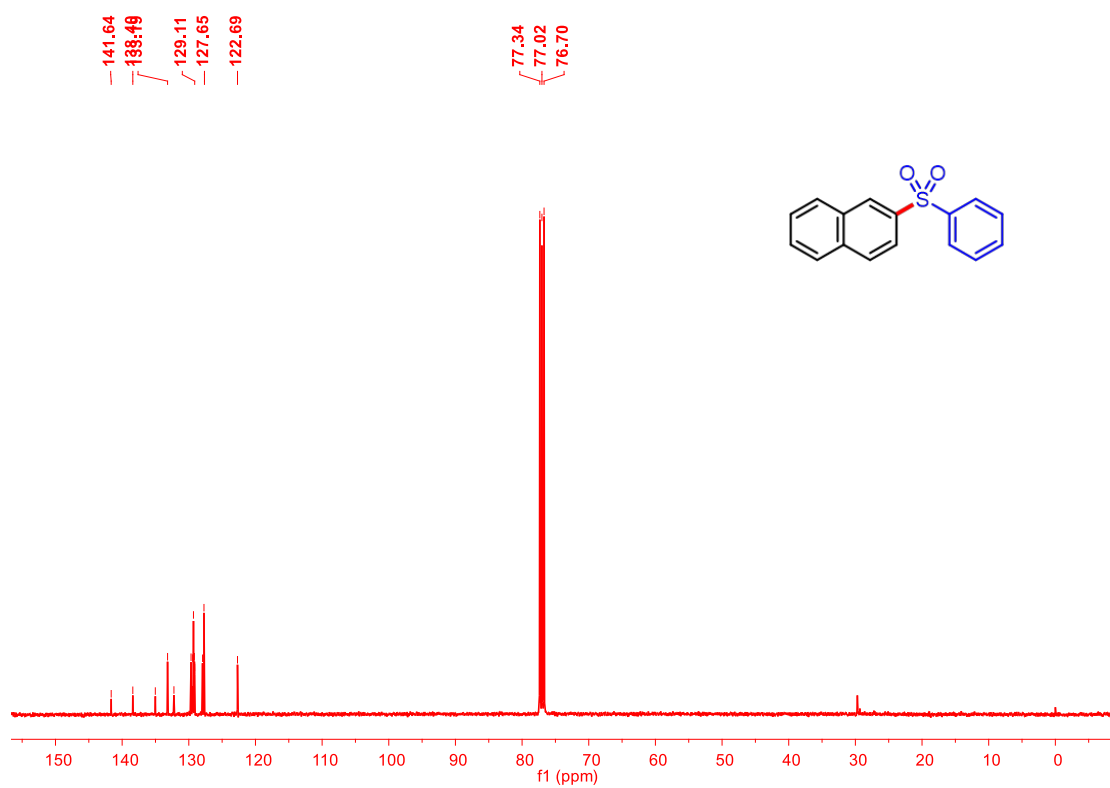

**Fig. S28** The  $^1\text{H}$  (400 MHz),  $^{13}\text{C}$  (101 MHz) NMR spectra for 2-(phenylsulfonyl)pyridine (**3va**) in  $\text{CDCl}_3$

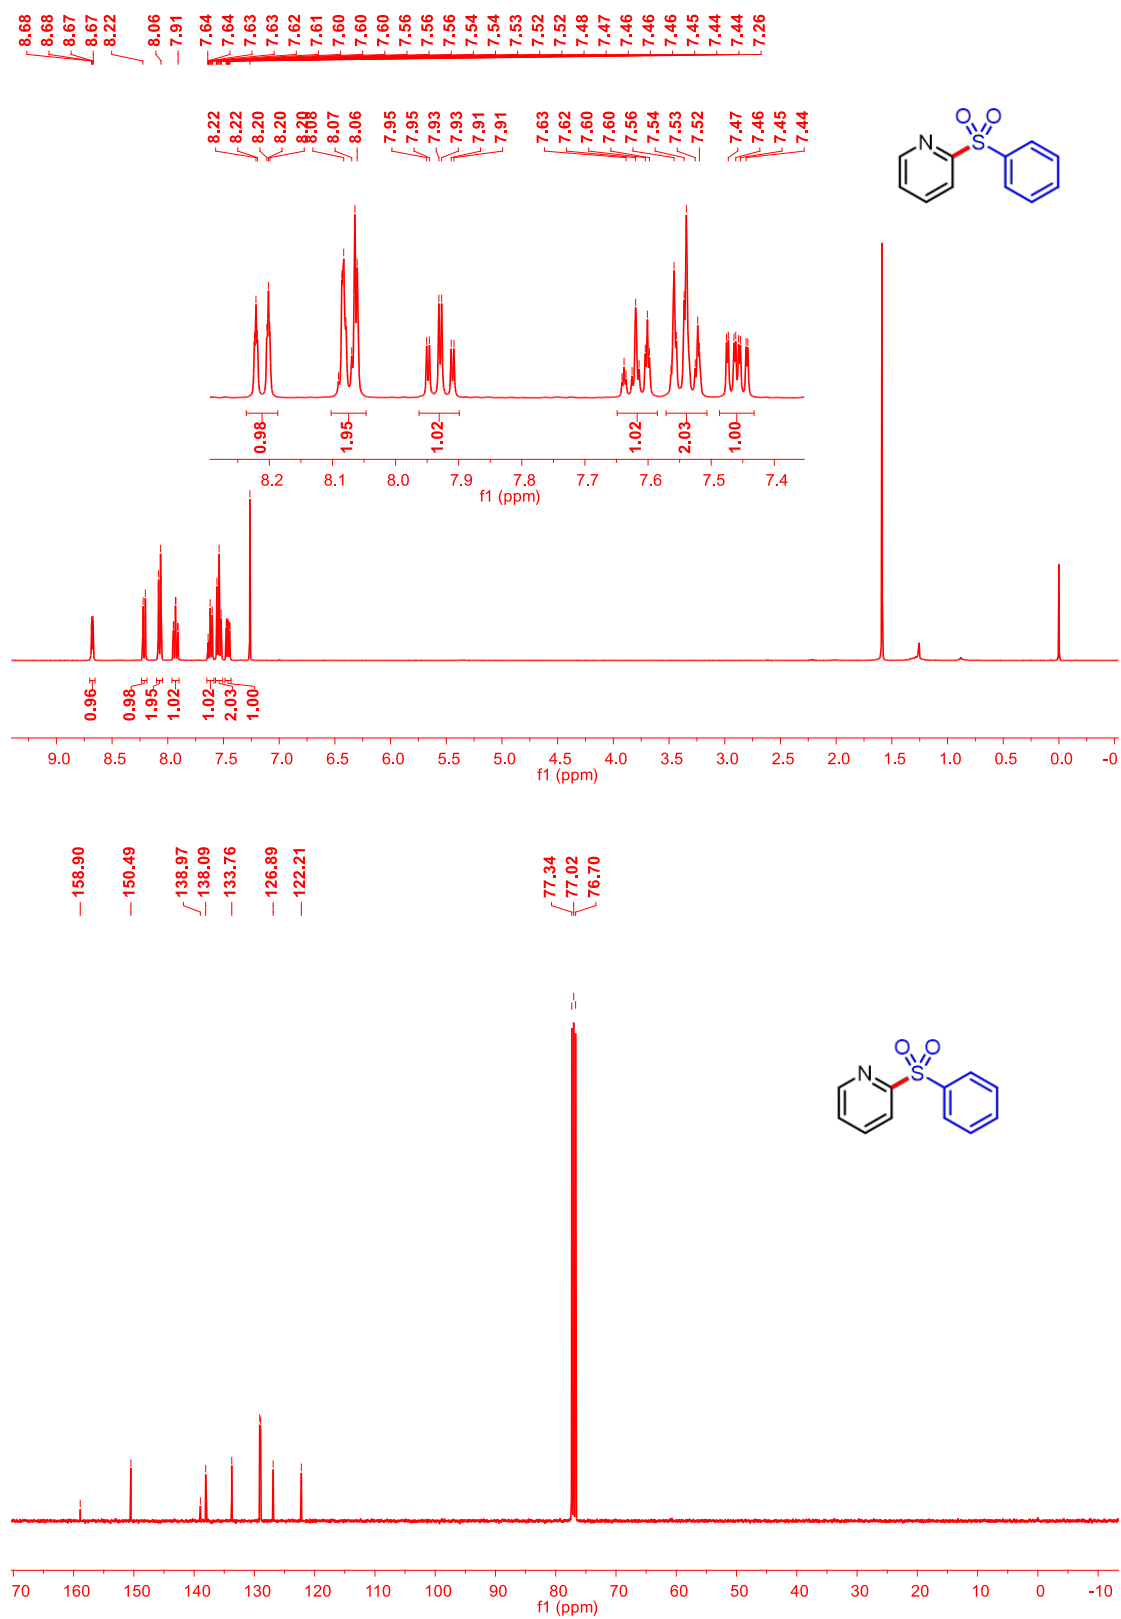

**Fig. S29** The  $^1\text{H}$  (400 MHz),  $^{13}\text{C}$  (101 MHz) NMR spectra for 6-(phenylsulfonyl)picolinonitrile (**3wa**) in  $\text{CDCl}_3$

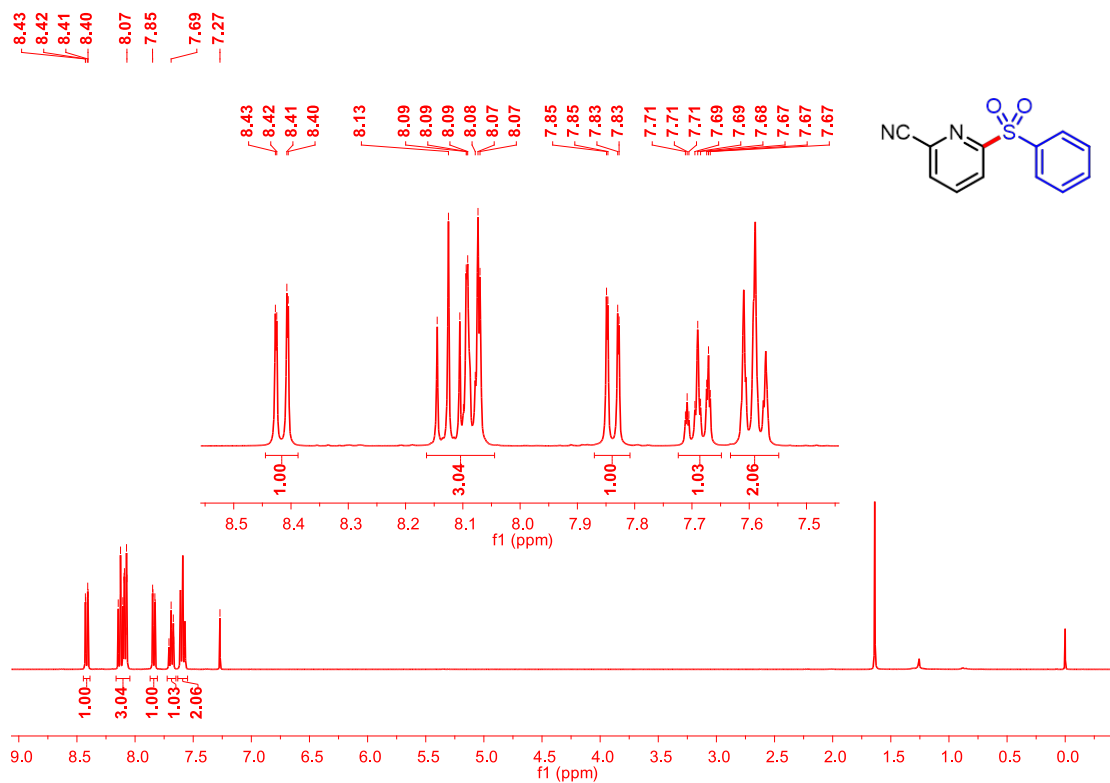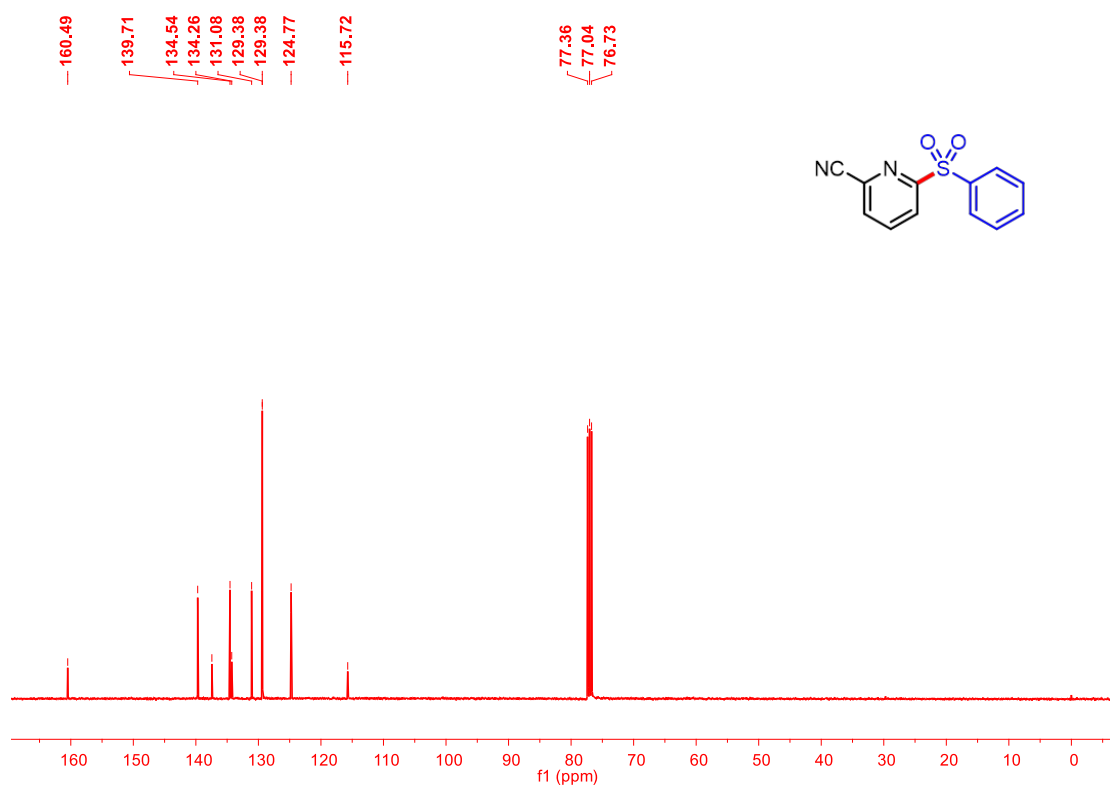

**Fig. S30** The  $^1\text{H}$  (400 MHz),  $^{13}\text{C}$  (101 MHz) NMR spectra for 2-phenyl-6-(phenylsulfonyl)pyridine (**3xa**) in  $\text{CDCl}_3$

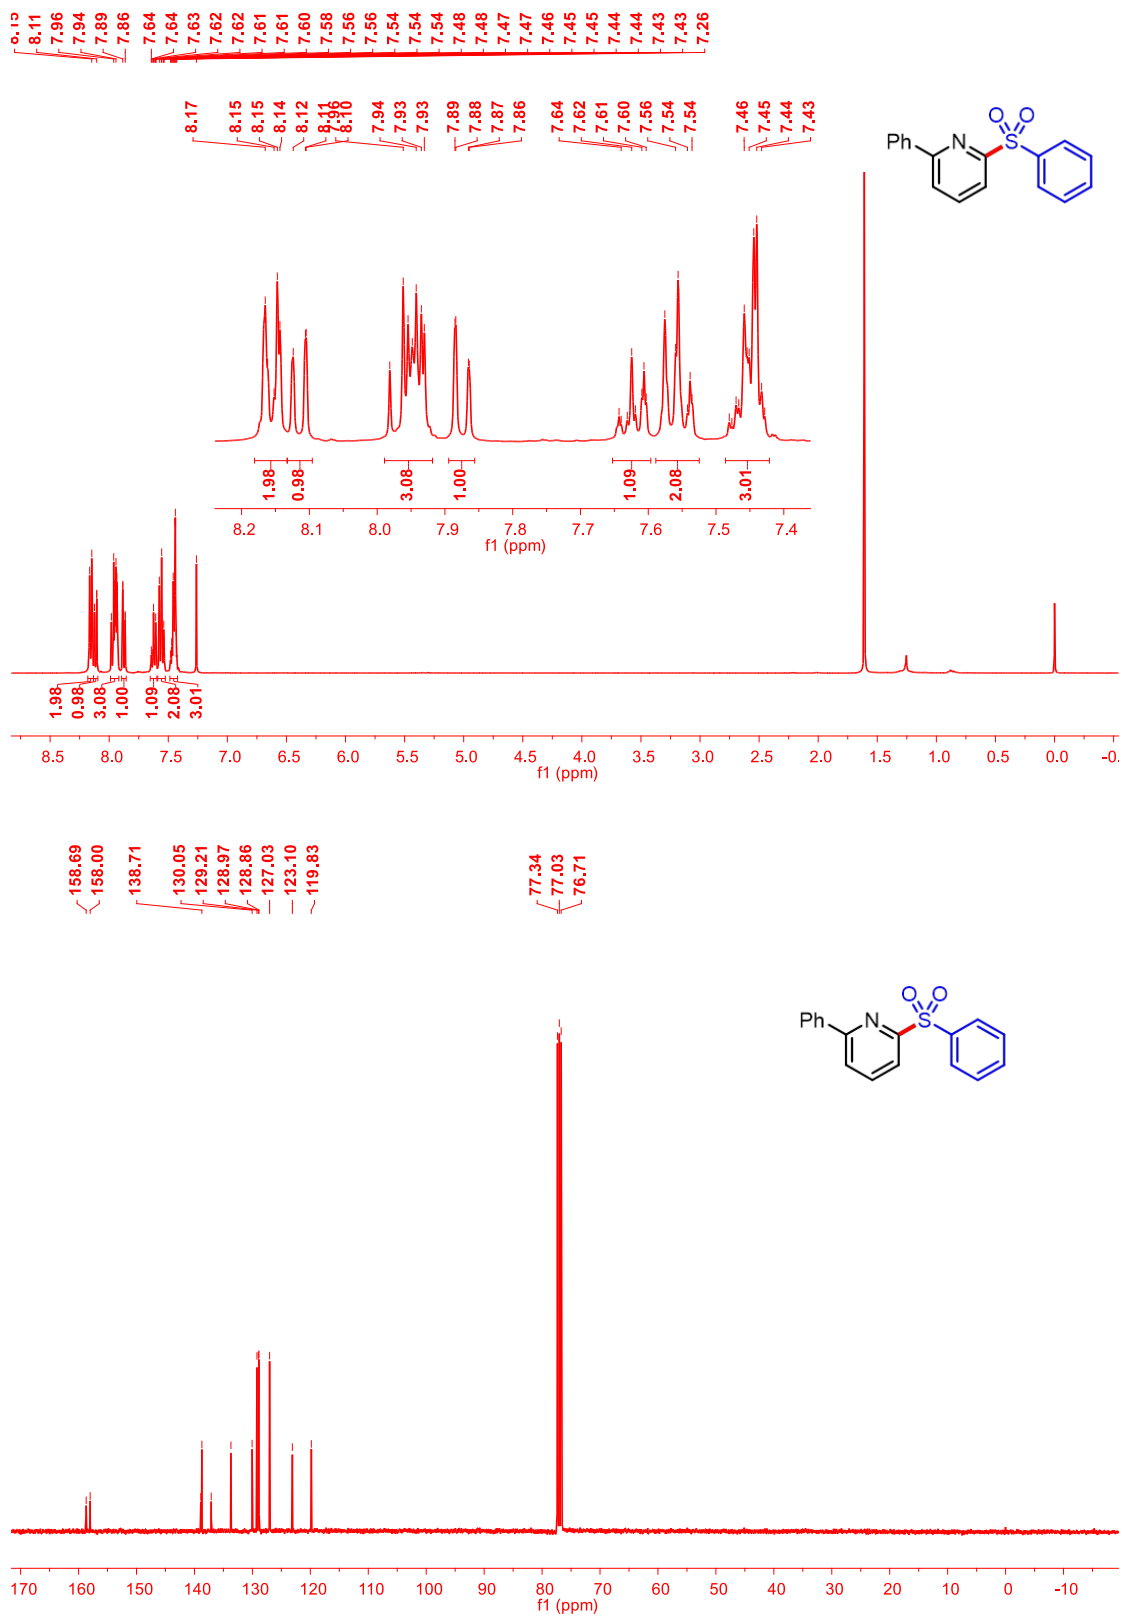



**Fig. S31** The  $^1\text{H}$  (400 MHz),  $^{13}\text{C}$  (101 MHz) NMR spectra for 4-(phenylsulfonyl)pyridine (**3ya**) in  $\text{CDCl}_3$

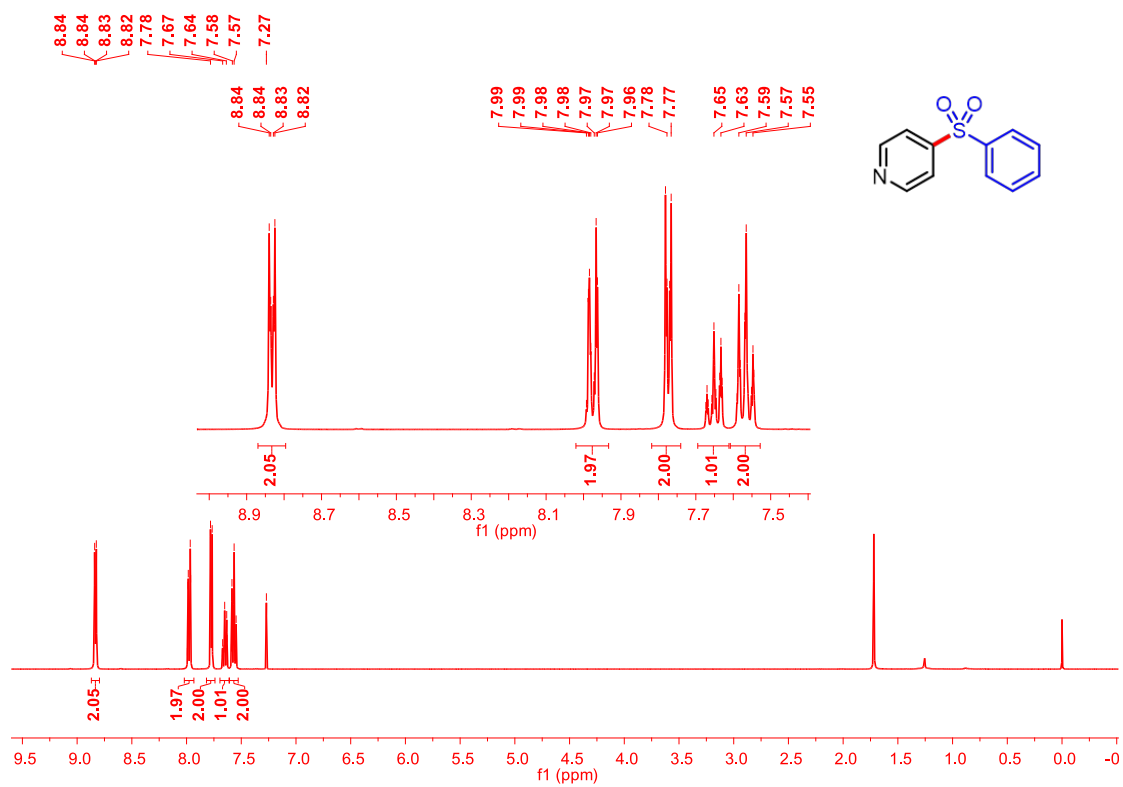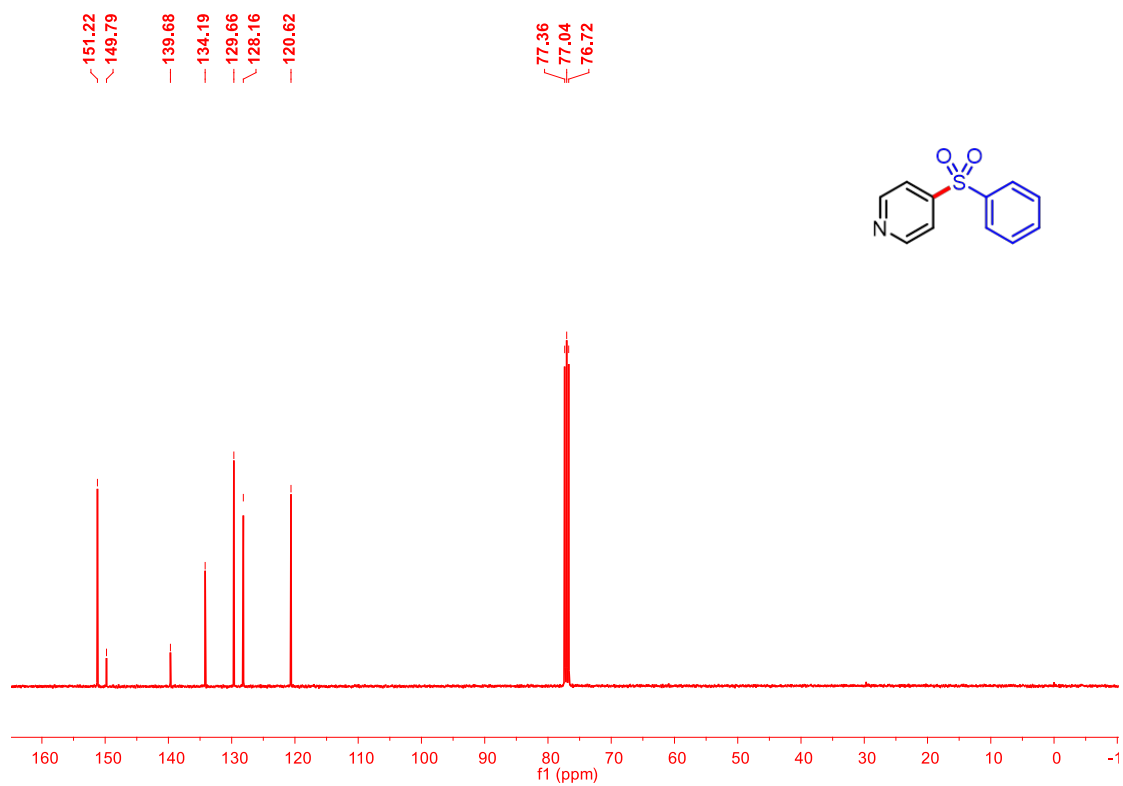

**Fig. S32** The  $^1\text{H}$  (400 MHz),  $^{13}\text{C}$  (101 MHz) NMR spectra for 2-methyl-4-(phenylsulfonyl)pyridine (**3za**) in  $\text{CDCl}_3$

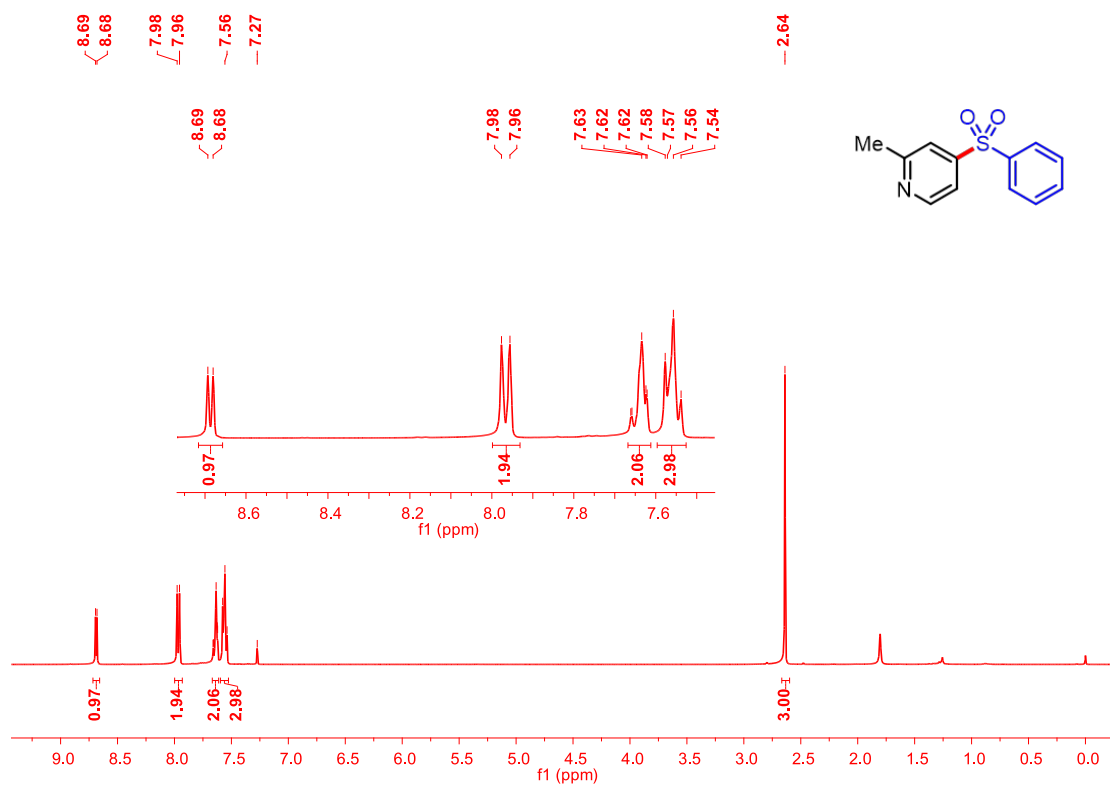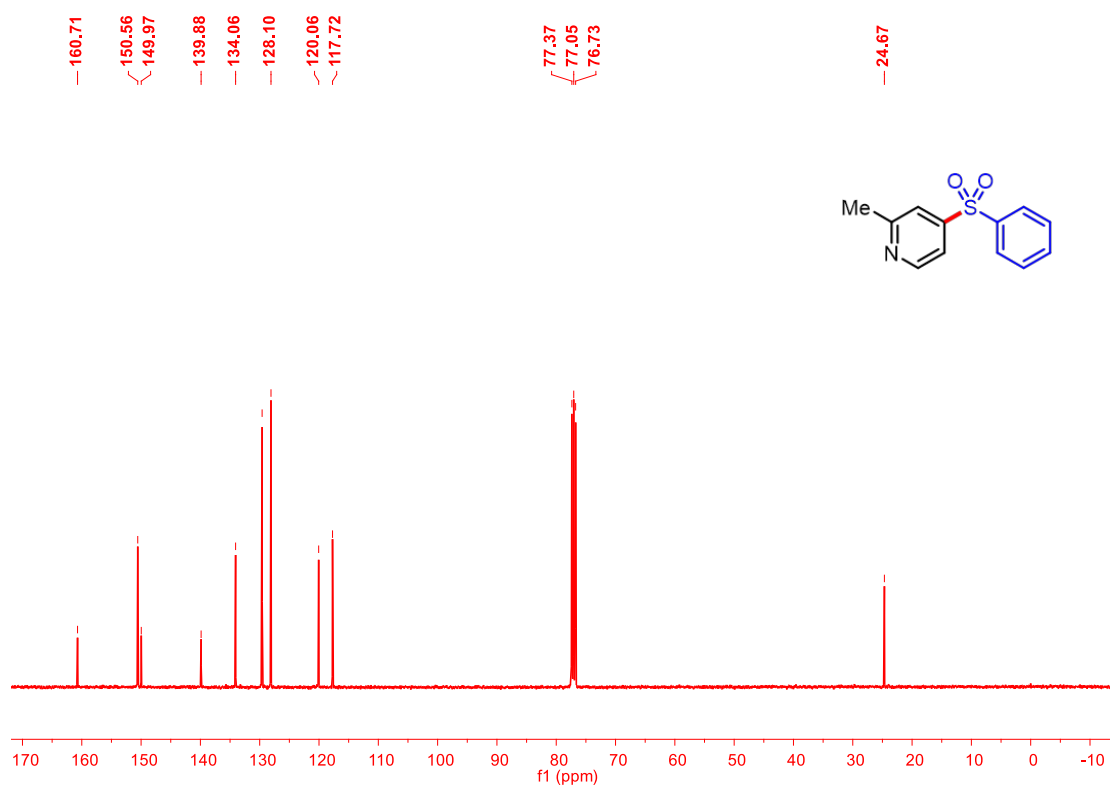

**Fig. S33** The  $^1\text{H}$  (400 MHz),  $^{13}\text{C}$  (101 MHz) NMR spectra for 3-(phenylsulfonyl)quinoline (**3a'a**) in  $\text{CDCl}_3$

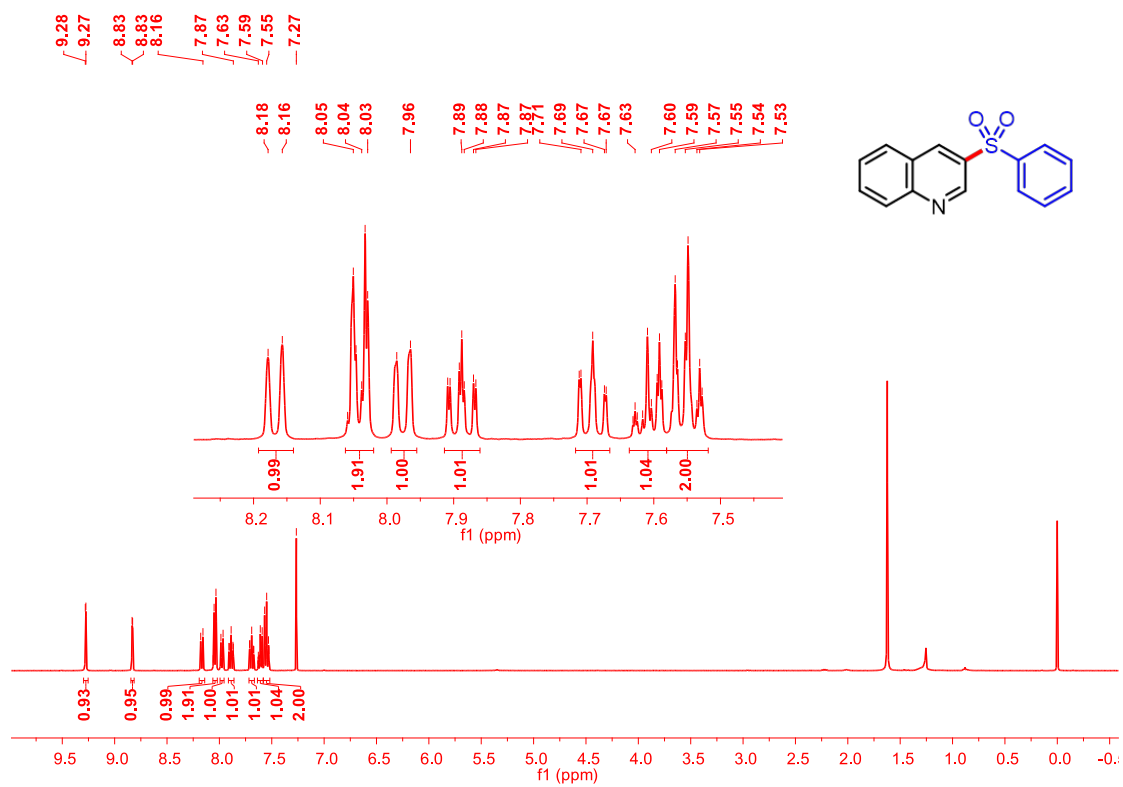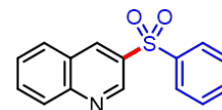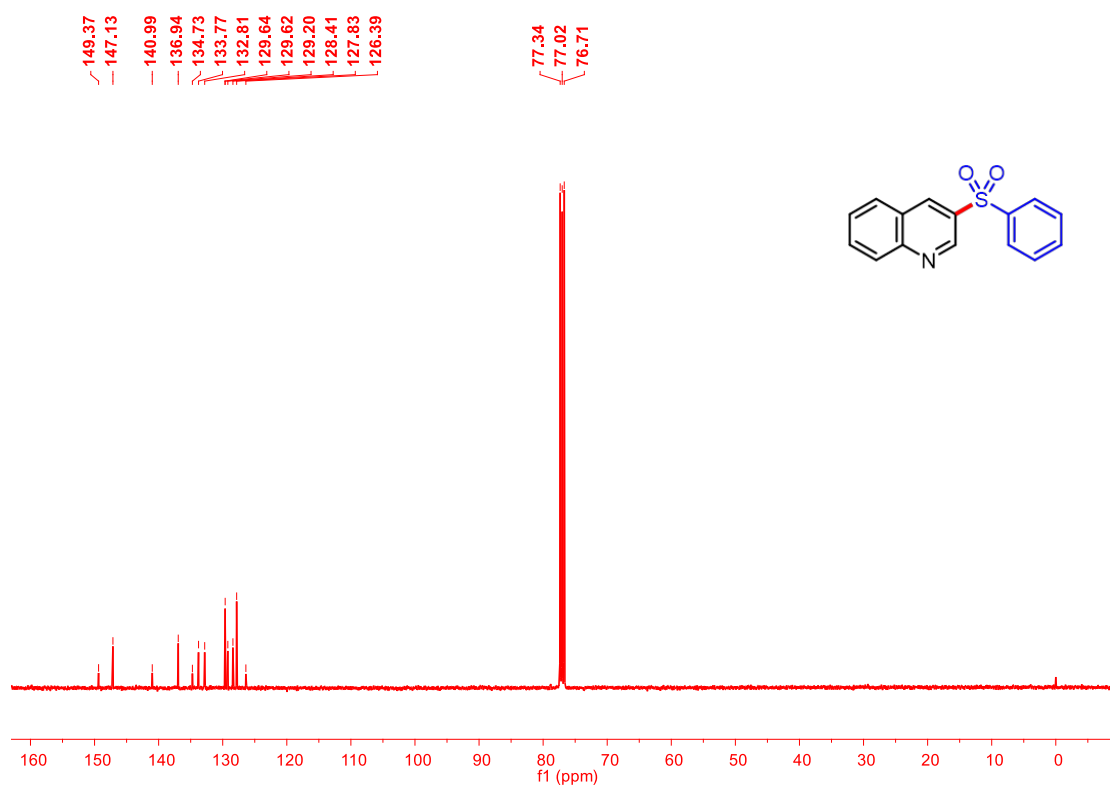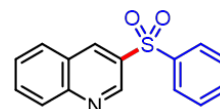

**Fig. S34** The  $^1\text{H}$  (400 MHz),  $^{13}\text{C}$  (101 MHz) NMR spectra for 2-(phenylsulfonyl)quinoline (**3b'a**) in  $\text{CDCl}_3$

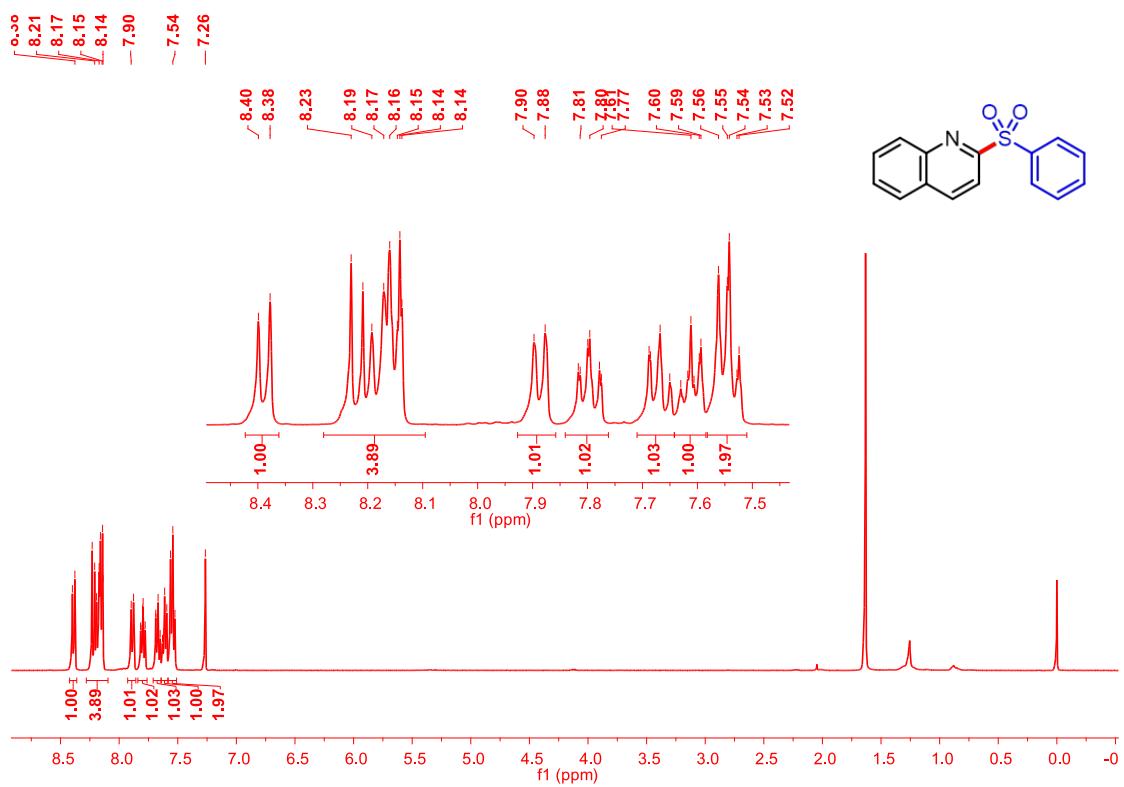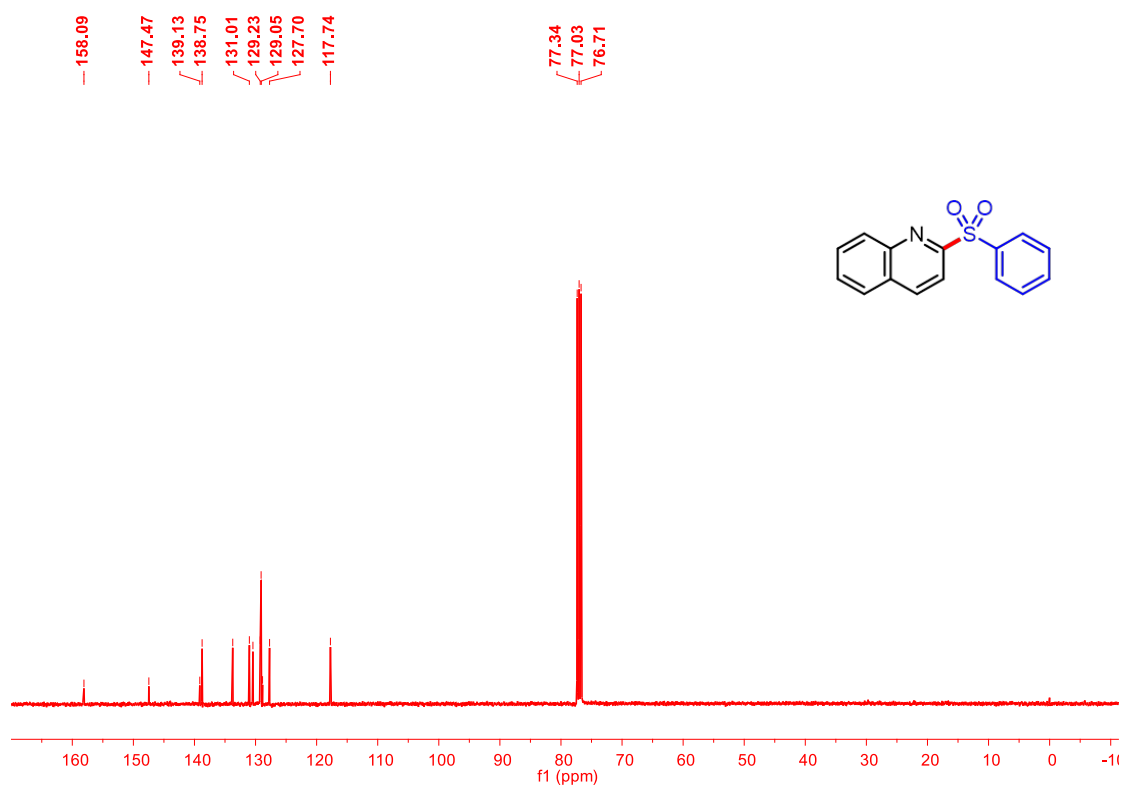

**Fig. S35** The  $^1\text{H}$  (400 MHz),  $^{13}\text{C}$  (101 MHz) and  $^{19}\text{F}$  (377 MHz) NMR spectra for 4-((4-fluorophenyl)sulfonyl)benzotrile (**3ab**) in  $\text{CDCl}_3$

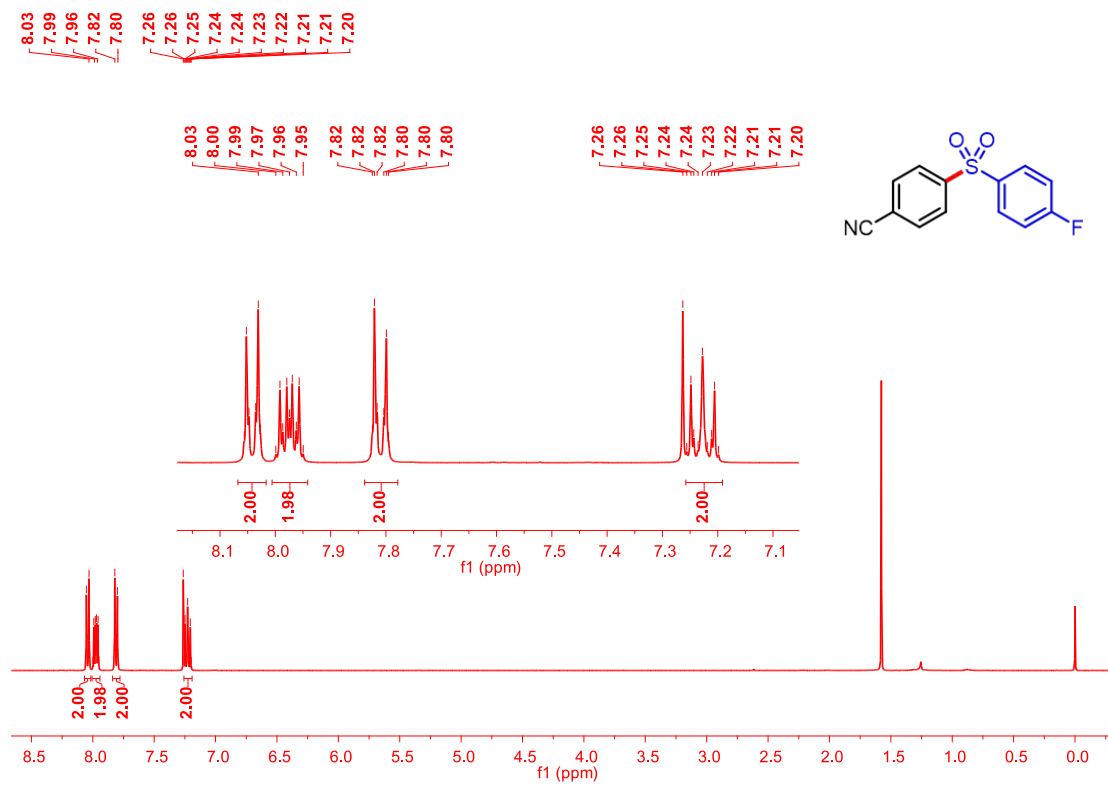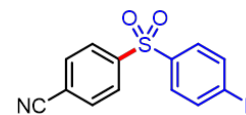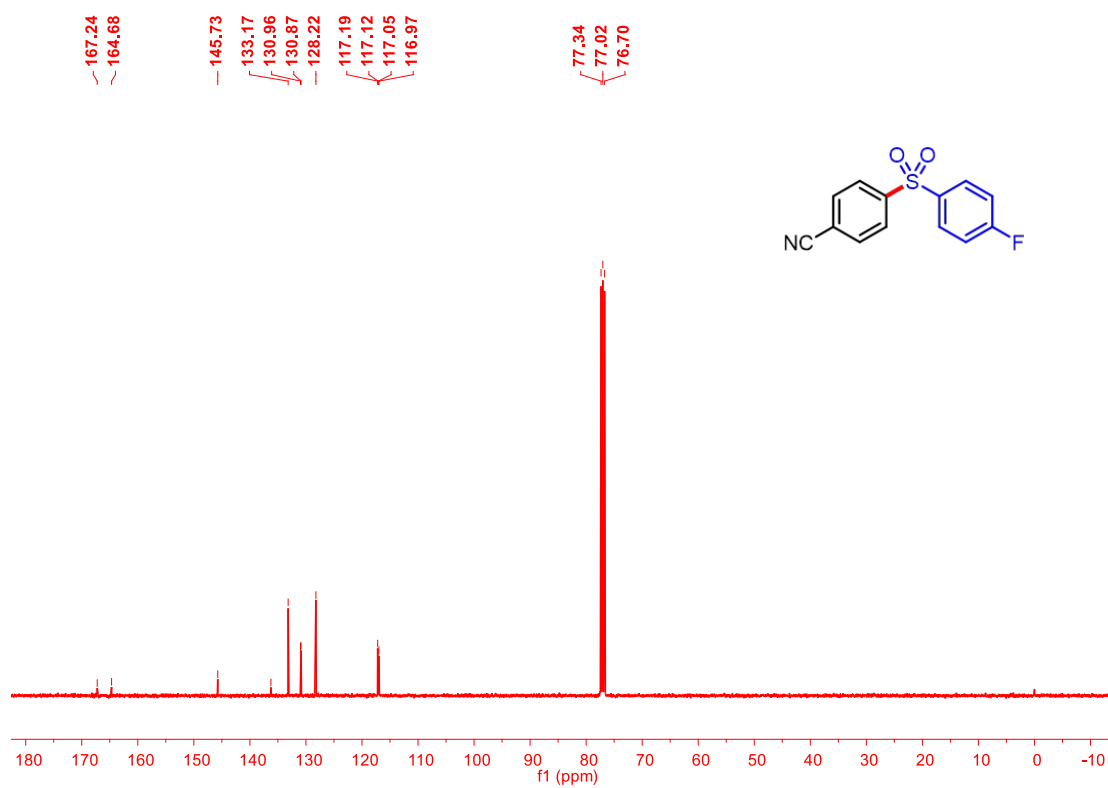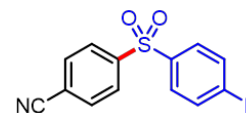

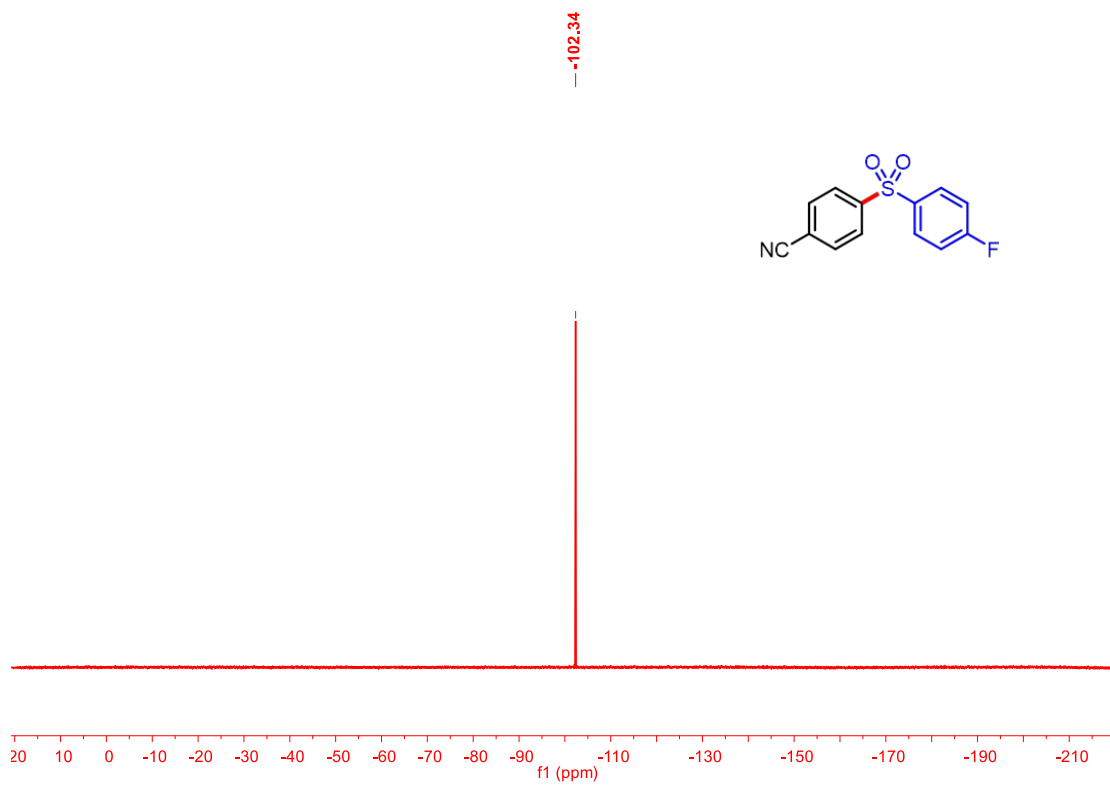

**Fig. S36** The  $^1\text{H}$  (400 MHz),  $^{13}\text{C}$  (101 MHz) NMR spectra for 4-((4-chlorophenyl)sulfonyl)benzotrile (**3ac**) in  $\text{CDCl}_3$

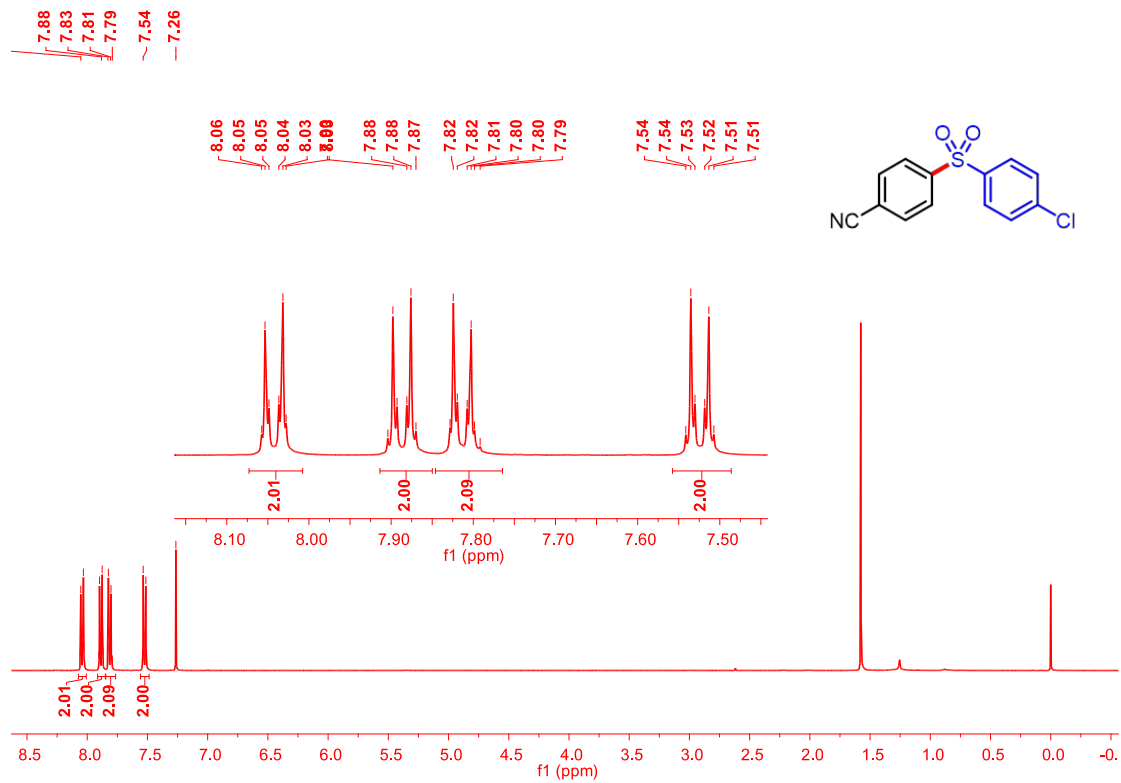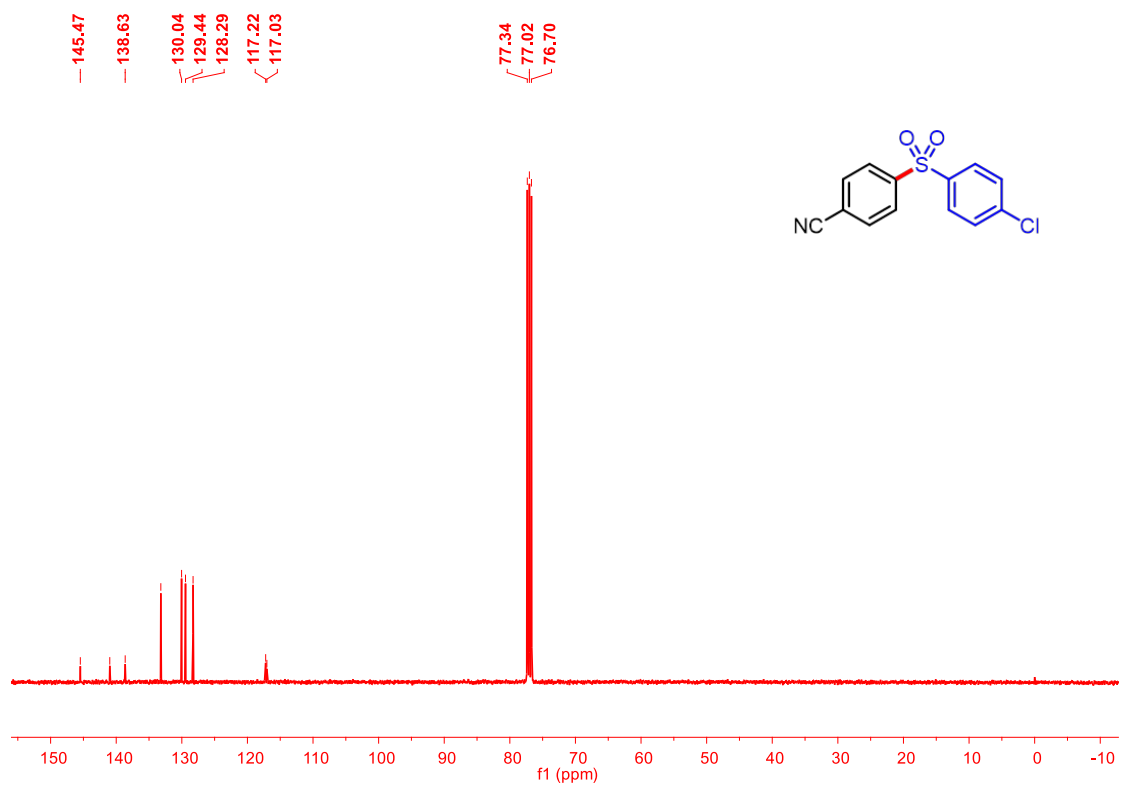

**Fig. S37** The  $^1\text{H}$  (400 MHz),  $^{13}\text{C}$  (101 MHz) NMR spectra for 4-tosylbenzonitrile (**3ad**) in  $\text{CDCl}_3$

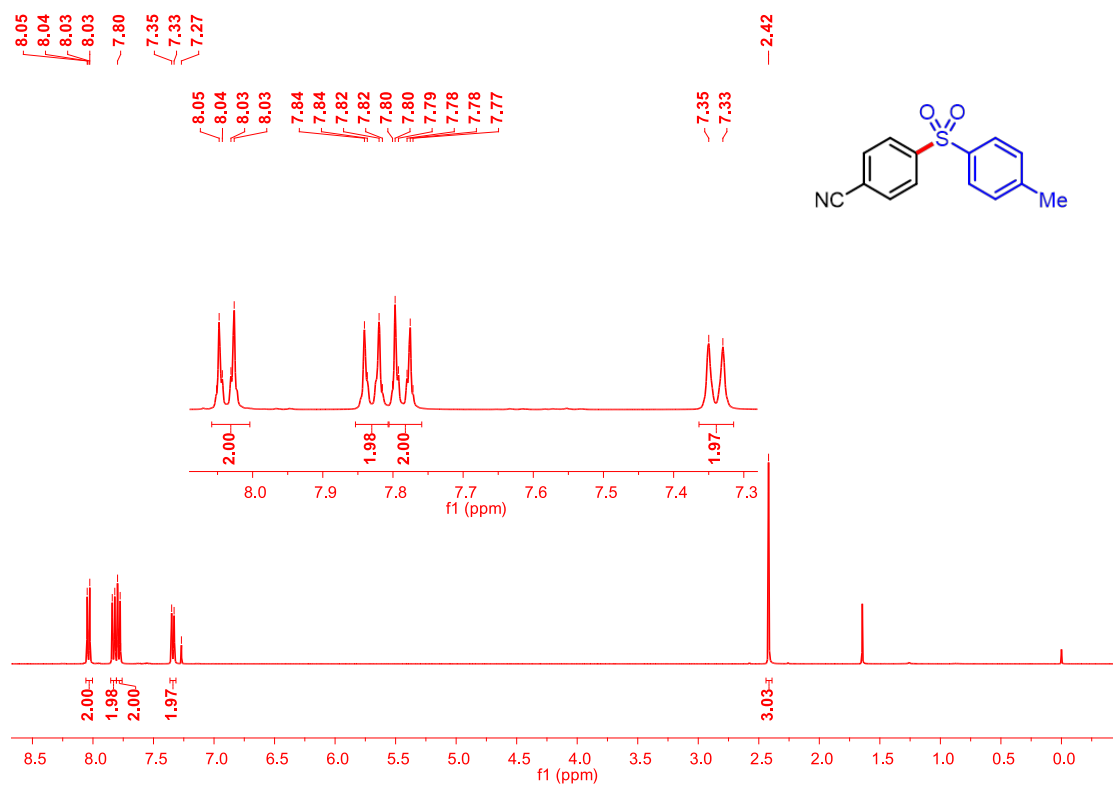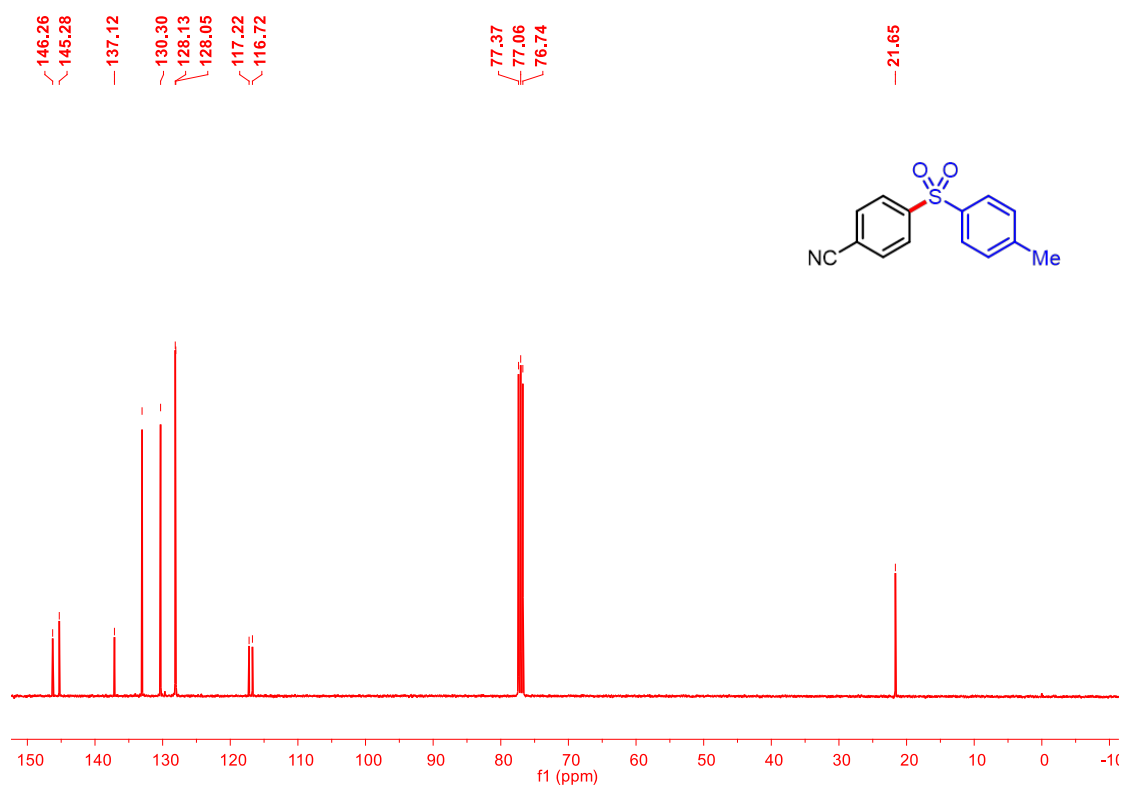



**Fig. S38** The  $^1\text{H}$  (400 MHz),  $^{13}\text{C}$  (101 MHz) NMR spectra for 4-((4-(tert-butyl)phenyl)sulfonyl)benzonitrile (**3ae**) in  $\text{CDCl}_3$

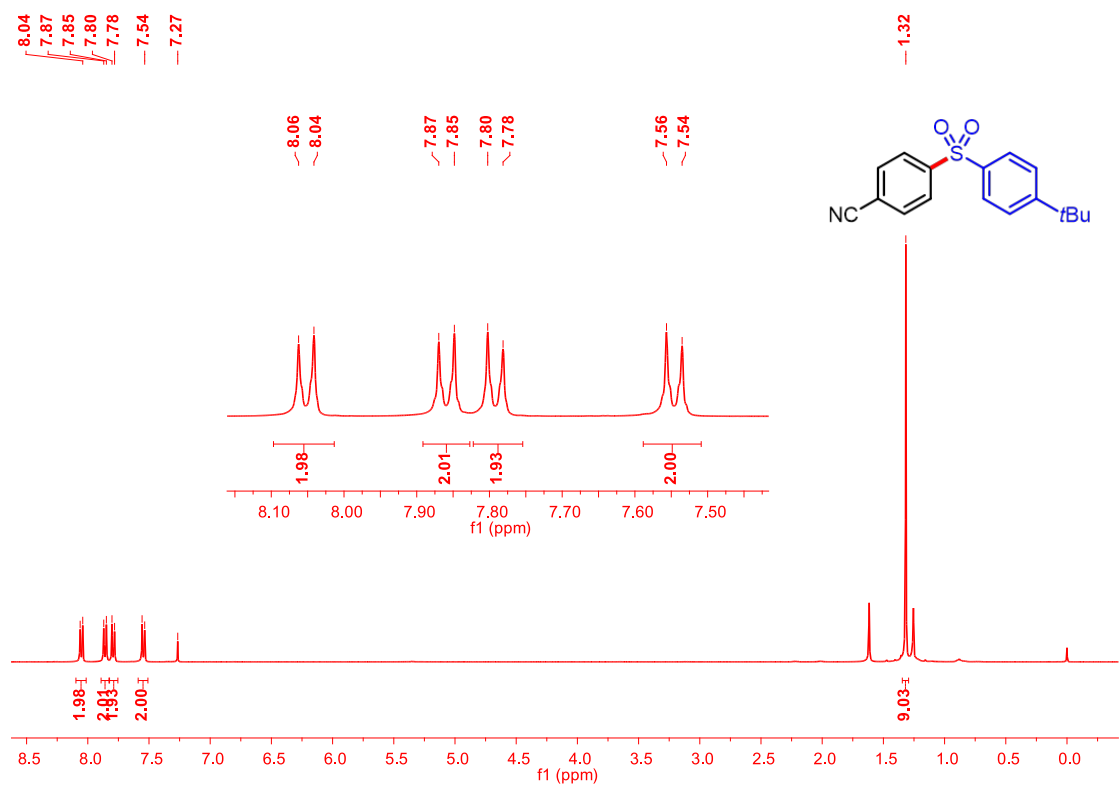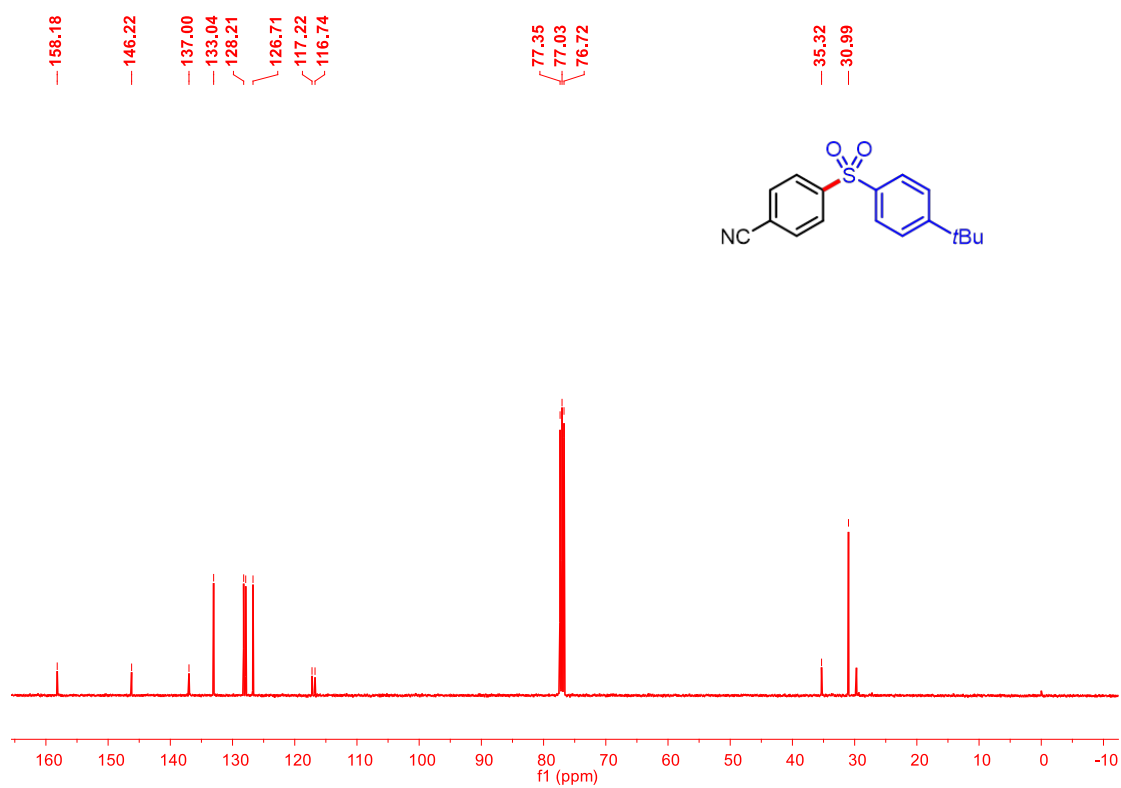

**Fig. S39** The  $^1\text{H}$  (400 MHz),  $^{13}\text{C}$  (101 MHz) NMR spectra for 4-((4-methoxyphenyl)sulfonyl)benzotrile (**3af**) in  $\text{CDCl}_3$

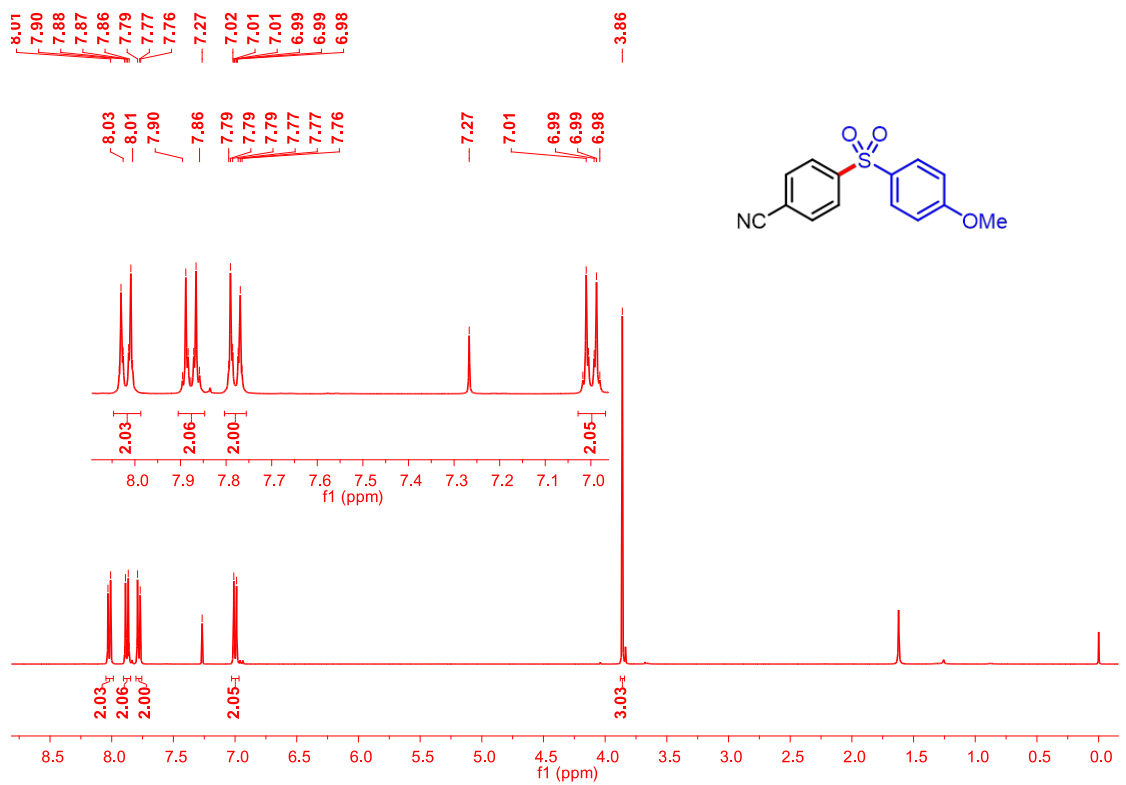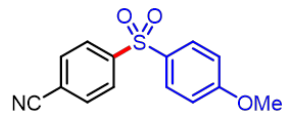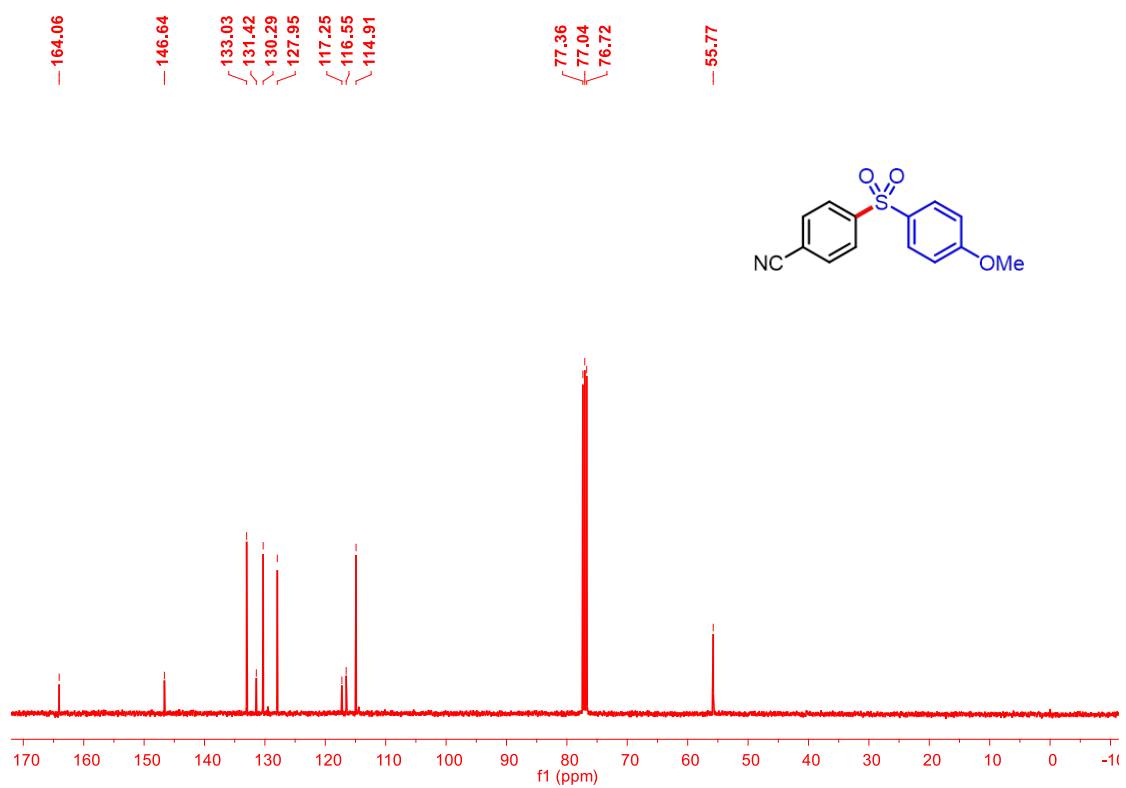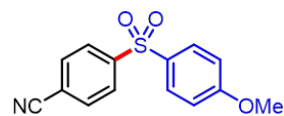

**Fig. S40** The  $^1\text{H}$  (400 MHz),  $^{13}\text{C}$  (101 MHz) NMR spectra for 4-(m-tolylsulfonyl)benzonitrile (**3ag**) in  $\text{CDCl}_3$

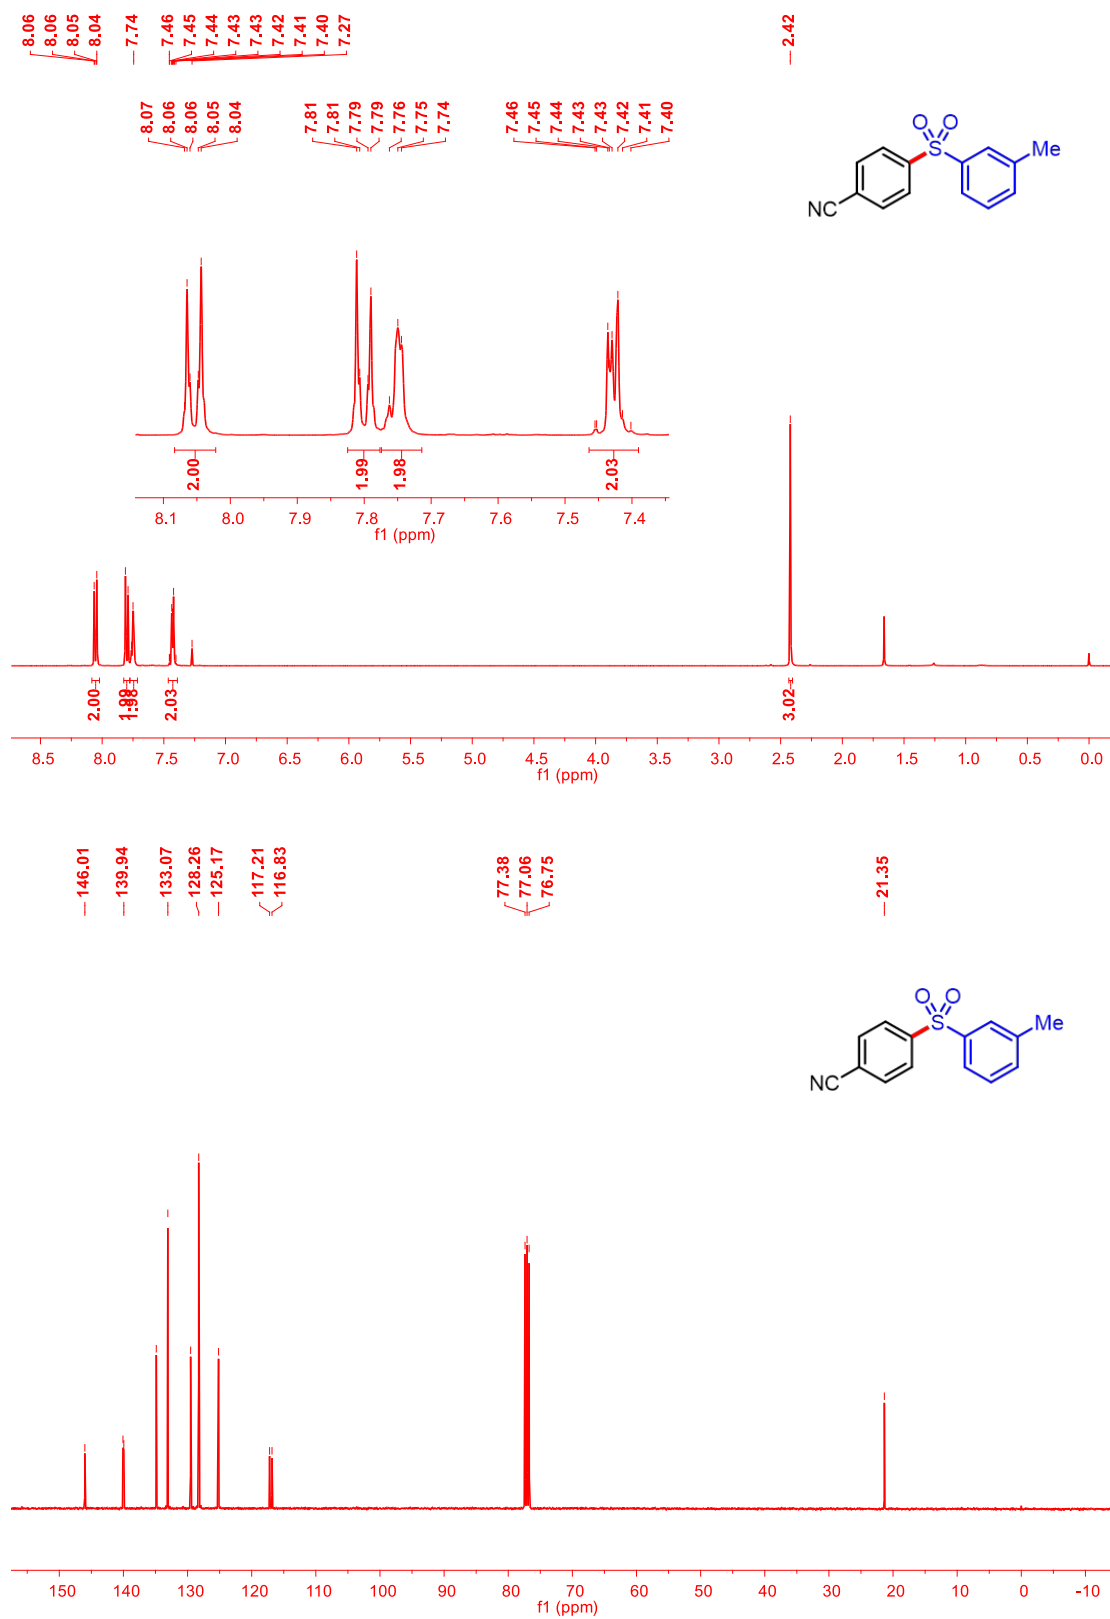

**Fig. S41** The  $^1\text{H}$  (400 MHz),  $^{13}\text{C}$  (101 MHz), and  $^{19}\text{F}$  (377 MHz) NMR spectra for 4-((3-(trifluoromethyl)phenyl)sulfonyl)benzonitrile (**3ah**) in  $\text{CDCl}_3$

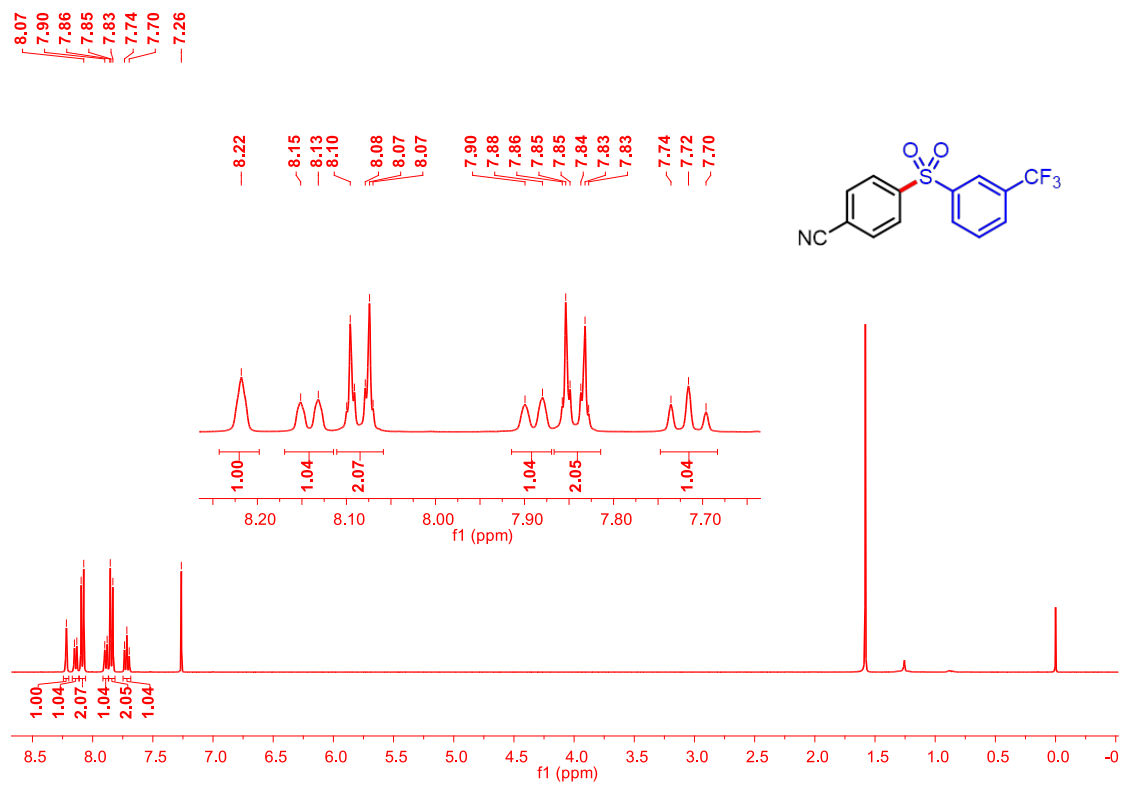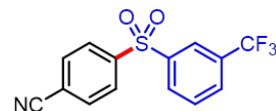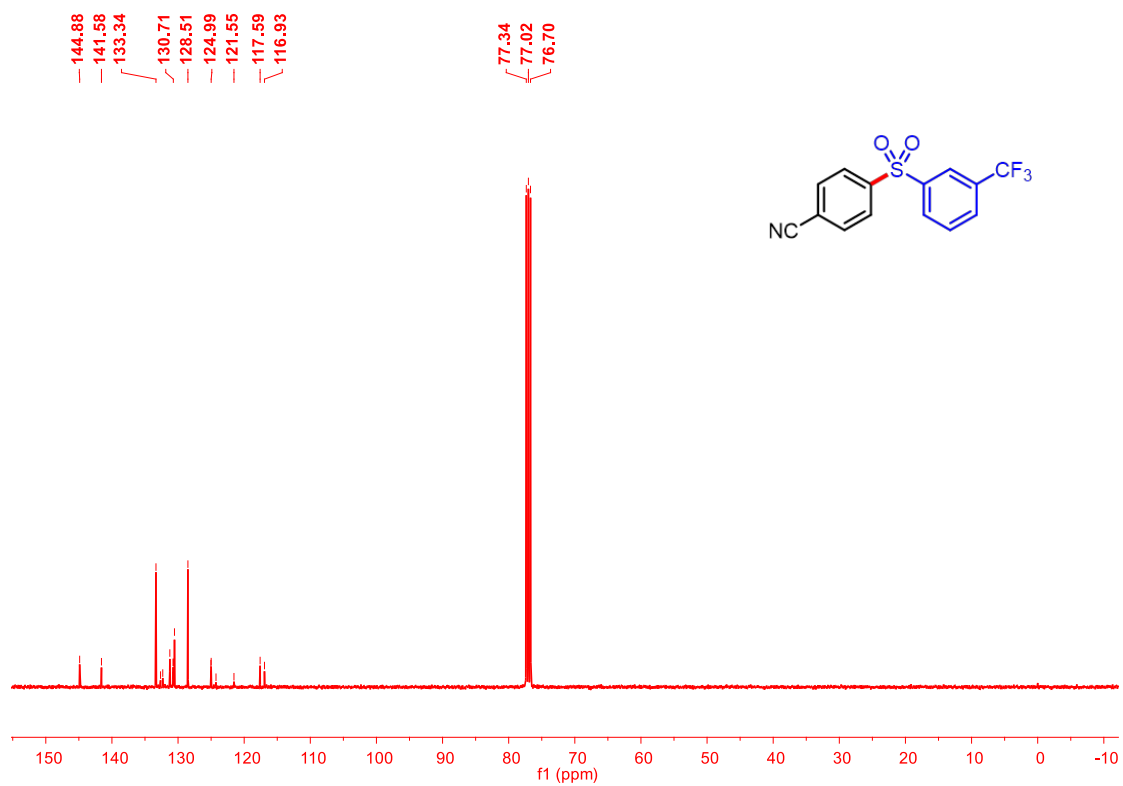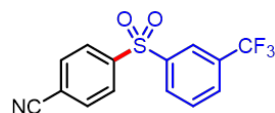

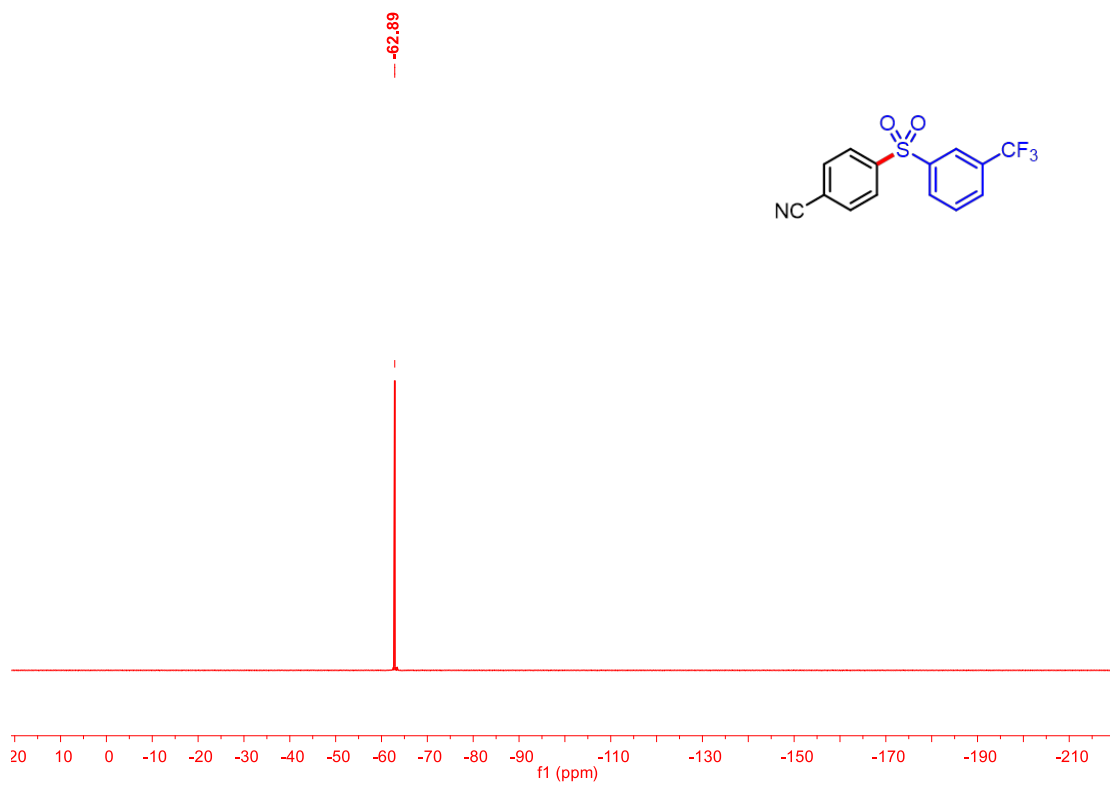

**Fig. S42** The  $^1\text{H}$  (400 MHz),  $^{13}\text{C}$  (101 MHz) and  $^{19}\text{F}$  (377 MHz) NMR spectra for 4-((3,5-difluorophenyl)sulfonyl)benzonitrile (**3ai**) in  $\text{CDCl}_3$

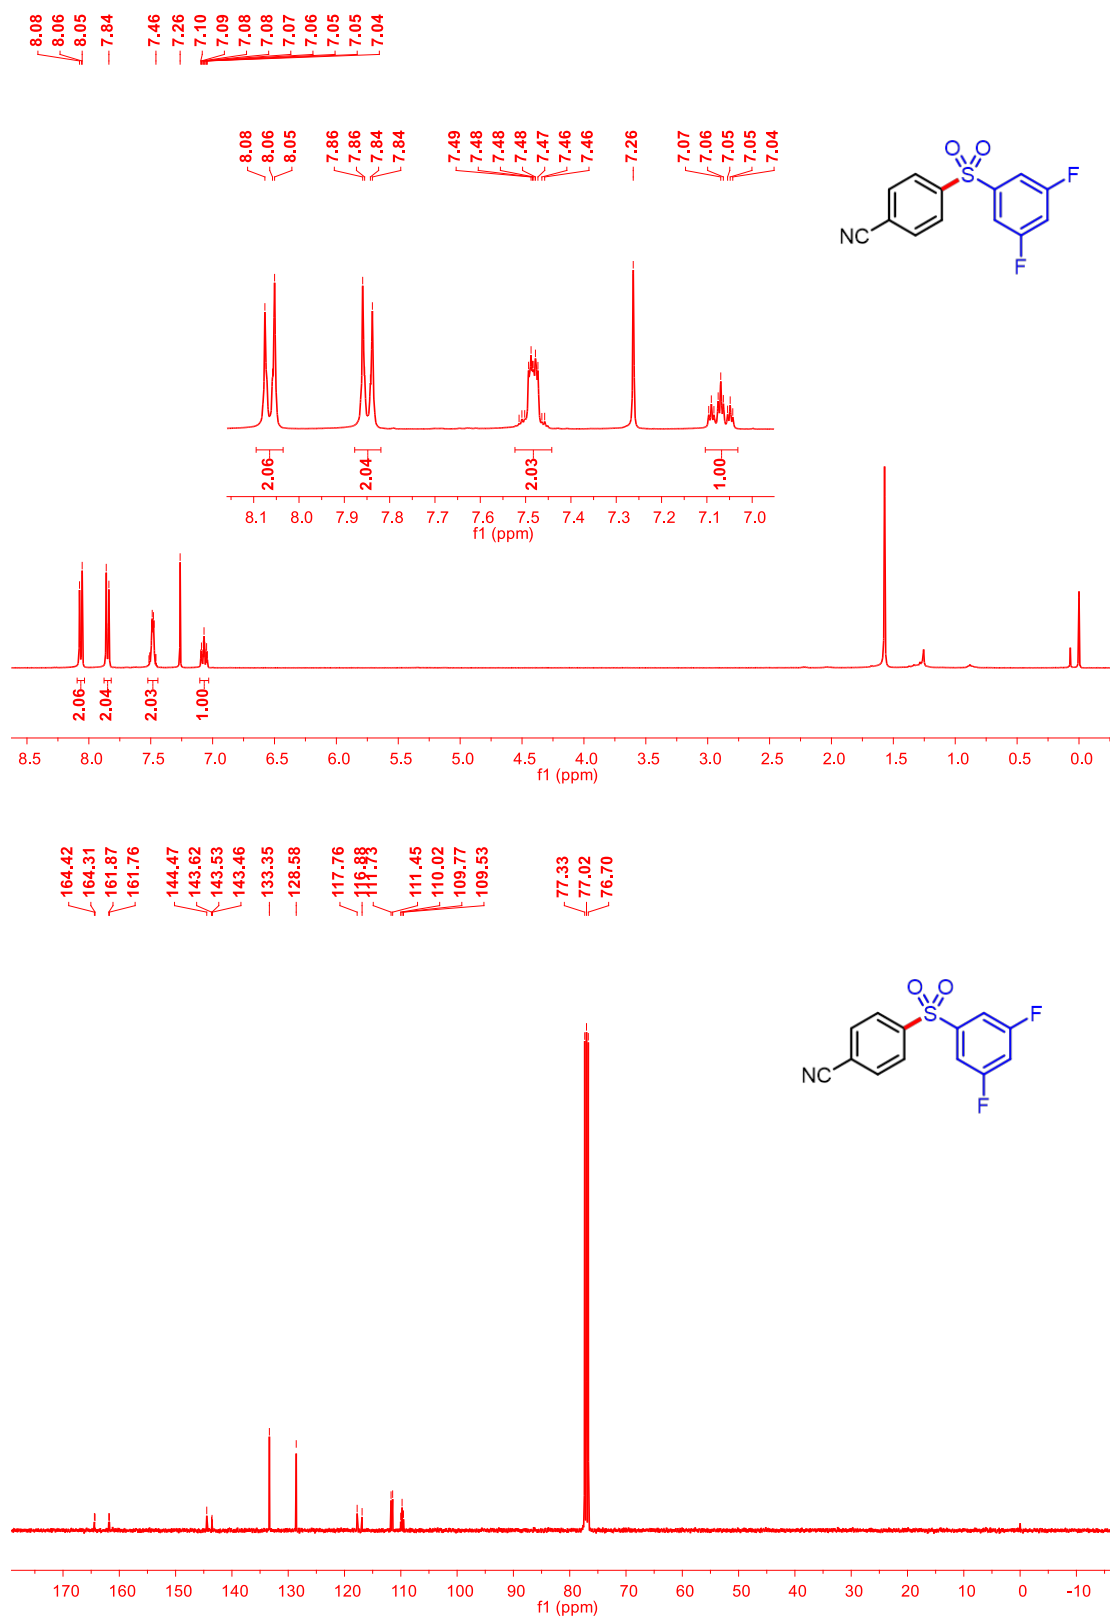

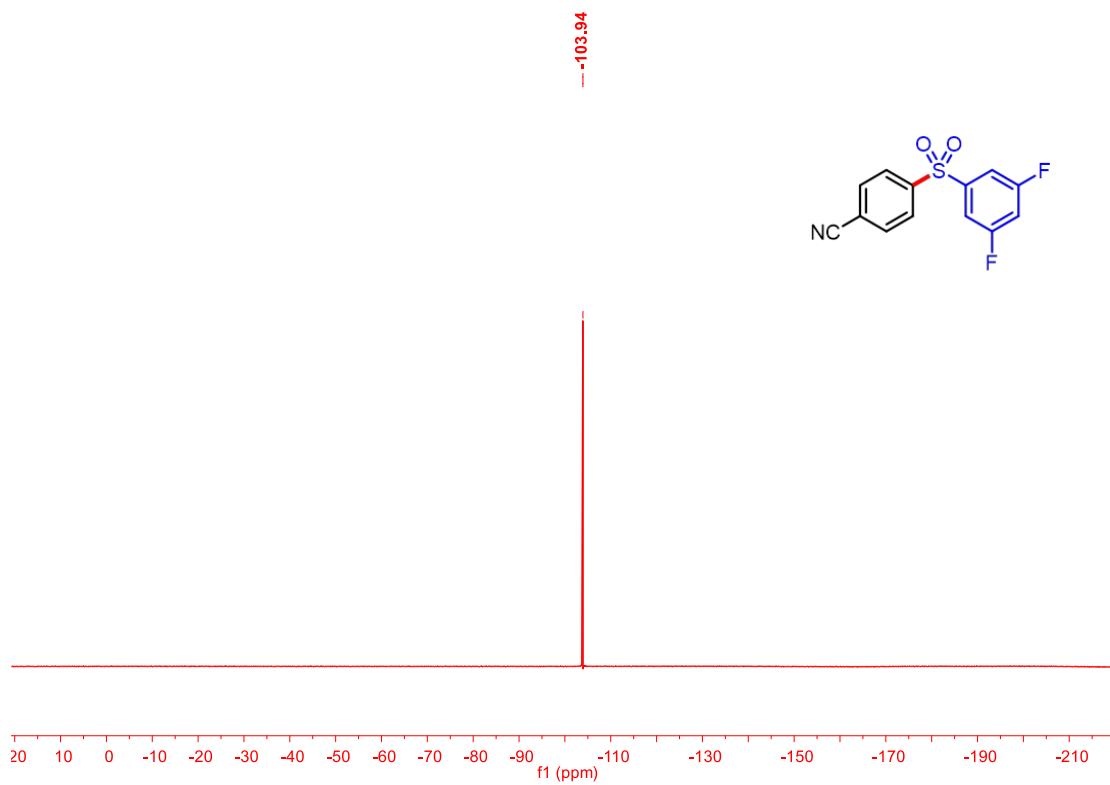

**Fig. S43** The  $^1\text{H}$  (400 MHz),  $^{13}\text{C}$  (101 MHz) NMR spectra for 4-(mesitylsulfonyl)benzonitrile (**3aj**) in  $\text{CDCl}_3$

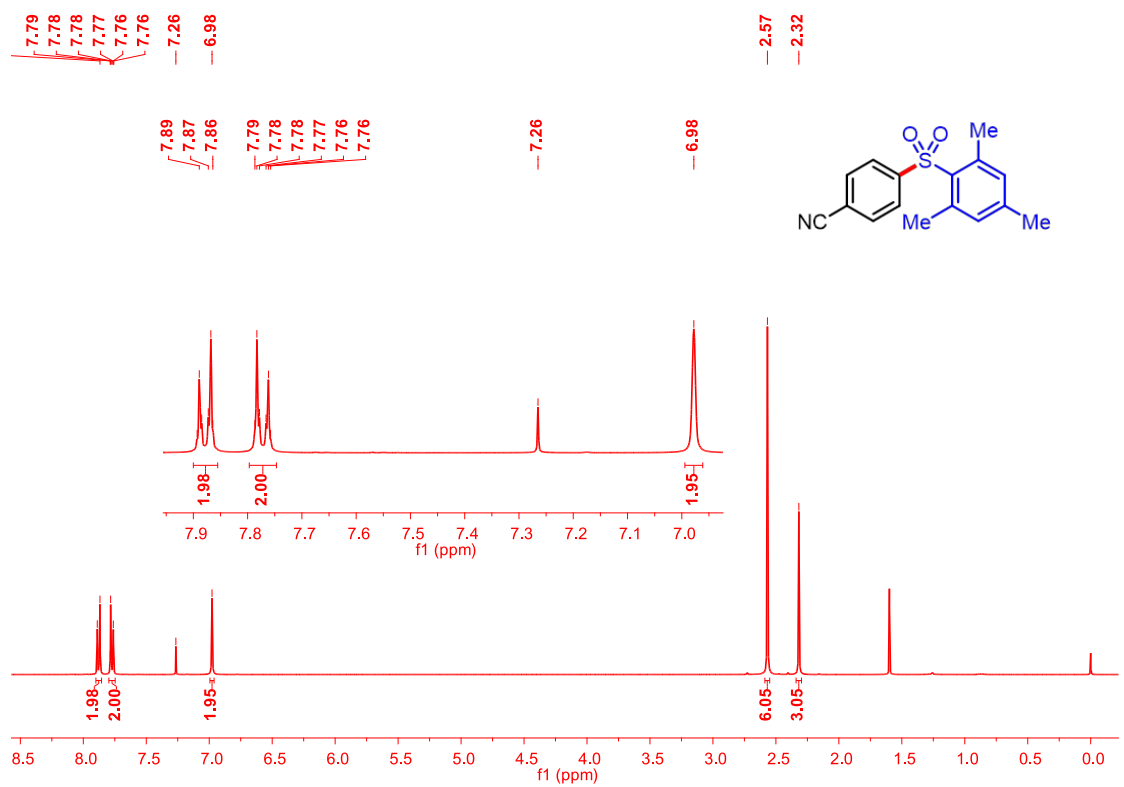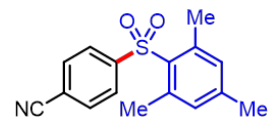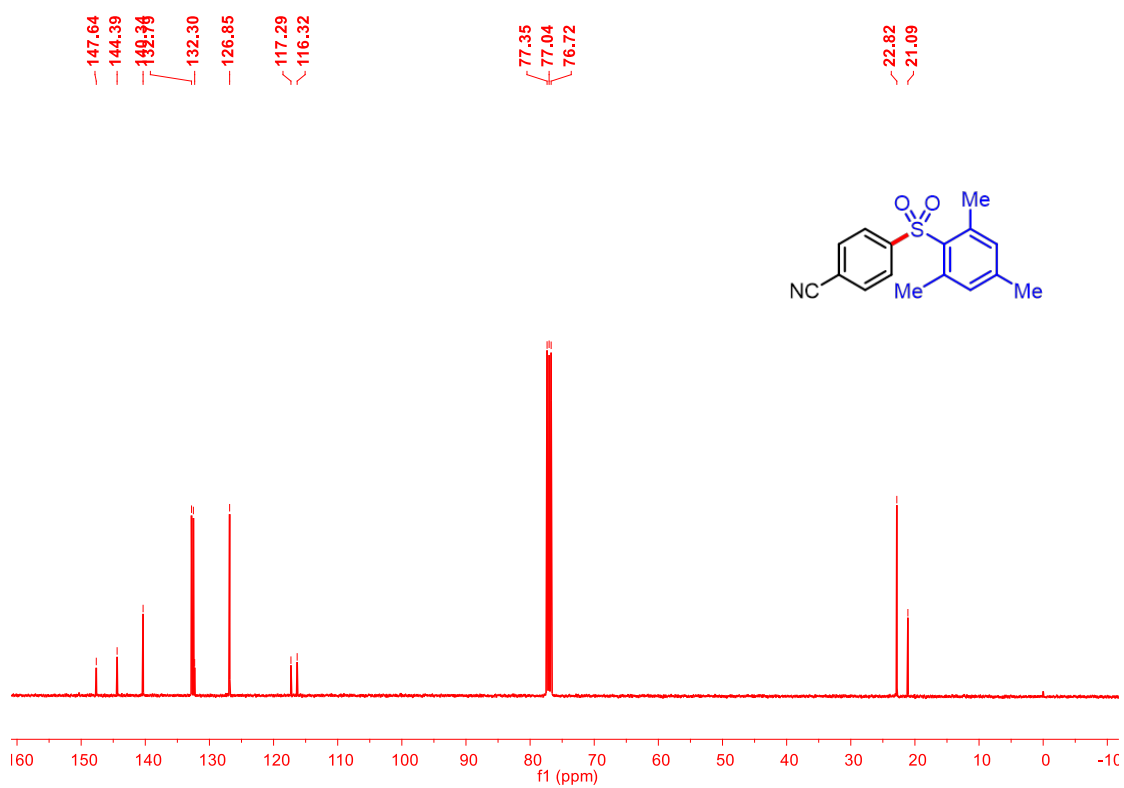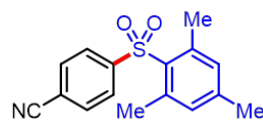



**Fig. S44** The  $^1\text{H}$  (400 MHz),  $^{13}\text{C}$  (101 MHz) NMR spectra for 4-(naphthalen-2-ylsulfonyl)benzotrile (**3ak**) in  $\text{CDCl}_3$

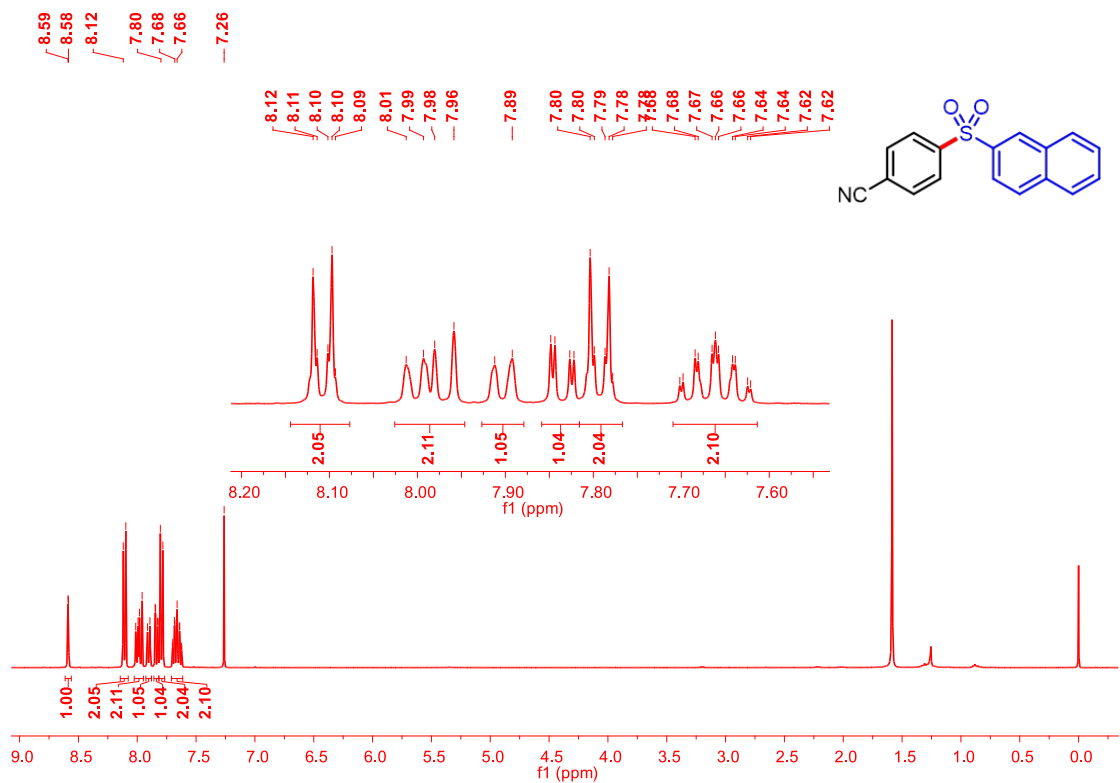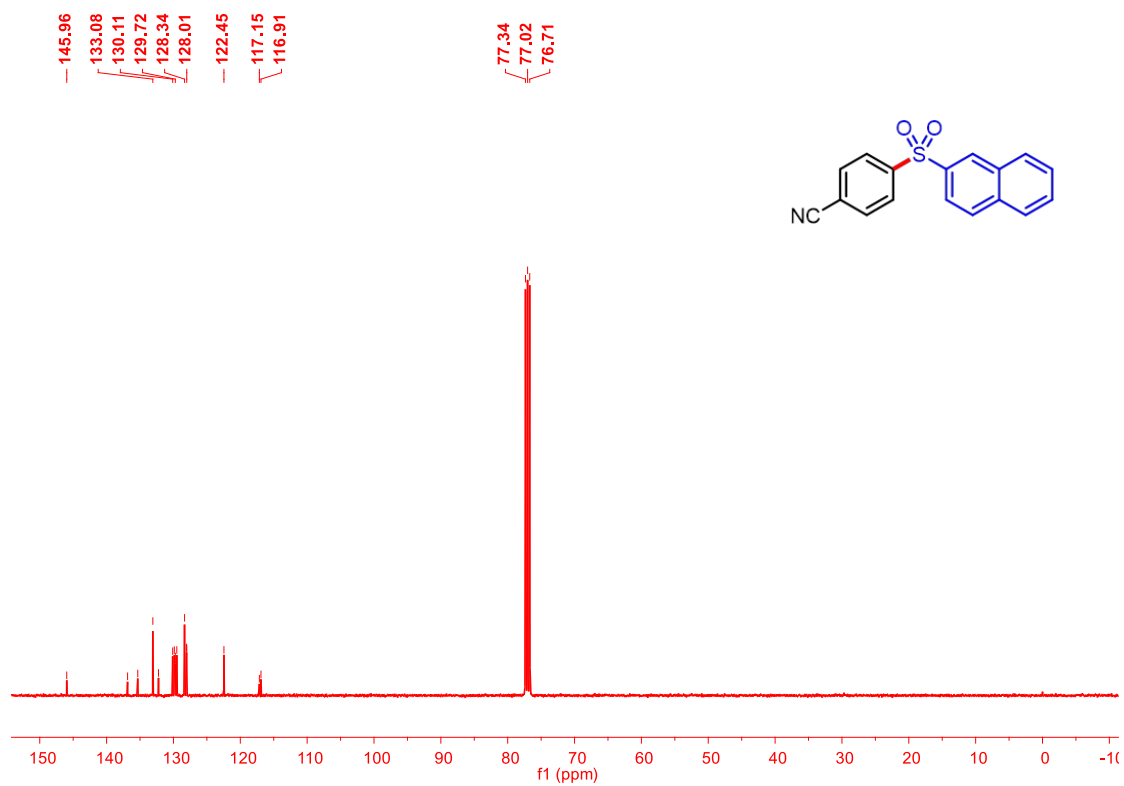

**Fig. S45** The  $^1\text{H}$  (400 MHz),  $^{13}\text{C}$  (101 MHz) NMR spectra for 4-(pyridin-3-ylsulfonyl)benzonitrile (**3a1**) in  $\text{CDCl}_3$

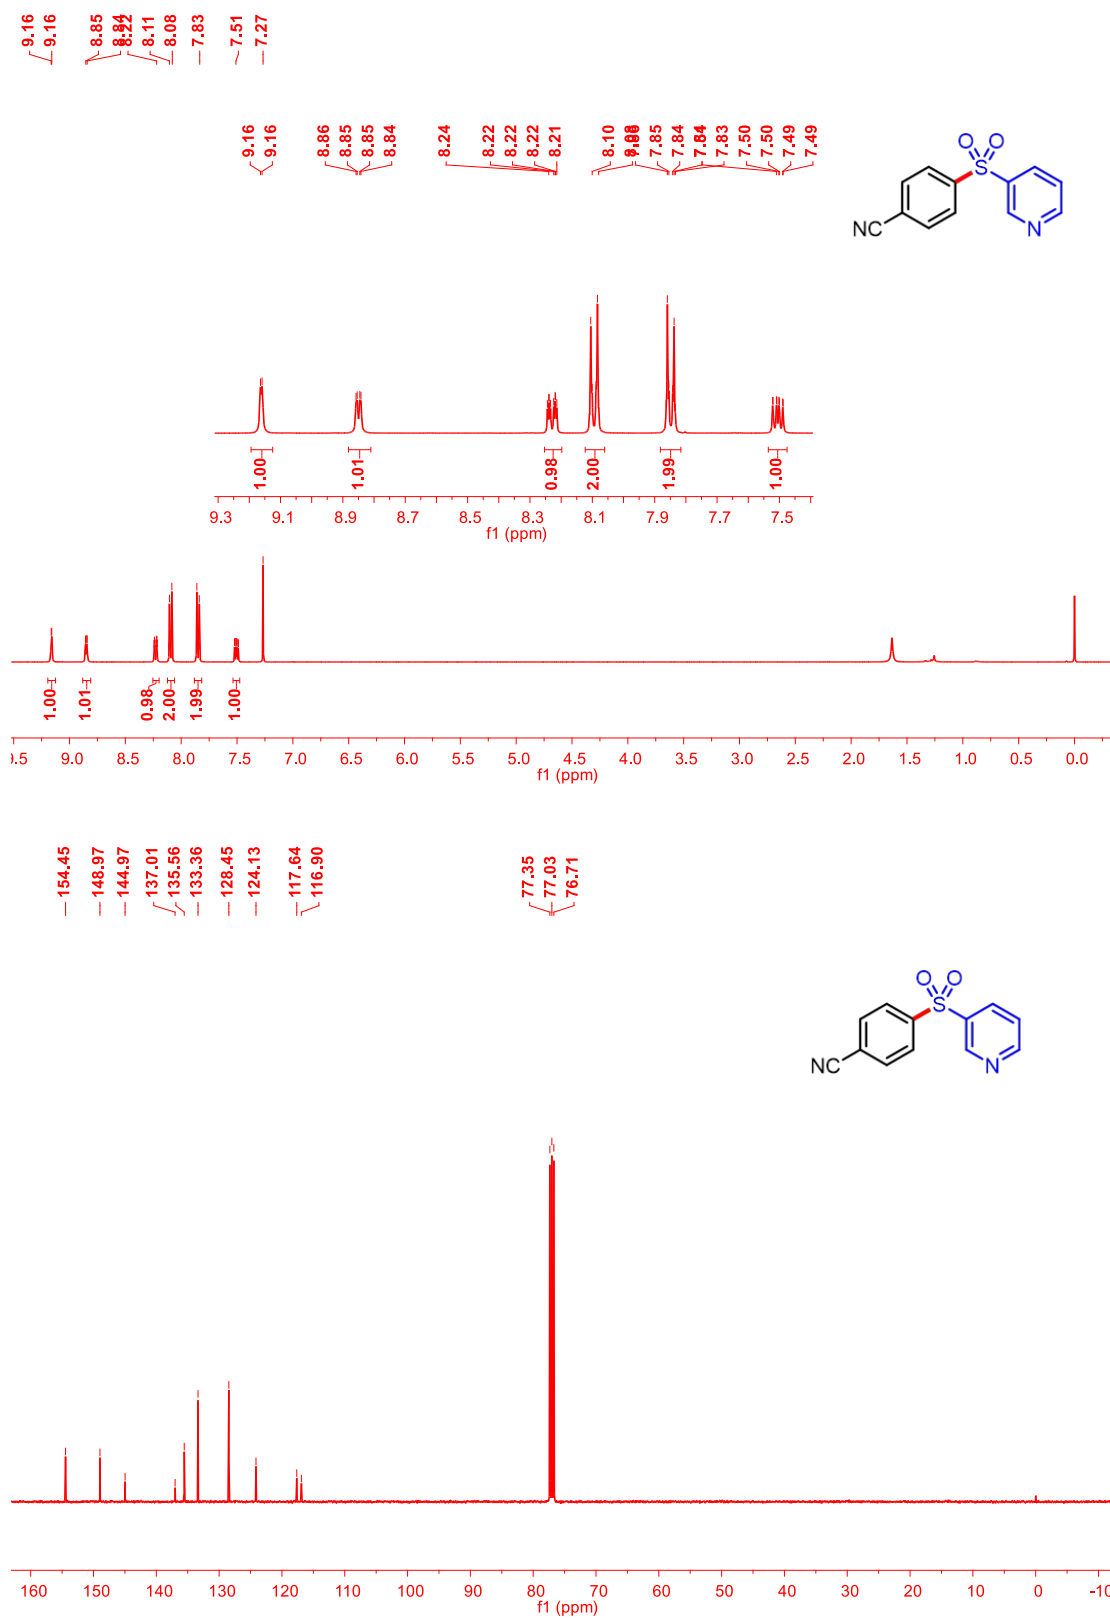

**Fig. S46** The  $^1\text{H}$  (400 MHz),  $^{13}\text{C}$  (101 MHz) NMR spectra for 8-chloro-3-(phenylsulfonyl)quinoline (**3c'a**) in  $\text{CDCl}_3$

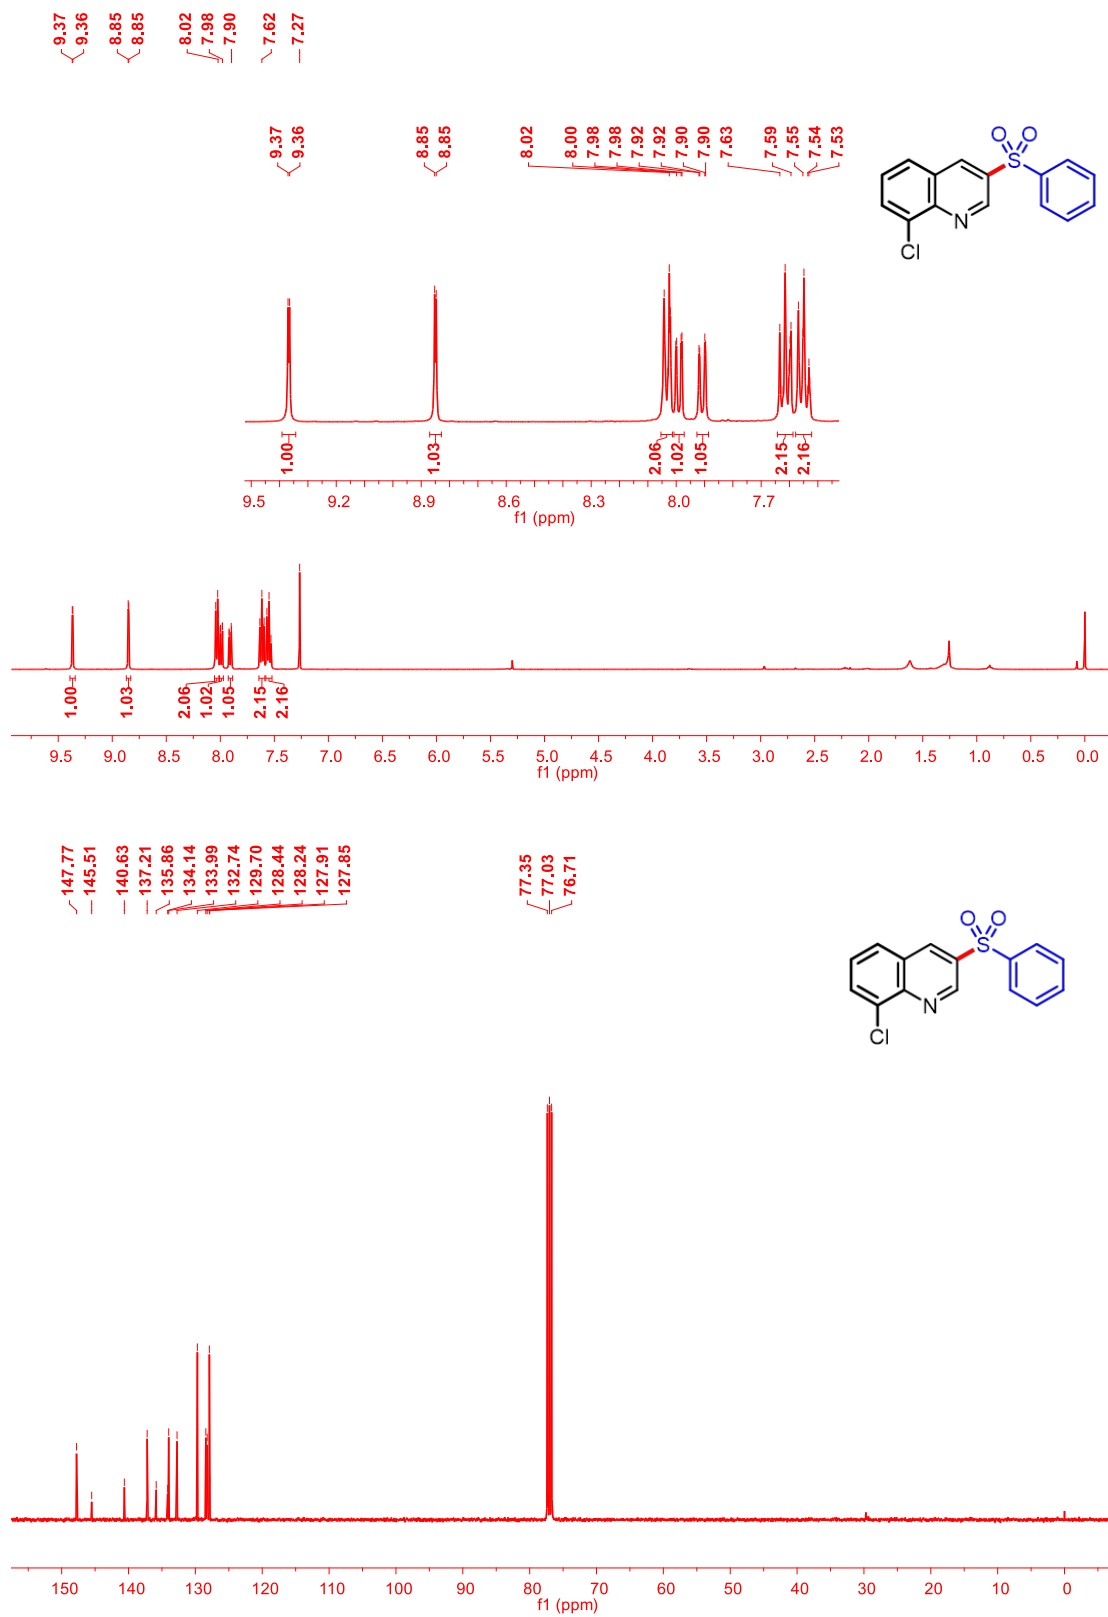

**Fig. S47** The  $^1\text{H}$  (400 MHz),  $^{13}\text{C}$  (101 MHz) NMR spectra for N-phenyl-2-(phenylsulfonyl)benzamide (**3d'a**) in  $\text{CDCl}_3$

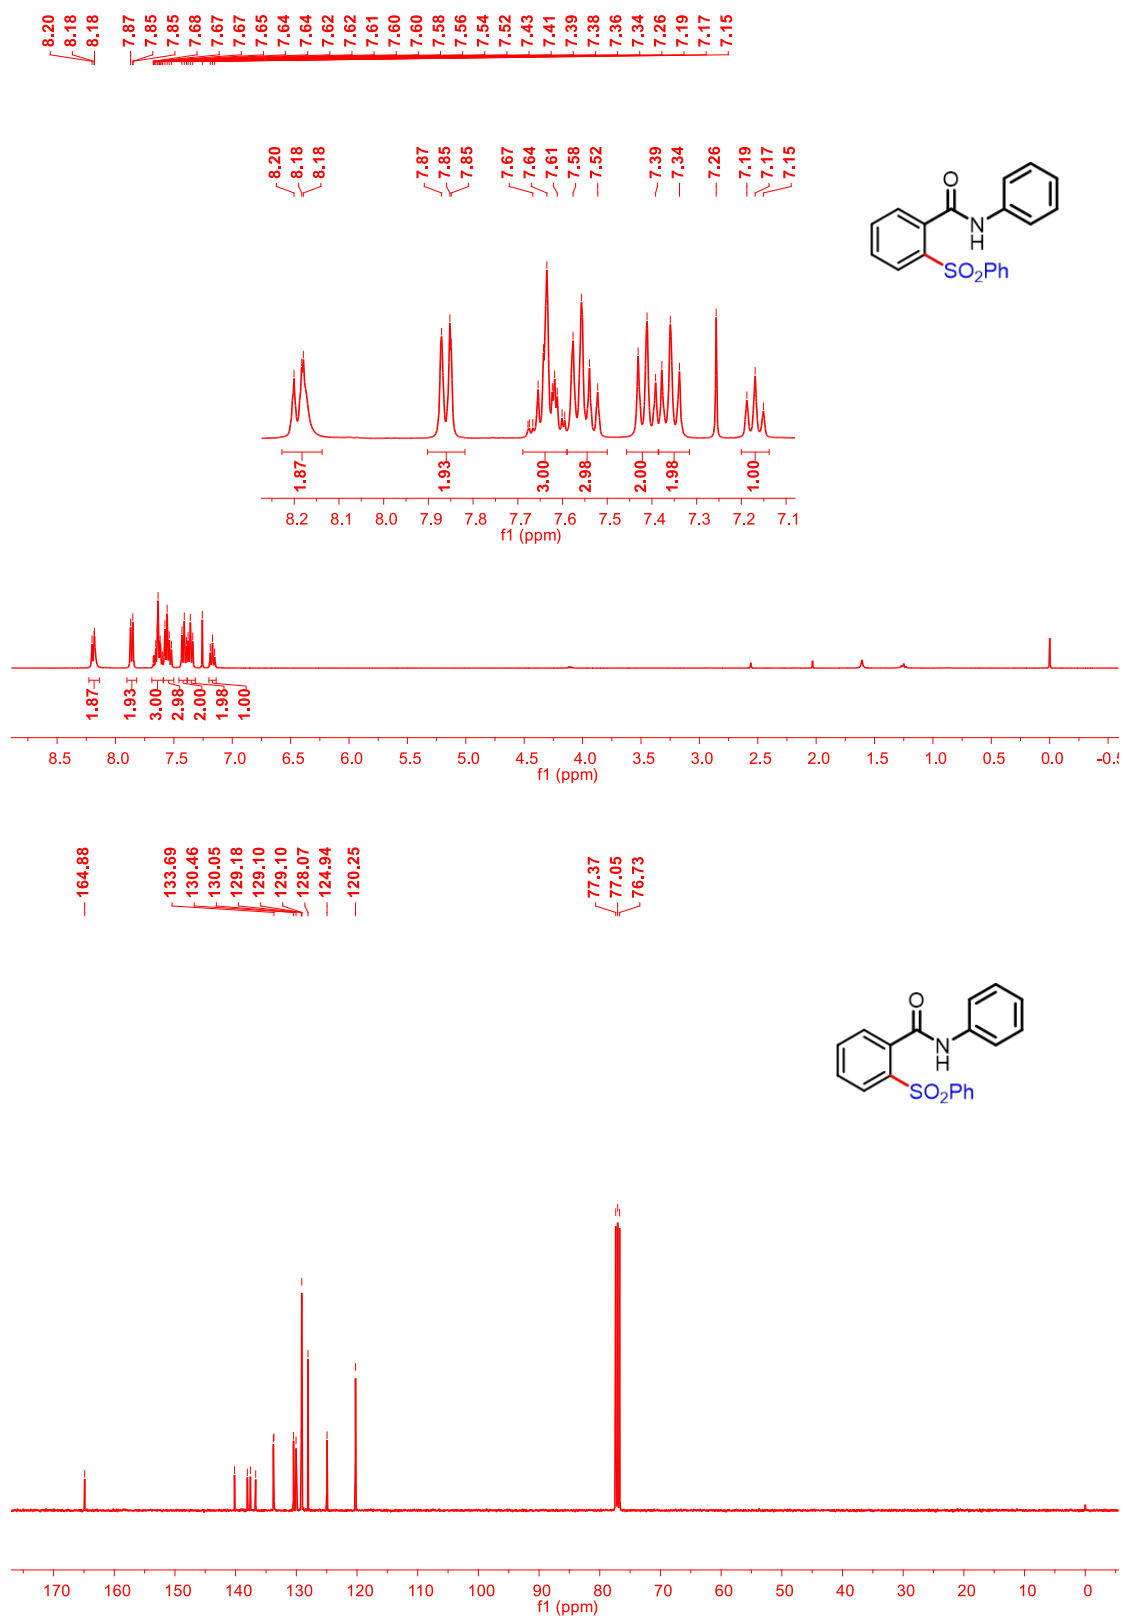

**Fig. S48** The  $^1\text{H}$  (400 MHz),  $^{13}\text{C}$  (101 MHz) NMR spectra for 4-((4-(9H-carbazol-9-yl)phenyl)sulfonyl)benzonitrile (**4**) in  $\text{CDCl}_3$

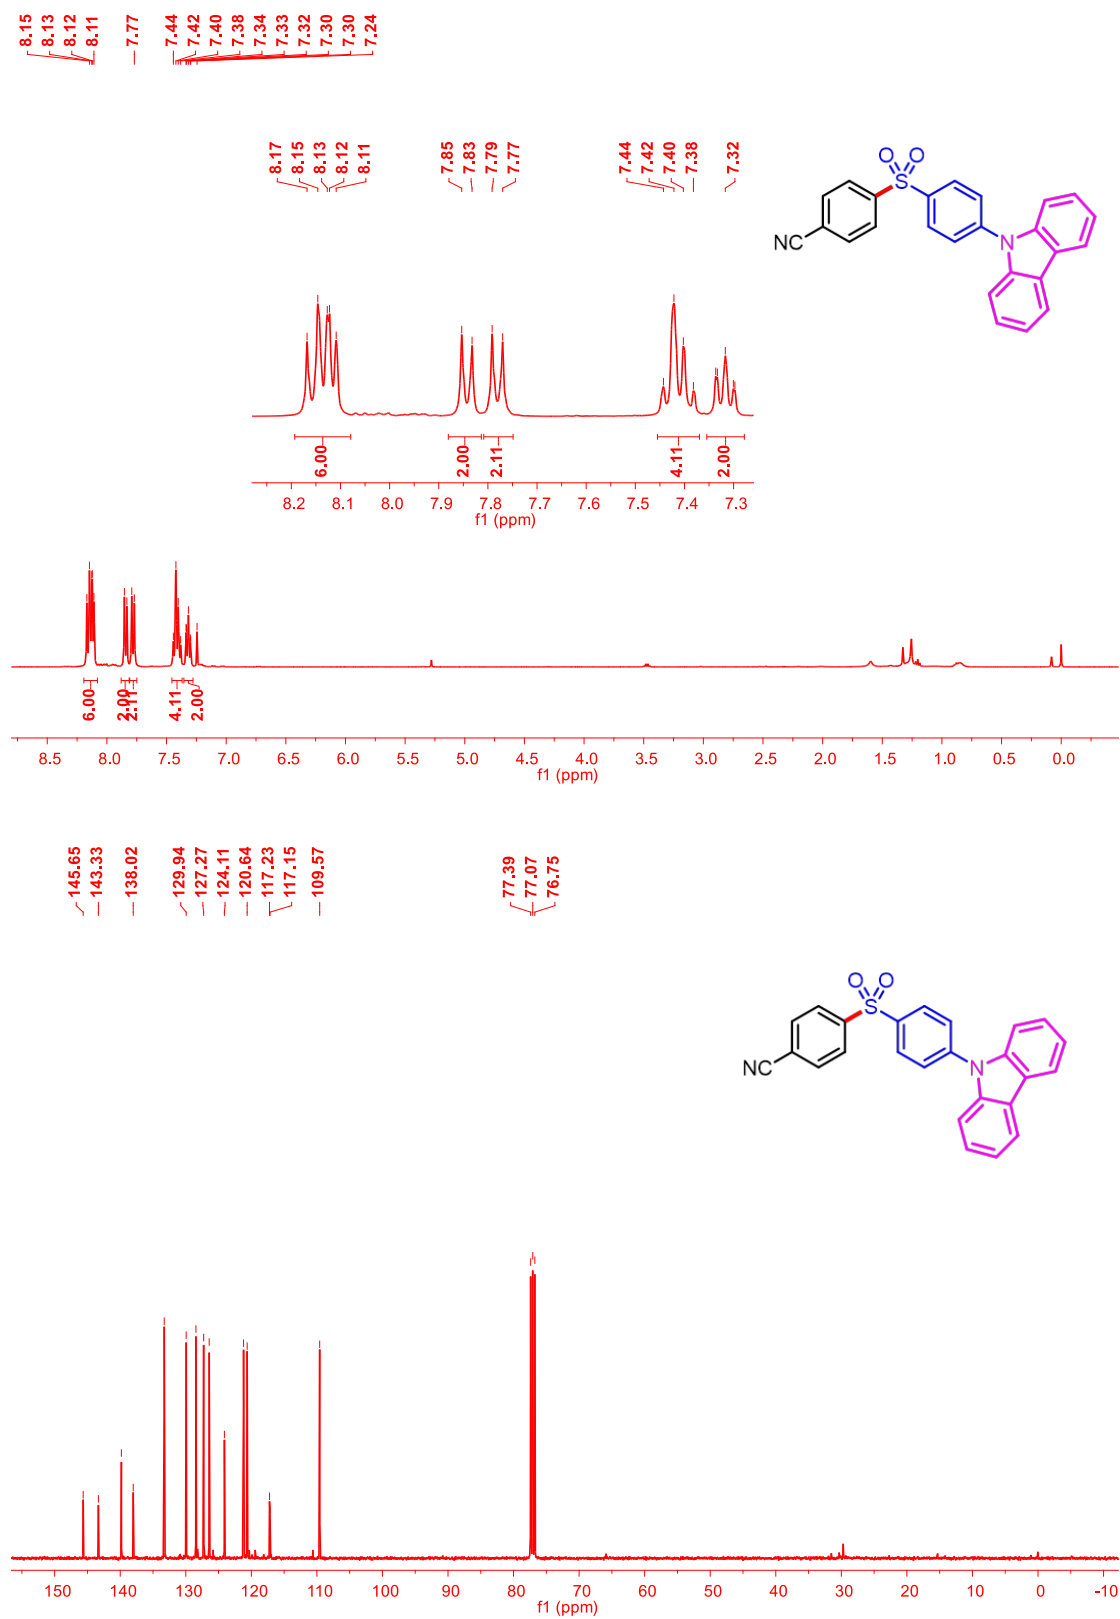

Supplement: d1qo01850g1.pdf [file d1qo01850g1.pdf]
